# Supplementary material for: Modulation of macrophage inflammatory function through selective inhibition of the epigenetic reader protein SP140
Source: BMC Biol. 2022 Aug 19;20:182. doi: 10.1186/s12915-022-01380-6 (PMC9392322; doi:10.1186/s12915-022-01380-6)
Supplement: Supplementary file 10 — Additional file 10: Table S10. The normalized read count for ChIP-seq (DMSO-pretreated “M1” macrophages stimulated with 4h LPS (100 ng/mL)). [file 12915_2022_1380_MOESM10_ESM.xlsx]

## Sheet: Sheet1
#H:hugo	tss_for_gene	The normalized read count
MIR3687-2	chr21:9826202	216.667
MIR3687-1	chr21:9826202	216.667
MIR3648-2	chr21:9825831	93.6667
MIR3648-1	chr21:9825831	93.6667
FLOT1	chr6:30710453	56.6667
MIR663A	chr20:26188914	37.6667
SCO2	chr22:50964574	31
FTH1	chr11:61735132	30.6667
MIR6087	chrX:108297771	30
MIR4530	chr19:39900318	29.3333
TMEM138	chr11:61129472	28.6667
SLC35B2	chr6:44225089	28.6667
GLUL	chr1:182360539	25
BZRAP1-AS1	chr17:56406298	25
NFE2L2	chr2:178128617	24.3333
CEBPB-AS1	chr20:48808606	24
TYMP	chr22:50968514	23.3333
SGK1	chr6:134496034	23.3333
ICAM4	chr19:10397642	23
NFKBIA	chr14:35873960	23
IRF1	chr5:131826465	22.6667
SOD2	chr6:160114353	22.6667
MIR7641-2	chr1:228752817	21.6667
LINC00910	chr17:41466266	21.6667
DMXL2	chr15:51914967	21.3333
MIR8078	chr18:112339	20.3333
ROCK1P1	chr18:109064	19.3333
CTSB	chr8:11725646	19
TNFAIP2	chr14:103592663	19
FTL	chr19:49468565	18
RHOU	chr1:228780393	18
IFITM10	chr11:1771824	17.6667
RGL2	chr6:33267165	17.6667
CAMK2D	chr4:114683083	17.3333
BZRAP1	chr17:56406152	17.3333
LINC01410	chr9:66457288	17.3333
LINC01465	chr12:62997214	16.6667
PLEKHO1	chr1:150122775	16.6667
CYB561A3	chr11:61129755	16.3333
NUP62	chr19:50432773	16
MIR4751	chr19:50436320	15.3333
JUNB	chr19:12902309	15.3333
IL4I1	chr19:50432796	15.3333
PNRC1	chr6:89790428	15.3333
B2M	chr15:45003684	15
HIVEP1	chr6:12012723	15
BHLHE40-AS1	chr3:5021646	15
IER3	chr6:30712327	15
ACTB	chr7:5570232	15
CCL3	chr17:34417506	14.6667
CDKN1A	chr6:36646486	14.6667
MIR142	chr17:56408679	14.6667
PRR7	chr5:176873795	14.3333
CXCL2	chr4:74964997	14.3333
GSTO2	chr10:106028630	14.3333
KLF6	chr10:3827473	14.3333
MIR6732	chr1:37945830	14.3333
CDH23	chr10:73571639	14.3333
TFEB	chr6:41702798	14.3333
RNF135	chr17:29297955	14.3333
GNA13	chr17:63052920	14
NEAT1	chr11:65190268	14
ZNF580	chr19:56152391	14
LOC100130476	chr6:138189370	14
HIST2H2AC	chr1:149858524	14
ZFP36	chr19:39897486	13.6667
MIR6821	chr22:50356513	13.6667
VIM-AS1	chr10:17271984	13.6667
CTSL	chr9:90340973	13.6667
NABP1	chr2:192542861	13.3333
RUFY3	chr4:71570653	13.3333
PDE4DIP	chr1:145039995	13.3333
MARCKS	chr6:114178513	13.3333
RNF19B	chr1:33430414	13
MGLL	chr3:127541725	13
MIR4477B	chr9:68415307	13
ODF3B	chr22:50971008	13
CAHM	chr6:163834982	12.6667
STAT1	chr2:191878976	12.6667
ACTR3	chr2:114648174	12.6667
TSSC4	chr11:2421717	12.6667
FGR	chr1:27961727	12.6667
SGPP2	chr2:223289321	12.3333
SOCS1	chr16:11350039	12.3333
MADD	chr11:47291198	12.3333
PIK3AP1	chr10:98480279	12
RNVU1-19	chr1:147994145	12
PNKD	chr2:219187901	12
MPDU1	chr17:7486964	12
PLA2G7	chr6:46703151	12
IRF5	chr7:128578270	12
RASGEF1B	chr4:82393082	12
PFKFB3	chr10:6244839	12
PGAM2	chr7:44105186	12
SH2B3	chr12:111843751	12
IRF2	chr4:185395726	11.6667
TMSB4X	chrX:12993225	11.6667
CD74	chr5:149792499	11.6667
WDR90	chr16:699362	11.6667
TTLL3	chr3:9851643	11.6667
PSMB8	chr6:32812712	11.3333
PCBP1-AS1	chr2:70314147	11.3333
PSAP	chr10:73611082	11.3333
DOCK4	chr7:111846462	11.3333
CTSZ	chr20:57582309	11.3333
FBXO39	chr17:6679551	11
TNF	chr6:31543343	11
LYRM1	chr16:20912425	11
SMAP2	chr1:40839377	11
DUSP5P1	chr1:228780656	11
PF4	chr4:74847841	11
ZEB2-AS1	chr2:145277180	11
CXCL3	chr4:74904490	11
JAK2	chr9:4985244	11
IL10RA	chr11:117857105	11
ZC3H12A	chr1:37940118	11
PLEC	chr8:145050913	11
BRD2	chr6:32940860	11
MIR7845	chr2:208031123	10.6667
STK40	chr1:36851528	10.6667
SIRPA	chr20:1875825	10.6667
MIRLET7I	chr12:62997465	10.6667
CYP1B1	chr2:38303323	10.6667
MAFB	chr20:39317880	10.6667
PSMB8-AS1	chr6:32811862	10.6667
TNFRSF6B	chr20:62328003	10.6667
PLAU	chr10:75670861	10.6667
CXCL1	chr4:74735108	10.3333
SRSF2	chr17:74733493	10.3333
C17ORF49	chr17:6918055	10.3333
SAMD4A	chr14:55034329	10.3333
LACC1	chr13:44453419	10.3333
ICAM1	chr19:10381516	10.3333
IRF2BP2	chr1:234745271	10
MIR4734	chr17:36858584	10
FPGS	chr9:130565459	10
GPX4	chr19:1104648	9.66667
PTGER2	chr14:52781015	9.66667
CAPG	chr2:85641197	9.66667
DRAM1	chr12:102271104	9.66667
APRT	chr16:88878342	9.66667
NR1H3	chr11:47279467	9.66667
IL10RB-AS1	chr21:34638565	9.66667
ACAT2	chr6:160182988	9.66667
RBM47	chr4:40631883	9.66667
TRIM8	chr10:104404251	9.66667
LINC00886	chr3:156534851	9.5
IL10RB	chr21:34638664	9.5
AMDHD2	chr16:2570362	9.33333
INPP5K	chr17:1420182	9.33333
GADD45B	chr19:2476122	9.33333
GSAP	chr7:77045717	9.33333
CD68	chr17:7482805	9.33333
REXO1L2P	chr8:86574742	9.33333
TNFAIP3	chr6:138188324	9.33333
MIR3190	chr19:47730198	9.33333
NFKB2	chr10:104155352	9.33333
EIF1	chr17:39845126	9
NINJ1	chr9:95896570	9
SPPL2A	chr15:51057910	9
HLA-F	chr6:29691116	9
PITPNA-AS1	chr17:1420212	9
NOTCH2	chr1:120612317	9
HS3ST2	chr16:22825859	9
POLG2	chr17:62493184	9
B4GALT1-AS1	chr9:33166945	9
RBM39	chr20:34330258	9
PAN3-AS1	chr13:28713311	9
SENP3-EIF4A1	chr17:7465308	9
S100A11	chr1:152009511	9
NCOA4	chr10:51572363	9
SLC15A3	chr11:60719257	9
HIST2H2AB	chr1:149859466	9
SLC4A2	chr7:150756656	9
TUBB	chr6:30689325	9
SENP3	chr17:7465308	9
MIR21	chr17:57918626	9
ZFP36L2	chr2:43453745	9
DUSP1	chr5:172198203	9
PSTPIP2	chr18:43652250	9
DAPK1	chr9:90113449	9
SLC2A6	chr9:136344276	9
POLR3E	chr16:22308695	8.66667
LINC01137	chr1:37940044	8.66667
PTPN2	chr18:12884334	8.66667
CLASRP	chr19:45542297	8.66667
LOC284454	chr19:13947103	8.66667
LOC100996583	chr1:2497973	8.66667
LGALS3	chr14:55595934	8.66667
DFNA5	chr7:24797083	8.66667
MIR3175	chr15:93447628	8.66667
MAP1LC3B	chr16:87425800	8.66667
TICAM2	chr5:114938176	8.66667
LOC100419583	chr15:45021185	8.66667
TCEB3CL2	chr18:44544607	8.66667
STX10	chr19:13261188	8.66667
RIC1	chr9:5629118	8.66667
EIF4A1	chr17:7476023	8.66667
FNDC3B	chr3:171758343	8.5
CFAP53	chr18:47792865	8.33333
TBC1D3F	chr17:34591996	8.33333
MIR6891	chr6:31323093	8.33333
LACTB	chr15:63413998	8.33333
TBC1D3H	chr17:34591996	8.33333
MMP14	chr14:23305741	8.33333
TAGLN2	chr1:159894341	8.33333
IFNGR2	chr21:34775201	8.33333
DDAH2	chr6:31698042	8.33333
SMG1P3	chr16:21513602	8.33333
CFLAR	chr2:201983268	8.33333
LOC101060321	chr17:34591982	8.33333
AZIN1	chr8:103876428	8.33333
RPL18	chr19:49122675	8.33333
FIZ1	chr19:56110893	8.33333
MIR6080	chr17:62776876	8.33333
LINC00854	chr17:41381062	8.33333
MIR6774	chr16:85951952	8.33333
KLF7	chr2:208031580	8.33333
TMEM185B	chr2:120980984	8.33333
SNAR-C3	chr19:48453552	8.33333
LOC100289511	chr14:70234430	8.33333
EPN1	chr19:56186560	8
PPP1R10	chr6:30585084	8
TIPARP-AS1	chr3:156393502	8
GRINA	chr8:145064225	8
DENND4B	chr1:153919154	8
FLJ36000	chr17:21904061	8
CTRL	chr16:67965778	8
RCN3	chr19:50030874	8
LPAR2	chr19:19739039	8
IPO7	chr11:9406168	8
BCL6	chr3:187463513	8
C19ORF71	chr19:3539154	8
TMEM88	chr17:7758383	8
ATF3	chr1:212788359	8
SLC9A8	chr20:48429249	8
C7ORF49	chr7:134855276	8
DLEU2	chr13:50699677	8
SRC	chr20:35974530	8
SKIL	chr3:170075472	8
MXD1	chr2:70142172	8
LOC100996437	chr7:66119505	7.66667
AZIN1-AS1	chr8:103876498	7.66667
PTMA	chr2:232573234	7.66667
WTAP	chr6:160148029	7.66667
ATXN2L	chr16:28834368	7.66667
MIR3188	chr19:18392886	7.66667
COX20	chr1:244998638	7.66667
CAMK1D	chr10:12391541	7.66667
TXN2	chr22:36877687	7.66667
AFF1	chr4:87856153	7.66667
CCL2	chr17:32582295	7.66667
MAN2B1	chr19:12777591	7.66667
MIR4750	chr19:50391431	7.66667
SNAR-A12	chr19:48410934	7.66667
HLA-DRB1	chr6:32557613	7.66667
NFKB1	chr4:103422485	7.66667
DVL2	chr17:7137863	7.66667
DICER1	chr14:95623759	7.66667
PXDC1	chr6:3752246	7.66667
C15ORF48	chr15:45722726	7.66667
IFI30	chr19:18284589	7.66667
IRF8	chr16:85932773	7.66667
ZNF513	chr2:27603311	7.66667
SNAR-A13	chr19:48410934	7.66667
NDST2	chr10:75571589	7.66667
CD63	chr12:56122761	7.66667
KPNB1	chr17:45727203	7.66667
LENG9	chr19:54974894	7.66667
ARSG	chr17:66287635	7.66667
MGRN1	chr16:4674824	7.66667
NFKBIZ	chr3:101568357	7.5
SLX1B-SULT1A4	chr16:30205753	7.33333
NFKBID	chr19:36391552	7.33333
SLC26A11	chr17:78194199	7.33333
YBEY	chr21:47706266	7.33333
MIR3187	chr19:813583	7.33333
RHBDF2	chr17:74497509	7.33333
MEMO1	chr2:32235733	7.33333
UBE2D3	chr4:103748340	7.33333
ZC3H12C	chr11:109964086	7.33333
ST3GAL1	chr8:134584183	7.33333
ATXN1L	chr16:71879893	7.33333
SGSH	chr17:78194199	7.33333
PIK3R5	chr17:8869029	7.33333
ZYX	chr7:143078359	7.33333
MIR8075	chr13:113917233	7.33333
TAF1D	chr11:93474703	7.33333
MAFF	chr22:38597938	7.33333
N4BP2	chr4:40058523	7.33333
RUSC1	chr1:155290639	7.33333
LINC01578	chr15:93426525	7.33333
YWHAZ	chr8:101963560	7.33333
LINC00441	chr13:48877797	7.33333
TNFRSF14	chr1:2487803	7.33333
CCDC122	chr13:44453826	7.33333
CD7	chr17:80275480	7.33333
STX11	chr6:144471653	7.33333
ATF5	chr19:50432399	7.33333
BCL3	chr19:45251977	7.33333
CHRAC1	chr8:141521396	7.33333
KLF2	chr19:16435650	7.33333
NUDT22	chr11:63993745	7.33333
MIR24-2	chr19:13947173	7.33333
DGKH	chr13:42622843	7.33333
NAMPT	chr7:105925638	7.33333
SLX1A-SULT1A3	chr16:30205753	7.33333
HLA-DPA1	chr6:33048555	7.33333
TIPARP	chr3:156392714	7
SECISBP2	chr9:91933765	7
VPS9D1	chr16:89787394	7
FOSL2	chr2:28615778	7
ARHGAP22	chr10:49813176	7
UBE2F-SCLY	chr2:238875586	7
NBN	chr8:90996899	7
NUP153	chr6:17707065	7
ZNF276	chr16:89787392	7
AMH	chr19:2249112	7
PPP1R35	chr7:100034094	7
BTG2	chr1:203274663	7
TARBP2	chr12:53894704	7
POLD1	chr19:50887579	7
LOC101060091	chr2:114648569	7
PTPN12	chr7:77167351	7
MYBPC3	chr11:47374253	7
TCEB3C	chr18:44556449	7
IDI1	chr10:1095061	7
HMOX1	chr22:35777059	7
HMCES	chr3:128997816	7
TIMM8B	chr11:111957522	7
KLF10	chr8:103666192	7
GBP5	chr1:89738544	7
B4GALT1	chr9:33167356	7
MIR636	chr17:74732630	7
MFSD11	chr17:74732646	7
RABGEF1	chr7:66205642	7
HMGN2	chr1:26798901	7
UBE2F	chr2:238875586	7
NEK7	chr1:198126107	7
UNC13D	chr17:73840798	7
RNF13	chr3:149530474	7
CD274	chr9:5450502	7
NCF1B	chr7:72634673	7
TAP1	chr6:32821748	7
ALG13	chrX:110924397	7
MKNK1	chr1:47069966	7
LRRK2	chr12:40618812	7
UBALD1	chr16:4664927	7
HSBP1L1	chr18:77724581	7
REC8	chr14:24641233	7
RCBTB2	chr13:49107392	6.66667
MIR23A	chr19:13947473	6.66667
AMZ2P1	chr17:62971703	6.66667
NR3C1	chr5:142783254	6.66667
RNU4ATAC	chr2:122288455	6.66667
RPS15	chr19:1438362	6.66667
CEBPB	chr20:48807119	6.66667
SNX16	chr8:82754521	6.66667
RAD23A	chr19:13056627	6.66667
DBI	chr2:120125250	6.66667
ADAMTSL4-AS1	chr1:150547028	6.66667
INAFM1	chr19:47778141	6.66667
RASSF5	chr1:206680862	6.66667
LOC100129518	chr6:160183364	6.66667
BTG1	chr12:92539673	6.66667
MFSD10	chr4:2935964	6.66667
LOC606724	chr16:29460665	6.66667
IL18BP	chr11:71710108	6.66667
ZFAS1	chr20:47894714	6.66667
RHOG	chr11:3862213	6.66667
MRPL28	chr16:420569	6.66667
CCRL2	chr3:46449048	6.66667
ULK3	chr15:75135552	6.66667
HCST	chr19:36393381	6.66667
USP17L15	chr4:9236110	6.66667
RELT	chr11:73087712	6.66667
CSRNP1	chr3:39195102	6.66667
KDM7A	chr7:139876741	6.66667
JMJD8	chr16:734439	6.66667
NOTCH2NL	chr1:145209112	6.66667
ABCA7	chr19:1040101	6.66667
MIR1281	chr22:41488516	6.66667
PCBP1	chr2:70314584	6.66667
ZFAND5	chr9:74980163	6.66667
LOC102724297	chr3:46448550	6.66667
COTL1	chr16:84651702	6.66667
LOC646903	chr3:149689065	6.5
NUDT16L1	chr16:4743693	6.33333
BHLHE40	chr3:5021096	6.33333
MBP	chr18:74844774	6.33333
TCEB3CL	chr18:44556213	6.33333
LINC00936	chr12:90102731	6.33333
ATP6V1B2	chr8:20054703	6.33333
GOLGA3	chr12:133405288	6.33333
CCDC57	chr17:80170689	6.33333
HLA-DRA	chr6:32407618	6.33333
SNORA64	chr16:2013107	6.33333
RNF181	chr2:85822836	6.33333
LINC01272	chr20:48884022	6.33333
WDR25	chr14:100842832	6.33333
AHNAK	chr11:62314332	6.33333
TNRC18	chr7:5463177	6.33333
SDHD	chr11:111957547	6.33333
LINC01220	chr14:75761106	6.33333
MIR6787	chr17:80194543	6.33333
E2F3	chr6:20403909	6.33333
SNX13	chr7:17980131	6.33333
HIST2H2AA3	chr1:149822627	6.33333
PDE4A	chr19:10527448	6.33333
ALOX12-AS1	chr17:6915653	6.33333
ZGPAT	chr20:62339379	6.33333
DHRS11	chr17:34948225	6.33333
TANK	chr2:162016938	6.33333
BGLAP	chr1:156211950	6.33333
PLXNB2	chr22:50746001	6.33333
VWA3B	chr2:98703594	6.33333
MGAT1	chr5:180230048	6.33333
FADS2	chr11:61583875	6.33333
HIST2H2AA4	chr1:149822627	6.33333
ZNF48	chr16:30389634	6.33333
AKR1A1	chr1:46016454	6.33333
WARS	chr14:100842680	6.33333
SIAH1	chr16:48419229	6.33333
TMEM223	chr11:62559486	6.33333
AP5B1	chr11:65548062	6.33333
FAM109B	chr22:42470254	6.33333
RELA	chr11:65430443	6.33333
TAF10	chr11:6633475	6.33333
SPSB2	chr12:6982449	6.33333
CREM	chr10:35416384	6.33333
KIAA1875	chr8:145162628	6.33333
SBF2	chr11:10315754	6.33333
DDIT3	chr12:57914300	6.33333
CSAD	chr12:53574430	6.33333
USF1	chr1:161015769	6.33333
SUSD6	chr14:70078309	6
MIR4444-1	chr2:178077453	6
PHF12	chr17:27278508	6
SDR39U1	chr14:24911659	6
PPP1R15A	chr19:49375648	6
MAN1A1	chr6:119670931	6
SNAR-A10	chr19:50610391	6
WDR83	chr19:12777617	6
HIST2H2BE	chr1:149858232	6
SNAR-A7	chr19:50610391	6
FAM20A	chr17:66597095	6
NPFF	chr12:53901422	6
SLC16A6	chr17:66287405	6
MIR6859-4	chr1:17436	6
AKT1S1	chr19:50380644	6
ZBTB4	chr17:7382944	6
NME4	chr16:447741	6
LINC01135	chr1:59250822	6
ZCWPW1	chr7:100026431	6
ARID3A	chr19:926036	6
MIR661	chr8:145019447	6
SNAR-B2	chr19:50642494	6
SNAR-A3	chr19:50610391	6
MIR6859-3	chr1:17436	6
STK10	chr5:171615346	6
SNAR-A4	chr19:50610391	6
MIR4444-2	chr2:178077453	6
SF1	chr11:64545938	6
HNRNPF	chr10:43892279	6
MIR6753	chr11:67812260	6
MALAT1	chr11:65265232	6
SFT2D1	chr6:166756094	6
PDF	chr16:69364498	6
MIR4505	chr14:74225449	6
HIF1A-AS1	chr14:62162541	6
SLC35E2B	chr1:1624243	6
EEF1A1	chr6:74230755	6
ACIN1	chr14:23540779	6
SPAG7	chr17:4871132	6
USP3	chr15:63796709	6
GRAMD2	chr15:72490136	6
SNAR-B1	chr19:50642494	6
NCF1	chr7:74188308	6
CCAR2	chr8:22462538	6
SNAR-A5	chr19:50610391	6
MIR6859-2	chr1:17436	6
MIR8085	chr19:45261913	6
HLA-A	chr6:29910246	6
TRPT1	chr11:63993341	6
LSS	chr21:47648738	6
EDEM1	chr3:5229358	6
KCTD19	chr16:67360661	6
SNAR-A14	chr19:50610391	6
ALDH3B1	chr11:67777774	6
LEMD2	chr6:33756906	6
SIRT7	chr17:79876058	6
SNAR-A8	chr19:50610391	6
PBX2	chr6:32157963	6
FEM1B	chr15:68570140	6
CELF6	chr15:72612287	6
IQUB	chr7:123173002	6
BCOR	chrX:39956719	6
MGA	chr15:41952609	6
CIRBP-AS1	chr19:1270259	6
BACH1	chr21:30671115	6
SNAR-A6	chr19:50610391	6
PLEKHA2	chr8:38758752	6
SNAR-A11	chr19:50610391	6
EIF5	chr14:103801197	6
MLLT10	chr10:21823573	6
EXOSC4	chr8:145133521	6
SNAR-A9	chr19:50610391	6
HLA-E	chr6:30457182	6
WDR1	chr4:10118573	6
MIR6859-1	chr1:17436	6
CNP	chr17:40118758	6
FAM49B	chr8:130952118	6
GPN2	chr1:27216869	5.66667
MIR193A	chr17:29887014	5.66667
DNAJC9	chr10:75007089	5.66667
EHBP1L1	chr11:65343508	5.66667
WASH7P	chr1:29370	5.66667
TACC1	chr8:38644721	5.66667
POLR2J3	chr7:102213068	5.66667
HELZ	chr17:65241319	5.66667
USF2	chr19:35759895	5.66667
HOXA10-AS	chr7:27208517	5.66667
TOM1	chr22:35695796	5.66667
B3GALT4	chr6:33244916	5.66667
SCML1	chrX:17755568	5.66667
PHTF2	chr7:77428108	5.66667
SPATC1	chr8:145086581	5.66667
BHLHE41	chr12:26278003	5.66667
HPN	chr19:35531409	5.66667
SLC16A3	chr17:80186281	5.66667
PFN1	chr17:4852381	5.66667
ZNF710	chr15:90544722	5.66667
THEMIS2	chr1:28199053	5.66667
LOC101929709	chr8:90769939	5.66667
CSTB	chr21:45196256	5.66667
ST3GAL5	chr2:86116157	5.66667
AANAT	chr17:74463629	5.66667
PLEKHG3	chr14:65171192	5.66667
VIM	chr10:17270257	5.66667
FDX1L	chr19:10426691	5.66667
CDK9	chr9:130548304	5.66667
CYP27A1	chr2:219646471	5.66667
CDV3	chr3:133293277	5.66667
ARHGAP27	chr17:43510282	5.66667
NCF1C	chr7:74587802	5.66667
FOXJ1	chr17:74137380	5.66667
APEX1	chr14:20923289	5.66667
CFAP46	chr10:134756089	5.66667
LITAF	chr16:11680229	5.66667
NFAM1	chr22:42828401	5.66667
TBC1D17	chr19:50380681	5.66667
FBRS	chr16:30670839	5.66667
SSH3	chr11:67070918	5.66667
ANGEL1	chr14:77279283	5.66667
ACSS1	chr20:25038818	5.66667
RBPJ	chr4:26321331	5.66667
MSH4	chr1:76262555	5.66667
MACC1	chr7:20257013	5.66667
IL32	chr16:3115784	5.66667
AGBL5	chr2:27274490	5.66667
UBTF	chr17:42297041	5.66667
NRP2	chr2:206547223	5.66667
LIMK2	chr22:31644347	5.66667
DOK3	chr5:176936858	5.66667
KDM3A	chr2:86668583	5.66667
PFKP	chr10:3110818	5.66667
FBXO31	chr16:87425713	5.66667
NAB2	chr12:57482676	5.66667
SH3BP2	chr4:2813945	5.66667
PCID2	chr13:113862962	5.66667
DDX3X	chrX:41193414	5.66667
PATL1	chr11:59436511	5.66667
ACP5	chr19:11689592	5.66667
ZNF277	chr7:111846642	5.66667
TMEM72-AS1	chr10:45455137	5.66667
PRORSD1P	chr2:55509454	5.66667
SH3KBP1	chrX:19905744	5.66667
CRTC2	chr1:153931132	5.66667
PPIF	chr10:81107219	5.66667
BLOC1S6	chr15:45879416	5.66667
PSMB9	chr6:32821937	5.66667
ARHGAP31-AS1	chr3:119041607	5.5
NRROS	chr3:196366566	5.5
FAM86HP	chr3:129830276	5.5
DDX59	chr1:200639126	5.5
VPRBP	chr3:51534018	5.5
RPS18	chr6:33239851	5.33333
VWCE	chr11:61062788	5.33333
NUP85	chr17:73201544	5.33333
MIR4726	chr17:36875943	5.33333
IST1	chr16:71929395	5.33333
ZNF703	chr8:37553268	5.33333
KLF3	chr4:38665789	5.33333
DRAP1	chr11:65686727	5.33333
SNORD10	chr17:7480128	5.33333
ADCK4	chr19:41222790	5.33333
SNAR-A1	chr19:48437437	5.33333
ASPSCR1	chr17:79935425	5.33333
YRDC	chr1:38273865	5.33333
PYCARD	chr16:31214097	5.33333
SPHK2	chr19:49128208	5.33333
OTUD1	chr10:23728197	5.33333
RAC1	chr7:6414125	5.33333
ACP2	chr11:47270179	5.33333
LOC101928438	chr9:102582171	5.33333
BOLA2B	chr16:29466285	5.33333
DESI1	chr22:42017061	5.33333
TLCD2	chr17:1613662	5.33333
ZNF252P-AS1	chr8:146228196	5.33333
B3GNT9	chr16:67184902	5.33333
ATM	chr11:108093558	5.33333
SAMD14	chr17:48207246	5.33333
JUN	chr1:59249785	5.33333
PICALM	chr11:85780139	5.33333
LOC729683	chr17:61777697	5.33333
MIR6822	chr3:39179696	5.33333
SEMA4A	chr1:156123368	5.33333
CYBA	chr16:88717492	5.33333
MIR1237	chr11:64136073	5.33333
SLC1A5	chr19:47290545	5.33333
RORA	chr15:61521502	5.33333
TTC21A	chr3:39149151	5.33333
PPFIBP2	chr11:7534995	5.33333
SNAR-A2	chr19:48437437	5.33333
TMSB10	chr2:85132762	5.33333
LTBR	chr12:6493198	5.33333
SCRT2	chr20:656823	5.33333
BRICD5	chr16:2261069	5.33333
AMPD3	chr11:10477480	5.33333
TCTEX1D4	chr1:45272957	5.33333
FKBP2	chr11:64009587	5.33333
MAFG-AS1	chr17:79885704	5.33333
BOLA2	chr16:29466285	5.33333
CAP1	chr1:40506254	5.33333
ARRDC2	chr19:18111940	5.33333
AGTRAP	chr1:11796141	5.33333
CFLAR-AS1	chr2:202022515	5.33333
SELPLG	chr12:109025854	5.33333
SLC43A2	chr17:1532180	5.33333
DNAJC9-AS1	chr10:75007124	5.33333
ARPC2	chr2:219082119	5.33333
MIR4482	chr10:106028163	5.33333
ZCCHC8	chr12:122985620	5.33333
MIR4257	chr1:150524404	5.33333
TOR3A	chr1:179051111	5.33333
LUC7L2	chr7:139025104	5.33333
UPK3BL	chr7:102283238	5.33333
PANK3	chr5:168006614	5.33333
CHMP2A	chr19:59066370	5.33333
SNX5	chr20:17949437	5.33333
BMI1	chr10:22610138	5.33333
OSGIN2	chr8:90914761	5.33333
DHX9	chr1:182808438	5.33333
PPIL6	chr6:109762374	5.33333
ITPRIPL2	chr16:19125253	5.33333
CLN6	chr15:68522080	5.33333
RB1	chr13:48877882	5.33333
APC2	chr19:1450147	5.33333
CASP8	chr2:202098165	5.33333
TNFRSF4	chr1:1149548	5.33333
MIR941-2	chr20:62551220	5
LOC654342	chr2:91847975	5
ZMYM6NB	chr1:35450948	5
UBE2J1	chr6:90062619	5
UCKL1	chr20:62587800	5
TAL1	chr1:47698007	5
ACSL1	chr4:185733413	5
SORBS3	chr8:22423178	5
AGBL2	chr11:47736928	5
ZNF804A	chr2:185463092	5
NPAS4	chr11:66188474	5
MIR3191	chr19:47730276	5
MRPL40	chr22:19420035	5
PAM16	chr16:4401373	5
AMZ2	chr17:66244144	5
BCLAF1	chr6:136610989	5
KAT8	chr16:31128984	5
MID1IP1-AS1	chrX:38663136	5
LOC100506142	chr2:46807377	5
MIR941-5	chr20:62551220	5
PRR34	chr22:46450024	5
SMCR8	chr17:18218593	5
WDFY2	chr13:52158483	5
ZBTB11	chr3:101395988	5
HS1BP3	chr2:20850864	5
GCH1	chr14:55369542	5
AKAP8	chr19:15490612	5
MAP2K3	chr17:21191347	5
USP30	chr12:109490374	5
BID	chr22:18256808	5
LOC100133985	chr2:70352448	5
RNU11	chr1:28975111	5
SUN2	chr22:39152024	5
TLN1	chr9:35732392	5
ARRDC3-AS1	chr5:90676163	5
HAMP	chr19:35773409	5
SQSTM1	chr5:179234002	5
MUC12	chr7:100612903	5
MIR941-4	chr20:62551220	5
CHMP4B	chr20:32399109	5
RGS10	chr10:121302222	5
WBP4	chr13:41635696	5
PDAP1	chr7:99006305	5
MIR1292	chr20:2633422	5
KCNK7	chr11:65363467	5
MICAL1	chr6:109777190	5
NLRC3	chr16:3627405	5
MEPCE	chr7:100026412	5
SYNJ2	chr6:158402887	5
TPRA1	chr3:127309602	5
LILRB1	chr19:55141967	5
NUDT17	chr1:145589435	5
TPI1	chr12:6977277	5
LOC101927243	chr7:77044514	5
LOC101929613	chr16:3048955	5
CEBPD	chr8:48650726	5
DSE	chr6:116692109	5
GPR35	chr2:241564661	5
AGAP3	chr7:150782917	5
NOL10	chr2:10830113	5
KLF11	chr2:10184371	5
TLX2	chr2:74741595	5
CXCL8	chr4:74606222	5
ATF4	chr22:39916568	5
MIF	chr22:24236564	5
MIR1181	chr19:10514214	5
TAOK2	chr16:29985187	5
RPL39	chrX:118925622	5
UCP2	chr11:73693889	5
C10ORF25	chr10:45496358	5
MIR941-3	chr20:62551220	5
POLR2A	chr17:7387697	5
SFT2D2	chr1:168195254	5
SNORA48	chr17:7478030	5
ARHGEF12	chr11:120207617	5
NOTCH1	chr9:139440238	5
POLDIP3	chr22:43010968	5
ARPC3	chr12:110888216	5
TRPM2	chr21:45773483	5
HIST1H2BK	chr6:27114637	5
RPS25	chr11:118889057	5
MYADM	chr19:54371118	5
SQRDL	chr15:45926937	5
TSC22D3	chrX:106959711	5
C11ORF45	chr11:128775592	5
NRAS	chr1:115259515	5
PFN2	chr3:149688741	5
KCNAB2	chr1:6086072	5
TMED1	chr19:10946416	5
CTSC	chr11:88070941	5
DECR1	chr8:91013579	4.66667
TAOK3	chr12:118810750	4.66667
ABR	chr17:982386	4.66667
ZNF687	chr1:151254030	4.66667
LAT	chr16:28996386	4.66667
IER2	chr19:13261281	4.66667
EFTUD2	chr17:42976736	4.66667
LOC100289495	chr6:166756118	4.66667
MIR4477A	chr9:68415388	4.66667
RPL13AP5	chr19:49990864	4.66667
SGMS1	chr10:52383737	4.66667
EGR3	chr8:22549902	4.66667
PRDM11	chr11:45168893	4.66667
GPX3	chr5:150399998	4.66667
CDC42SE2	chr5:130599701	4.66667
HDGF	chr1:156721543	4.66667
MGAT4B	chr5:179233952	4.66667
FAM21A	chr10:51827647	4.66667
ATXN1	chr6:16761721	4.66667
KLF13	chr15:31619057	4.66667
MRPL24	chr1:156710923	4.66667
MIR301B	chr22:22007269	4.66667
KCNC3	chr19:50836772	4.66667
NR6A1	chr9:127533589	4.66667
MLLT6	chr17:36861872	4.66667
MICALL2	chr7:1499109	4.66667
MREG	chr2:216878346	4.66667
C18ORF32	chr18:47013644	4.66667
ZNF18	chr17:11900689	4.66667
CITED2	chr6:139695350	4.66667
SNAPC5	chr15:66790146	4.66667
WASH2P	chr2:114341229	4.66667
RIPK2	chr8:90769974	4.66667
YWHAB	chr20:43514239	4.66667
MIR941-1	chr20:62551025	4.66667
PABPC1L	chr20:43538702	4.66667
PSEN1	chr14:73603142	4.66667
TRIP12	chr2:230786725	4.66667
MVD	chr16:88729557	4.66667
TSC1	chr9:135820020	4.66667
PSMG1	chr21:40555440	4.66667
FFAR2	chr19:35940616	4.66667
KPTN	chr19:47987521	4.66667
REPIN1	chr7:150065878	4.66667
EIF4EBP3	chr5:139927250	4.66667
C17ORF96	chr17:36831187	4.66667
TRIM69	chr15:45028559	4.66667
FAM195B	chr17:79791170	4.66667
FMNL3	chr12:50101197	4.66667
ETHE1	chr19:44031396	4.66667
STAT2	chr12:56754037	4.66667
TKFC	chr11:61100653	4.66667
VPS13C	chr15:62352664	4.66667
HEIH	chr5:180258618	4.66667
SLC30A2	chr1:26372629	4.66667
TNIP1	chr5:150460645	4.66667
ODC1	chr2:10587925	4.66667
CROCCP2	chr1:16957401	4.66667
TMUB1	chr7:150780413	4.66667
PHKG1	chr7:56160689	4.66667
EFR3A	chr8:132916355	4.66667
UGCG	chr9:114659045	4.66667
HLA-DMB	chr6:32908847	4.66667
MIR106B	chr7:99691697	4.66667
FAM173A	chr16:771141	4.66667
LYN	chr8:56792385	4.66667
MCOLN1	chr19:7587495	4.66667
ZSCAN25	chr7:99214570	4.66667
HNRNPAB	chr5:177631507	4.66667
MIR760	chr1:94312387	4.66667
MIB1	chr18:19321289	4.66667
TLR1	chr4:38806412	4.66667
MIR1539	chr18:47013742	4.66667
PTMS	chr12:6875540	4.66667
FLJ37453	chr1:16174642	4.66667
LAP3	chr4:17578926	4.66667
UBALD2	chr17:74261285	4.66667
TDRD7	chr9:100174301	4.66667
C11ORF98	chr11:62432688	4.66667
SNORD105B	chr19:10220424	4.66667
MED29	chr19:39881962	4.66667
TFRC	chr3:195808961	4.66667
ID2-AS1	chr2:8821991	4.66667
TRIM44	chr11:35684299	4.66667
RPL13A	chr19:49990810	4.66667
MMP23A	chr1:1568158	4.66667
LOC101927100	chr5:114937851	4.66667
RNF39	chr6:30043626	4.66667
IDO1	chr8:39771327	4.66667
RMND5A	chr2:86947413	4.66667
ARMC9	chr2:232063259	4.66667
PPP1R3E	chr14:23772057	4.66667
EHD1	chr11:64647185	4.66667
PDE1B	chr12:54943863	4.66667
SNORA67	chr17:7481272	4.66667
NBPF25P	chr1:145289769	4.66667
NPB	chr17:79860071	4.66667
C11ORF31	chr11:57508721	4.66667
EGR2	chr10:64576126	4.66667
ATP6AP1	chrX:153656977	4.66667
NFIC	chr19:3366564	4.66667
STXBP2	chr19:7701986	4.66667
HNRNPLL	chr2:38830178	4.66667
USP22	chr17:20946352	4.66667
FOXO3	chr6:108882068	4.66667
PRRT2	chr16:29823408	4.66667
B3GAT3	chr11:62389647	4.66667
LACTB2	chr8:71581447	4.66667
HCK	chr20:30639990	4.66667
ADRB1	chr10:115803805	4.66667
MIR210	chr11:568198	4.66667
PTTG1IP	chr21:46293818	4.66667
GTF2H1	chr11:18343815	4.66667
RRP1	chr21:45209417	4.66667
ELMSAN1	chr14:74227001	4.66667
ARL8B	chr3:5163929	4.66667
DIS3L2	chr2:232826292	4.66667
H3F3A	chr1:226250407	4.5
DENND6A	chr3:57678816	4.5
DTX3L	chr3:122283184	4.5
BRWD1-IT2	chr21:40685832	4.5
C3ORF80	chr3:159943422	4.5
CGGBP1	chr3:88108146	4.5
PNMA1	chr14:74181128	4.33333
ERBB2IP	chr5:65222381	4.33333
POLG	chr15:89878026	4.33333
KLF4	chr9:110252047	4.33333
TCP1	chr6:160210735	4.33333
ZNF775	chr7:150076405	4.33333
ALOX12	chr17:6899383	4.33333
N4BP2L1	chr13:33002315	4.33333
BMP2K	chr4:79697531	4.33333
RNASEK	chr17:6915735	4.33333
PAG1	chr8:82024303	4.33333
RBM14-RBM4	chr11:66384052	4.33333
PELI1	chr2:64371605	4.33333
HOXA7	chr7:27196296	4.33333
DIAPH1	chr5:140998622	4.33333
CEP76	chr18:12702776	4.33333
CEBPG	chr19:33865429	4.33333
QRSL1	chr6:107077440	4.33333
ERN1	chr17:62207502	4.33333
RAB43	chr3:128840647	4.33333
NPC1	chr18:21166581	4.33333
NBPF15	chr1:148560846	4.33333
SRSF6	chr20:42086503	4.33333
MCM8-AS1	chr20:5986467	4.33333
CCNDBP1	chr15:43477465	4.33333
ITGB8	chr7:20370724	4.33333
ZFX	chrX:24167853	4.33333
RNU86	chr22:39712901	4.33333
DCAKD	chr17:43128885	4.33333
FCER1G	chr1:161185086	4.33333
MIR4746	chr19:4445974	4.33333
DPYSL2	chr8:26435339	4.33333
H3F3AP4	chr1:226250427	4.33333
HIST1H2BC	chr6:26124132	4.33333
CSNK1D	chr17:80231594	4.33333
HERPUD1	chr16:56966001	4.33333
ADPRH	chr3:119298279	4.33333
MYO19	chr17:34891305	4.33333
VPS4A	chr16:69345286	4.33333
SCAF8	chr6:155054511	4.33333
DDX5	chr17:62502484	4.33333
PES1	chr22:31003000	4.33333
RNASEH2C	chr11:65488409	4.33333
LINC00869	chr1:144341077	4.33333
MIR2861	chr9:130548196	4.33333
SMARCC1	chr3:47823405	4.33333
TSPAN3	chr15:77363570	4.33333
SLCO3A1	chr15:92396937	4.33333
SH3GLB1	chr1:87170252	4.33333
DCLRE1B	chr1:114447914	4.33333
LOC148413	chr1:1334909	4.33333
CCDC40	chr17:78010430	4.33333
MIR126	chr9:139565053	4.33333
CMTM2	chr16:66613350	4.33333
C1QB	chr1:22979681	4.33333
UBC	chr12:125399587	4.33333
ULK4	chr3:42003660	4.33333
ARL6IP6	chr2:153574406	4.33333
ATXN2	chr12:112037480	4.33333
BCS1L	chr2:219524378	4.33333
MIR612	chr11:65211928	4.33333
MYL12B	chr18:3262716	4.33333
SNORD23	chr19:48259109	4.33333
RBM14	chr11:66384052	4.33333
FAM21EP	chr10:51827563	4.33333
MCMBP	chr10:121632395	4.33333
TCN2	chr22:31003069	4.33333
SLC17A5	chr6:74363737	4.33333
INSIG1	chr7:155089485	4.33333
LOC100288181	chr8:143808391	4.33333
TBK1	chr12:64845839	4.33333
MIR6728	chr1:8926649	4.33333
ADRM1	chr20:60877951	4.33333
SNORD12C	chr20:47895481	4.33333
CAGE1	chr6:7389942	4.33333
RPS28	chr19:8386383	4.33333
CTC-338M12.4	chr5:180673540	4.33333
COMMD5	chr8:146078452	4.33333
SUV420H1	chr11:67981239	4.33333
ARID5A	chr2:97202463	4.33333
VRK2	chr2:58273846	4.33333
EIF5A	chr17:7210855	4.33333
CMKLR1	chr12:108733094	4.33333
LOC285074	chr2:87303536	4.33333
CISD3	chr17:36886509	4.33333
C11ORF54	chr11:93474759	4.33333
RNF225	chr19:58907456	4.33333
AKAP10	chr17:19881169	4.33333
RPAP3	chr12:48099844	4.33333
ZNF518A	chr10:97889812	4.33333
UROS	chr10:127511837	4.33333
MOB3A	chr19:2096269	4.33333
SPDYE2B	chr7:102191678	4.33333
LOC391322	chr22:24373116	4.33333
LATS1	chr6:150039392	4.33333
VPS28	chr8:145653946	4.33333
PRMT3	chr11:20409075	4.33333
GIMAP5	chr7:150434435	4.33333
ICAM5	chr19:10400654	4.33333
ZC3H6	chr2:113033177	4.33333
RASSF4	chr10:45455218	4.33333
MIA	chr19:41281281	4.33333
HNRNPA2B1	chr7:26240413	4.33333
CCDC78	chr16:776473	4.33333
PHF23	chr17:7142825	4.33333
TEFM	chr17:29233286	4.33333
ARID5B	chr10:63661012	4.33333
PIM1	chr6:37137921	4.33333
LOC115110	chr1:2488450	4.33333
EVA1B	chr1:36789249	4.33333
ZEB2	chr2:145277958	4.33333
ARPIN	chr15:90455919	4.33333
MFSD5	chr12:53645875	4.33333
STX4	chr16:31044811	4.33333
LOC100129917	chr4:775636	4.33333
IL6R	chr1:154377668	4.33333
GALR2	chr17:74070881	4.33333
PARP4	chr13:25086948	4.33333
RPL15	chr3:23959195	4.33333
JMJD1C-AS1	chr10:65224988	4.33333
CDC37	chr19:10514271	4.33333
PTPRJ	chr11:48002109	4.33333
ZNF668	chr16:31084823	4.33333
PHF11	chr13:50070527	4.33333
SLC35F6	chr2:26987141	4.33333
ARHGEF3	chr3:56835995	4.33333
GNL1	chr6:30525371	4.33333
KRBA2	chr17:8280029	4.33333
LATS2	chr13:21635722	4.33333
LOC642361	chr10:81585657	4.33333
HIF1A	chr14:62162118	4.33333
ZC3H10	chr12:56512343	4.33333
SPDYE2	chr7:102191678	4.33333
GTF3C6	chr6:111279762	4.33333
MIR22HG	chr17:1619566	4.33333
HNRNPL	chr19:39340617	4.33333
TOB1	chr17:48943715	4.33333
RING1	chr6:33176285	4.33333
TRAF2	chr9:139780964	4.33333
C19ORF24	chr19:1275519	4.33333
CORO1C	chr12:109124619	4.33333
PTPN9	chr15:75871632	4.33333
PTGER4	chr5:40680031	4.33333
GNE	chr9:36258496	4.33333
TGIF1	chr18:3450169	4.33333
ADPGK	chr15:73076126	4.33333
TOLLIP	chr11:1330892	4.33333
TLR2	chr4:154605440	4.33333
LTA4H	chr12:96429439	4.33333
KIAA1683	chr19:18385319	4.33333
RAF1	chr3:12705700	4.33333
TMEM9B	chr11:8986320	4.33333
LOC100240735	chr12:54475607	4.33333
RNASEK-C17ORF49	chr17:6915735	4.33333
MFSD12	chr19:3557582	4.33333
CUL9	chr6:43149921	4.33333
CLUAP1	chr16:3550944	4.33333
GRB2	chr17:73401789	4
LOC729603	chr6:160514113	4
C16ORF72	chr16:9185536	4
LILRA6	chr19:54746610	4
OSGEP	chr14:20923267	4
GGTLC2	chr22:22987090	4
SOCS3	chr17:76356160	4
LMNB1	chr5:126112314	4
HIST2H3A	chr1:149824180	4
KCNG3	chr2:42721237	4
TBC1D22A	chr22:47158513	4
ANKRD20A4	chr9:69381980	4
GALNS	chr16:88923374	4
ZNF581	chr19:56154985	4
HBEGF	chr5:139726188	4
ZC3H3	chr8:144623620	4
LOC100132356	chr5:43067073	4
TOB1-AS1	chr17:48944039	4
RUNDC3B	chr7:87257728	4
PYGO2	chr1:154934258	4
LOC100132077	chr9:97094757	4
USP17L29	chr4:9341128	4
VWA7	chr6:31745108	4
MRPL49	chr11:64889715	4
MIR4308	chr14:55344911	4
SPSB3	chr16:1832581	4
CPEB2-AS1	chr4:15003669	4
GSDMD	chr8:144635556	4
SERPINB9	chr6:2903546	4
TPCN1	chr12:113659242	4
NIPBL	chr5:36876860	4
ARL2BP	chr16:57279037	4
TMEM259	chr19:1021141	4
BROX	chr1:222886662	4
ZCCHC6	chr9:88969402	4
LAD1	chr1:201368669	4
PAOX	chr10:135192740	4
STARD4	chr5:110848157	4
EGLN2	chr19:41305333	4
CHCHD10	chr22:24110159	4
SLC7A5P1	chr16:29625038	4
ADM	chr11:10326526	4
AFTPH	chr2:64751438	4
SGK3	chr8:67624652	4
NME1	chr17:49230919	4
IQCH-AS1	chr15:67814182	4
CYC1	chr8:145149937	4
MIDN	chr19:1248551	4
GALNT4	chr12:89918583	4
TEF	chr22:41777932	4
TPM4	chr19:16187134	4
TNIP2	chr4:2757752	4
OSBPL11	chr3:125314381	4
MIR4673	chr9:139414078	4
GAS8-AS1	chr16:90096309	4
GSK3A	chr19:42746736	4
ZNFX1	chr20:47894756	4
HMGA1	chr6:34204649	4
FANK1	chr10:127585107	4
VSIG10	chr12:118541810	4
SPG20-AS1	chr13:36920567	4
USP17L28	chr4:9341128	4
CMTM3	chr16:66638633	4
SF3A3	chr1:38455761	4
SULF2	chr20:46414808	4
SPDYA	chr2:29033699	4
DECR2	chr16:451857	4
ATP5A1	chr18:43678319	4
CEP192	chr18:12991360	4
SLAMF7	chr1:160708846	4
LRP12	chr8:105601252	4
RNH1	chr11:506821	4
WRNIP1	chr6:2765665	4
PSMA6	chr14:35761522	4
GATA2-AS1	chr3:128208045	4
ACTN3	chr11:66314311	4
USP17L30	chr4:9341128	4
RUNX1	chr21:36260987	4
SUPT3H	chr6:45345788	4
CLK1	chr2:201729284	4
RTN4	chr2:55276326	4
GMPPB	chr3:49761407	4
HIVEP2	chr6:143266338	4
C12ORF73	chr12:104350993	4
KMT2A	chr11:118307204	4
DPP8	chr15:65809609	4
C5ORF24	chr5:134181657	4
POLR3D	chr8:22102618	4
ZNF718	chr4:53192	4
SLC50A1	chr1:155107819	4
RANBP1	chr22:20105475	4
RCOR1	chr14:103058995	4
CEACAM21	chr19:42055885	4
EHMT1	chr9:140513443	4
ENO1	chr1:8939151	4
LINC00847	chr5:180257956	4
POM121L1P	chr22:22987012	4
LOC101929626	chr1:46599042	4
SYNRG	chr17:35969486	4
S1PR4	chr19:3178735	4
DOT1L	chr19:2164147	4
ING2	chr4:184427234	4
TMBIM4	chr12:66563852	4
MBD6	chr12:57916658	4
USP17L26	chr4:9341128	4
ABHD11	chr7:73153184	4
GRK5	chr10:120967196	4
TALDO1	chr11:747431	4
RPS6KA2	chr6:167040726	4
SH3D21	chr1:36771993	4
SNX22	chr15:64443915	4
LOC439994	chr10:89102167	4
C15ORF39	chr15:75494220	4
USP17L27	chr4:9341128	4
NR1D1	chr17:38256978	4
TTLL1	chr22:43485434	4
ECE2	chr3:183967444	4
ATG4B	chr2:242577026	4
NSUN5P1	chr7:75039604	4
MOV10	chr1:113217094	4
MAPK6	chr15:52311410	4
MIR6793	chr19:10939648	4
NFIX	chr19:13135394	4
ANAPC5	chr12:121790265	4
USP17L5	chr4:9341128	4
HIST2H3C	chr1:149824180	4
MIR663B	chr2:133014653	4
SNAR-C4	chr19:48442797	4
MIR4492	chr11:118781416	4
YME1L1	chr10:27443349	4
USP17L25	chr4:9341128	4
HSPA8	chr11:122933043	4
AURKAIP1	chr1:1310562	4
TNFSF13	chr17:7461608	4
CARHSP1	chr16:8961285	4
PPP3R1	chr2:68479651	4
SP3	chr2:174828947	4
NLE1	chr17:33469270	4
RBM25	chr14:73525220	4
CAAP1	chr9:26892826	4
IQGAP2	chr5:75699079	4
NDUFB1	chr14:92588153	4
ATP5I	chr4:668127	4
RASL10B	chr17:34058678	4
SDC4	chr20:43977064	4
ALDOA	chr16:30075817	4
TVP23B	chr17:18684581	4
MIR1908	chr11:61582712	4
CTBP2	chr10:126849103	4
AUP1	chr2:74757024	4
CCDC97	chr19:41816093	4
PPP1R15B	chr1:204380945	4
DGUOK	chr2:74153952	4
SUPT4H1	chr17:56429599	4
TAGAP	chr6:159466184	4
VEGFA	chr6:43737945	4
SNORA80E	chr1:155889833	4
STAM2	chr2:153032506	4
C21ORF2	chr21:45759285	4
HDLBP	chr2:242212246	4
ATOX1	chr5:151138210	4
CHSY1	chr15:101792137	4
SKP2	chr5:36152144	4
PTGES3	chr12:57081781	4
ZNF595	chr4:53178	4
EXOSC8	chr13:37574677	4
MVP	chr16:29841835	4
FLJ10038	chr15:50647076	4
ZNF841	chr19:52599018	4
MIR3680-2	chr16:29610586	4
FAM120B	chr6:170599790	4
NSUN5P2	chr7:72425302	4
ITM2B	chr13:48807273	4
TERC	chr3:169482848	4
ATF1	chr12:51157788	4
USP17L24	chr4:9341128	4
SLC7A5P2	chr16:21531765	4
TGFB1	chr19:41859838	4
LRRC36	chr16:67360746	4
SRRM1	chr1:24970049	4
PHTF1	chr1:114301777	4
MNT	chr17:2304258	4
RAP2C	chrX:131352189	4
FIBP	chr11:65656010	4
ROGDI	chr16:4852951	4
CMIP	chr16:81528953	4
MIR4522	chr17:25621022	4
HM13-AS1	chr20:30161066	4
RSRP1	chr1:25573985	4
MIR3680-1	chr16:29610586	4
HNRNPH3	chr10:70091767	4
PDCD2	chr6:170893742	4
UHRF1BP1L	chr12:100536642	4
C7ORF55	chr7:139025195	4
RALA	chr7:39663151	4
ADSL	chr22:40742503	4
SNORA70	chrX:153628621	4
NMI	chr2:152146430	4
EFCAB2	chr1:245133630	4
PIK3IP1	chr22:31688520	4
MIR1976	chr1:26881032	3.66667
RIMBP3B	chr22:21738039	3.66667
OGFR-AS1	chr20:61436939	3.66667
FLJ13224	chr12:31477249	3.66667
FMNL1	chr17:43299291	3.66667
FAM156A	chrX:52926321	3.66667
RAD50	chr5:131892615	3.66667
FAM168A	chr11:73309234	3.66667
HRC	chr19:49658681	3.66667
HDAC1	chr1:32757707	3.66667
CTSO	chr4:156875048	3.66667
PARD6B	chr20:49348080	3.66667
FZR1	chr19:3522953	3.66667
SNORA56	chrX:154003272	3.66667
C1ORF53	chr1:197871681	3.66667
MIR146A	chr5:159912358	3.66667
ZNF783	chr7:148959261	3.66667
ATAD2B	chr2:24149984	3.66667
STAG2	chrX:123094409	3.66667
MIR149	chr2:241395417	3.66667
DYNLRB2	chr16:80574848	3.66667
ZNF267	chr16:31885078	3.66667
NOD1	chr7:30518393	3.66667
SDHAP3	chr5:1594646	3.66667
RIT1	chr1:155881193	3.66667
RASA3	chr13:114898095	3.66667
EIF3G	chr19:10230599	3.66667
CCDC88A	chr2:55647057	3.66667
SNHG16	chr17:74553845	3.66667
HIST1H4E	chr6:26204872	3.66667
OAZ2	chr15:64995480	3.66667
ARL4A	chr7:12726451	3.66667
DNAJC27-AS1	chr2:25194980	3.66667
PJA2	chr5:108745675	3.66667
SMPD2	chr6:109761930	3.66667
THEM4	chr1:151882361	3.66667
ARID2	chr12:46123619	3.66667
FKBP8	chr19:18654383	3.66667
NPIPA2	chr16:14844669	3.66667
RHPN2	chr19:33555824	3.66667
KIF5B	chr10:32345371	3.66667
MAPT	chr17:43971747	3.66667
PDE8A	chr15:85525204	3.66667
GMIP	chr19:19754476	3.66667
MIR631	chr15:75646026	3.66667
CXXC5	chr5:139028300	3.66667
ANXA5	chr4:122618147	3.66667
RARA	chr17:38474472	3.66667
TNFAIP8	chr5:118604386	3.66667
MIR4420	chr1:31212079	3.66667
HIST1H3A	chr6:26020717	3.66667
LINC01138	chr1:143744519	3.66667
CIITA	chr16:10971054	3.66667
EMC9	chr14:24610797	3.66667
FIS1	chr7:100888371	3.66667
CUL3	chr2:225450114	3.66667
RRN3P3	chr16:22449036	3.66667
HMHA1	chr19:1071219	3.66667
HIC1	chr17:1959603	3.66667
ZMAT1	chrX:101187039	3.66667
UBE2A	chrX:118708429	3.66667
PPP6R3	chr11:68228185	3.66667
RTBDN	chr19:12945390	3.66667
LINC01461	chr1:85086714	3.66667
ZBTB22	chr6:33285512	3.66667
FAM89B	chr11:65339819	3.66667
ANAPC13	chr3:134204831	3.66667
STUB1	chr16:730110	3.66667
SPHK1	chr17:74380689	3.66667
SLC36A4	chr11:92931141	3.66667
PRNP	chr20:4667156	3.66667
ARAP2	chr4:36245979	3.66667
ACSF3	chr16:89160216	3.66667
THOC6	chr16:3074031	3.66667
MIR3074	chr9:97848376	3.66667
PPP1R18	chr6:30655672	3.66667
ATP5E	chr20:57607422	3.66667
MGC57346-CRHR1	chr17:43697694	3.66667
INTS6	chr13:52027275	3.66667
PCDH7	chr4:30722036	3.66667
GGA1	chr22:38004480	3.66667
SLC31A2	chr9:115913237	3.66667
LINC00921	chr16:3313767	3.66667
IARS	chr9:95056038	3.66667
SYNCRIP	chr6:86352608	3.66667
UBE2Z	chr17:46985730	3.66667
CERS6	chr2:169312758	3.66667
OBP2B	chr9:136084637	3.66667
CAPZB	chr1:19811201	3.66667
BRWD1	chr21:40685712	3.66667
NDUFAF3	chr3:49057907	3.66667
BASP1	chr5:17216931	3.66667
KLHL23	chr2:170590355	3.66667
CAND1.11	chr11:10329859	3.66667
CDKN2B-AS1	chr9:21994789	3.66667
ZSCAN16-AS1	chr6:28105094	3.66667
UBE2E1-AS1	chr3:23848396	3.66667
KAT6A	chr8:41909505	3.66667
TBPL1	chr6:134274300	3.66667
SYS1	chr20:43991739	3.66667
MIR1199	chr19:14184172	3.66667
LINC01003	chr7:152161208	3.66667
POFUT1	chr20:30795695	3.66667
PHOSPHO1	chr17:47308128	3.66667
LARP4B	chr10:977645	3.66667
DLEU1	chr13:50656304	3.66667
CYP2R1	chr11:14913751	3.66667
CXCR4	chr2:136875725	3.66667
SLC12A4	chr16:68000781	3.66667
DNAL4	chr22:39190161	3.66667
POMT1	chr9:134378288	3.66667
FGD5-AS1	chr3:14989012	3.66667
KIAA0930	chr22:45608347	3.66667
LIMD2	chr17:61777519	3.66667
LINC00641	chr14:21675059	3.66667
NAPA-AS1	chr19:47987538	3.66667
GPSM1	chr9:139249251	3.66667
MRPL14	chr6:44095191	3.66667
C1ORF43	chr1:154193273	3.66667
ADORA2B	chr17:15848230	3.66667
SH3BP1	chr22:38035683	3.66667
LRG1	chr19:4540036	3.66667
SNORA73B	chr1:28835069	3.66667
FKBP6	chr7:72742234	3.66667
SLTM	chr15:59225852	3.66667
APCDD1L	chr20:57089994	3.66667
C9ORF69	chr9:139010731	3.66667
PLEKHG2	chr19:39903749	3.66667
TH	chr11:2193035	3.66667
PPIB	chr15:64455354	3.66667
POLB	chr8:42195972	3.66667
LOC100499194	chr2:114737561	3.66667
GGT7	chr20:33460661	3.66667
CCL8	chr17:32646065	3.66667
HCG4B	chr6:29894992	3.66667
PHF20L1	chr8:133787603	3.66667
SMA4	chr5:69521622	3.66667
PABPC1	chr8:101734315	3.66667
DPY19L4	chr8:95732102	3.66667
IDH3B	chr20:2644865	3.66667
PCNXL3	chr11:65383782	3.66667
MRPL52	chr14:23299091	3.66667
PIP4K2B	chr17:36956158	3.66667
GPR132	chr14:105531887	3.66667
SNORA5C	chr7:45144641	3.66667
ROPN1L	chr5:10441973	3.66667
HIPK3	chr11:33279876	3.66667
DHCR7	chr11:71159477	3.66667
MIR1282	chr15:44085957	3.66667
TSC22D2	chr3:150126121	3.66667
MIR6737	chr1:153934896	3.66667
VAMP5	chr2:85811530	3.66667
SSR1	chr6:7313547	3.66667
NFS1	chr20:34287287	3.66667
C6ORF136	chr6:30614815	3.66667
SCARF1	chr17:1549083	3.66667
FGF11	chr17:7344060	3.66667
SCARNA4	chr1:155895877	3.66667
RCOR3	chr1:211432707	3.66667
DLL1	chr6:170599697	3.66667
ENKD1	chr16:67700628	3.66667
TYROBP	chr19:36399211	3.66667
ARHGEF1	chr19:42388445	3.66667
IGFBP4	chr17:38599675	3.66667
KRTCAP2	chr1:155145804	3.66667
CD1A	chr1:158223926	3.66667
SLC16A5	chr17:73084035	3.66667
FAM195A	chr16:691848	3.66667
SNRPC	chr6:34724870	3.66667
ASCL2	chr11:2292182	3.66667
SLC29A3	chr10:73079009	3.66667
TP53I3	chr2:24307201	3.66667
CCDC94	chr19:4247110	3.66667
MAP3K14-AS1	chr17:43325291	3.66667
LOC101927795	chr2:201676893	3.66667
FAM50B	chr6:3849631	3.66667
ZDHHC21	chr9:14693480	3.66667
DCXR	chr17:79995573	3.66667
FAM231D	chr1:149287450	3.66667
DHRS1	chr14:24768666	3.66667
PAX5	chr9:37034476	3.66667
FAM171A2	chr17:42441235	3.66667
LOC100996351	chr19:3155173	3.66667
TRIM65	chr17:73893084	3.66667
LINC00092	chr9:98784037	3.66667
MIR3918	chr6:159185785	3.66667
NAA10	chrX:153200607	3.66667
LENG8	chr19:54960339	3.66667
STAT6	chr12:57505196	3.66667
PDIK1L	chr1:26437655	3.66667
JHDM1D-AS1	chr7:139877060	3.66667
KREMEN2	chr16:3014216	3.66667
TEC	chr4:48271814	3.66667
PPP2R2B	chr5:146258348	3.66667
ZNF800	chr7:127032778	3.66667
TIMM13	chr19:2427914	3.66667
NDUFA6-AS1	chr22:42486936	3.66667
MIOS	chr7:7606615	3.66667
FOSL1	chr11:65667997	3.66667
PDHA1	chrX:19362010	3.66667
ATP9B	chr18:76829274	3.66667
SIGLEC9	chr19:51628136	3.66667
ROPN1L-AS1	chr5:10441963	3.66667
NR2C2	chr3:14989090	3.66667
ANTXR1	chr2:69240275	3.66667
ETV7	chr6:36355568	3.66667
SMCO4	chr11:93276546	3.66667
PLEKHO2	chr15:65134081	3.66667
BCAR3	chr1:94312706	3.66667
NPIPA3	chr16:14844669	3.66667
TFAP4	chr16:4323001	3.66667
NFE2L1	chr17:46125685	3.66667
PPP1R9B	chr17:48227878	3.66667
CDKN2C	chr1:51435641	3.66667
SIRT1	chr10:69644426	3.66667
BAALC	chr8:104152920	3.66667
GAPDH	chr12:6644384	3.66667
RPS9	chr19:54704725	3.66667
GPS2	chr17:7218658	3.66667
MIR3178	chr16:2582006	3.66667
SYT15	chr10:46970601	3.66667
REV3L	chr6:111804918	3.66667
SIN3A	chr15:75743926	3.66667
HTATSF1P2	chr6:3025005	3.66667
SDHC	chr1:161284165	3.66667
GALE	chr1:24127034	3.66667
SCAMP2	chr15:75165670	3.66667
MLNR	chr13:49794473	3.66667
UQCRC1	chr3:48647098	3.5
SNORD105	chr19:10218326	3.5
TACR2	chr10:71176674	3.5
CD55	chr1:207494816	3.5
CD27-AS1	chr12:6560683	3.5
KLHL24	chr3:183353410	3.5
CNBP	chr3:128902810	3.5
ZBTB18	chr1:244212240	3.5
PROCA1	chr17:27038925	3.5
MIR4648	chr7:2566707	3.5
GNAI2	chr3:50268207	3.5
PARP14	chr3:122399671	3.5
IFRD2	chr3:50330026	3.5
PRKCD	chr3:53195222	3.5
SERBP1	chr1:67896123	3.5
HIST1H1A	chr6:26018040	3.5
GPX1	chr3:49395791	3.5
PXK	chr3:58318616	3.5
USP17L20	chr4:9217130	3.5
CAMSAP2	chr1:200708685	3.5
ZNF672	chr1:249132376	3.5
ARL8A	chr1:202113871	3.5
USP17L11	chr4:9217130	3.5
RBM15B	chr3:51428698	3.5
NDUFS8	chr11:67798083	3.5
RHOB	chr2:20646831	3.5
PCNT	chr21:47744035	3.5
LINC01136	chr1:203274453	3.5
DALRD3	chr3:49056041	3.5
USP17L18	chr4:9217130	3.5
RWDD2B	chr21:30391685	3.5
RFTN1	chr3:16555222	3.5
TOLLIP-AS1	chr11:1330937	3.5
ARF1	chr1:228270360	3.5
DDB1	chr11:61100684	3.33333
CD38	chr4:15779930	3.33333
DUS3L	chr19:5791249	3.33333
RASA4B	chr7:102158224	3.33333
ASNSD1	chr2:190526124	3.33333
ANKRD40	chr17:48785270	3.33333
WSB1	chr17:25621105	3.33333
SERF2-C15ORF63	chr15:44084173	3.33333
SAMHD1	chr20:35580246	3.33333
LOC105377348	chr4:103749211	3.33333
2002-09-01	chr2:242254601	3.33333
PANK2	chr20:3870462	3.33333
CSNK1G2-AS1	chr19:1954548	3.33333
RPP25	chr15:75249775	3.33333
MED26	chr19:16739015	3.33333
KDM2B	chr12:122018364	3.33333
MIR6892	chr7:143079778	3.33333
ILF3-AS1	chr19:10764548	3.33333
MLYCD	chr16:83932729	3.33333
PCNA-AS1	chr20:5100231	3.33333
SLX1B	chr16:30205163	3.33333
SNORA21	chr17:37009248	3.33333
PDE6D	chr2:232646037	3.33333
DLG4	chr17:7120928	3.33333
TSSK3	chr1:32827861	3.33333
STYX	chr14:53196882	3.33333
GNB2	chr7:100271362	3.33333
KAT2A	chr17:40273382	3.33333
NAPA	chr19:48018515	3.33333
ANAPC11	chr17:79848665	3.33333
HSPE1-MOB4	chr2:198364720	3.33333
GIN1	chr5:102455842	3.33333
SNORD68	chr16:89627837	3.33333
PRR7-AS1	chr5:176874945	3.33333
ATCAY	chr19:3880617	3.33333
ITPRIP	chr10:106098251	3.33333
APOBR	chr16:28505969	3.33333
TENM4	chr11:79151695	3.33333
SERPING1	chr11:57365026	3.33333
ARFGEF2	chr20:47538274	3.33333
FHAD1	chr1:15573767	3.33333
TBC1D3L	chr17:36348623	3.33333
RAB24	chr5:176730745	3.33333
MDGA1	chr6:37665766	3.33333
DTX2	chr7:76109826	3.33333
HNRNPD	chr4:83295149	3.33333
SPAG1	chr8:101170562	3.33333
ZCCHC11	chr1:53018762	3.33333
SERF2	chr15:44069293	3.33333
POLD3	chr11:74303649	3.33333
GTF2A1	chr14:81687296	3.33333
LOC101928069	chr11:66247720	3.33333
XRCC3	chr14:104181823	3.33333
TBC1D3C	chr17:36348649	3.33333
APIP	chr11:34937958	3.33333
GLTSCR1	chr19:48111452	3.33333
BANP	chr16:87985037	3.33333
CYP51A1	chr7:91763840	3.33333
LOC100132111	chr1:151810944	3.33333
CISD1	chr10:60028861	3.33333
ZNF282	chr7:148892553	3.33333
NTN5	chr19:49176338	3.33333
TRPC4AP	chr20:33680618	3.33333
ADPRHL2	chr1:36554452	3.33333
EIF4G2	chr11:10829543	3.33333
NCF4	chr22:37257029	3.33333
EIF4G3	chr1:21503381	3.33333
APOE	chr19:45409657	3.33333
BIRC7	chr20:61867234	3.33333
COQ10B	chr2:198318230	3.33333
HPS1	chr10:100206704	3.33333
TBC1D3	chr17:36348621	3.33333
TRIM47	chr17:73874656	3.33333
MIR7846	chr1:12226999	3.33333
GPAM	chr10:113943537	3.33333
THAP9-AS1	chr4:83822069	3.33333
FOSB	chr19:45971252	3.33333
FAM47E	chr4:77135192	3.33333
HSPB2-C11ORF52	chr11:111783459	3.33333
ABCA5	chr17:67323323	3.33333
KANK1	chr9:470293	3.33333
BCL2L12	chr19:50168398	3.33333
DUSP22	chr6:292056	3.33333
UBE2I	chr16:1359153	3.33333
PAQR6	chr1:156217908	3.33333
TEX261	chr2:71222001	3.33333
TAPBP	chr6:33282164	3.33333
LOC102723859	chr17:36348607	3.33333
APAF1	chr12:99039077	3.33333
ENTHD2	chr17:79212891	3.33333
CHCHD1	chr10:75541807	3.33333
AIF1	chr6:31583788	3.33333
MMP24-AS1	chr20:33865960	3.33333
TBL1X	chrX:9431334	3.33333
NME2	chr17:49244082	3.33333
CYB5R1	chr1:202936404	3.33333
COMMD10	chr5:115420726	3.33333
MIR6501	chr21:34922967	3.33333
HLA-DMA	chr6:32920899	3.33333
WSB2	chr12:118499979	3.33333
MMP25	chr16:3096681	3.33333
PGLS	chr19:17622431	3.33333
URAHP	chr16:90114033	3.33333
SNORD33	chr19:49993873	3.33333
HIST1H2BF	chr6:26199786	3.33333
ENOSF1	chr18:712517	3.33333
MIR4647	chr6:44222022	3.33333
POGZ	chr1:151431941	3.33333
PLD6	chr17:17109646	3.33333
TP73-AS1	chr1:3663335	3.33333
PAEP	chr9:138453603	3.33333
CREB3	chr9:35732316	3.33333
FUOM	chr10:135171529	3.33333
USP11	chrX:47092313	3.33333
PDCD6IP	chr3:33840062	3.33333
TXNL4A	chr18:77748592	3.33333
FBXO30	chr6:146135921	3.33333
HMGCR	chr5:74632992	3.33333
SMAD2	chr18:45457517	3.33333
TMEM68	chr8:56685966	3.33333
ZNF408	chr11:46722643	3.33333
VARS	chr6:31763712	3.33333
ABHD11-AS1	chr7:73149398	3.33333
ZNF438	chr10:31320866	3.33333
ETFB	chr19:51869672	3.33333
RPL8	chr8:146017729	3.33333
TRAPPC3	chr1:36615115	3.33333
RRP7BP	chr22:42978017	3.33333
CD81-AS1	chr11:2399222	3.33333
PLCB2	chr15:40600174	3.33333
NDUFA6	chr22:42486888	3.33333
CCL3L3	chr17:34625721	3.33333
DPRXP4	chr17:29302352	3.33333
ARHGEF2	chr1:155947966	3.33333
HSPB2	chr11:111783459	3.33333
FAM99B	chr11:1706859	3.33333
CLDN15	chr7:100882101	3.33333
BACE1	chr11:117166386	3.33333
TSPAN10	chr17:79604196	3.33333
MRPL39	chr21:26979801	3.33333
HJURP	chr2:234763212	3.33333
KCNC4	chr1:110753335	3.33333
FLJ32255	chr5:42993435	3.33333
CHERP	chr19:16653263	3.33333
TXN	chr9:113018920	3.33333
MIR4281	chr5:176056501	3.33333
PGPEP1	chr19:18451407	3.33333
LOC102724862	chr17:36348609	3.33333
NME1-NME2	chr17:49230896	3.33333
LINC01270	chr20:48909256	3.33333
SLITRK4	chrX:142722319	3.33333
SLX1A	chr16:30205163	3.33333
ZNF324	chr19:58978411	3.33333
ZNF511	chr10:135122392	3.33333
OXA1L	chr14:23235730	3.33333
SOX15	chr17:7493488	3.33333
TSTD1	chr1:161008774	3.33333
PDCD6	chr5:271735	3.33333
NKX3-1	chr8:23540402	3.33333
WDR74	chr11:62607628	3.33333
FUT11	chr10:75532048	3.33333
TLK2	chr17:60556385	3.33333
PIK3R6	chr17:8770994	3.33333
FKBP11	chr12:49318664	3.33333
FLII	chr17:18161870	3.33333
MIR6748	chr11:62557286	3.33333
EXO5	chr1:40974432	3.33333
STOM	chr9:124132582	3.33333
MIR4269	chr2:240227156	3.33333
VPS37C	chr11:60928916	3.33333
ELP5	chr17:7155519	3.33333
MIR5087	chr1:147806678	3.33333
MIR616	chr12:57913042	3.33333
RASD1	chr17:17399709	3.33333
DUT	chr15:48624364	3.33333
GAS7	chr17:9940064	3.33333
MDN1	chr6:90529513	3.33333
LMNA	chr1:156084460	3.33333
ATG16L1	chr2:234160216	3.33333
FAM21C	chr10:46222647	3.33333
COX7A2L	chr2:42588356	3.33333
MRPL38	chr17:73901181	3.33333
CDKL3	chr5:133702765	3.33333
TPT1	chr13:45915419	3.33333
ZBED6	chr1:203766650	3.33333
COPE	chr19:19030199	3.33333
ARHGAP1	chr11:46722215	3.33333
DNAJC27	chr2:25194963	3.33333
HSPE1	chr2:198364720	3.33333
TRIM28	chr19:59055835	3.33333
PLGRKT	chr9:5437937	3.33333
CASP9	chr1:15850940	3.33333
USP36	chr17:76836969	3.33333
LYZ	chr12:69742133	3.33333
ZNF252P	chr8:146228285	3.33333
SREBF1	chr17:17740325	3.33333
ZBTB25	chr14:64971931	3.33333
MIR29A	chr7:130561569	3.33333
LOC104968399	chr18:3261828	3.33333
HTRA4	chr8:38831667	3.33333
GABARAP	chr17:7145753	3.33333
SLC22A18	chr11:2923511	3.33333
MRPS34	chr16:1823140	3.33333
BDNF	chr11:27721214	3.33333
ENO1-AS1	chr1:8938893	3.33333
PRAF2	chrX:48931704	3.33333
MIR4489	chr11:65416662	3.33333
STX3	chr11:59522531	3.33333
SLC25A25	chr9:130830478	3.33333
CCNO	chr5:54529545	3.33333
ZNF302	chr19:35168543	3.33333
NEU4	chr2:242750159	3.33333
OXSR1	chr3:38207025	3.33333
CD164L2	chr1:27709823	3.33333
USP17L17	chr4:9245604	3.33333
PGM3	chr6:83903655	3.33333
CDHR2	chr5:175969511	3.33333
KCNMA1	chr10:79397577	3.33333
ZFYVE1	chr14:73493920	3.33333
IL17C	chr16:88705000	3.33333
LOC153684	chr5:43042235	3.33333
MIRLET7E	chr19:52196038	3.33333
GCGR	chr17:79762007	3.33333
YBX1	chr1:43148065	3.33333
RPL28	chr19:55897299	3.33333
GSTZ1	chr14:77787705	3.33333
C9ORF16	chr9:130922538	3.33333
ITGAL	chr16:30483982	3.33333
BTAF1	chr10:93683735	3.33333
DNASE1	chr16:3702939	3.33333
MIR27A	chr19:13947331	3.33333
ARF4	chr3:57583215	3.33333
PPP6R1	chr19:55770038	3.33333
SNORA44	chr1:28907024	3.33333
LOC101060389	chr17:36348609	3.33333
SYNGR2	chr17:76164670	3.33333
SETD6	chr16:58549382	3.33333
KRI1	chr19:10676702	3.33333
PUS7L	chr12:44152561	3.33333
CCDC154	chr16:1494490	3.33333
PEX3	chr6:143771917	3.33333
ERF	chr19:42758787	3.33333
SRSF9	chr12:120907558	3.33333
ULK2	chr17:19771239	3.33333
OAZ1	chr19:2269484	3.33333
GOLGA4	chr3:37284681	3.33333
MIR4632	chr1:12251769	3.33333
ZNF131	chr5:43121002	3.33333
ALOX15P1	chr17:6561037	3.33333
MIR1914	chr20:62572897	3.33333
METTL12	chr11:62432778	3.33333
PNPLA6	chr19:7599635	3.33333
FAM229A	chr1:32827844	3.33333
TMEM176A	chr7:150497853	3.33333
ZNF354A	chr5:178157703	3.33333
C19ORF48	chr19:51307811	3.33333
MIR3661	chr5:133561447	3.33333
CFL1	chr11:65625804	3.33333
OSBPL1A	chr18:21977833	3.33333
NOP14	chr4:2965233	3.33333
NPLOC4	chr17:79604179	3.33333
SGMS1-AS1	chr10:52384710	3.33333
TBC1D3K	chr17:36348609	3.33333
CACNA1G	chr17:48638428	3.33333
KMT2E	chr7:104654636	3.33333
ZNF596	chr8:182549	3.33333
GM2A	chr5:150632612	3.33333
IRAK3	chr12:66582977	3.33333
LIPA	chr10:91011665	3.33333
HNRNPUL1	chr19:41770226	3.33333
CISD2	chr4:103790134	3.33333
ICOSLG	chr21:45660887	3.33333
ILF3	chr19:10764936	3.33333
COASY	chr17:40714091	3.33333
EPHA1	chr7:143105985	3.33333
TAGLN	chr11:117070039	3.33333
MGME1	chr20:17949761	3.33333
FNDC3A	chr13:49550047	3.33333
MICB	chr6:31462657	3.33333
UBAP2L	chr1:154193324	3.33333
NFKBIB	chr19:39390569	3.33333
HLA-L	chr6:30227338	3.33333
PKM	chr15:72523727	3.33333
SLCO4C1	chr5:101632253	3.33333
TRAF3IP2-AS1	chr6:111804674	3
APBB2	chr4:41216635	3
BRIX1	chr5:34915819	3
BOLA3-AS1	chr2:74375107	3
PROSC	chr8:37620100	3
PLEKHG4	chr16:67313426	3
PDP1	chr8:94929278	3
ARAP1	chr11:72433403	3
SMC6	chr2:17935096	3
MIR5010	chr17:40666205	3
DCTN1	chr2:74601862	3
ZNF614	chr19:52531680	3
TSEN54	chr17:73512608	3
SMG1P5	chr16:30346695	3
TMEM255B	chr13:114462215	3
SIGLEC15	chr18:43405544	3
GFOD1	chr6:13408369	3
SHISA4	chr1:201857804	3
TRIM52-AS1	chr5:180688212	3
P2RX1	chr17:3819960	3
TAF8	chr6:42018250	3
STAMBPL1	chr10:90639943	3
OST4	chr2:27294567	3
PRKAR2A	chr3:48885270	3
ATP6V0B	chr1:44440319	3
RASAL1	chr12:113574044	3
ACBD5	chr10:27529808	3
MTF1	chr1:38325292	3
RRP36	chr6:42989384	3
MRPL20	chr1:1342693	3
C1ORF167	chr1:11822249	3
SNORD34	chr19:49994163	3
RQCD1	chr2:219433302	3
IFRD1	chr7:112090562	3
RAP2B	chr3:152880000	3
HMGB2	chr4:174254920	3
GADD45G	chr9:92219926	3
CCNL1	chr3:156878482	3
DNASE2	chr19:12992335	3
NUDT11	chrX:51239459	3
MBNL1	chr3:151985828	3
LOH12CR2	chr12:12510001	3
CIRBP	chr19:1269266	3
MMP25-AS1	chr16:3109371	3
FTSJ2	chr7:2281833	3
VAV3	chr1:108507545	3
PAK2	chr3:196466727	3
RAB2A	chr8:61429468	3
INPP5E	chr9:139334256	3
TCF25	chr16:89939993	3
LRRC8D	chr1:90286572	3
DNAJC5	chr20:62526454	3
UGT2B4	chr4:70391732	3
CMYA5	chr5:78985658	3
C3ORF38	chr3:88198892	3
FDFT1	chr8:11660597	3
LINC00324	chr17:8127361	3
TEX10	chr9:103114853	3
GEMIN4	chr17:655501	3
UBE2K	chr4:39699663	3
CDR2L	chr17:72983726	3
HUNK	chr21:33245627	3
ZFP91-CNTF	chr11:58346586	3
EEF1A2	chr20:62130668	3
SEC16A	chr9:139378211	3
LINC00476	chr9:98638259	3
LILRB3	chr19:54746711	3
FAM175B	chr10:126490353	3
GSPT1	chr16:12009825	3
ARPC4	chr3:9834231	3
ADIPOR1	chr1:202927112	3
MKI67	chr10:129924468	3
RPS27L	chr15:63449741	3
SYCE1L	chr16:77233348	3
MIR3960	chr9:130548111	3
RNASEH1	chr2:3605961	3
DNAJB1	chr19:14628674	3
GIMAP8	chr7:150147717	3
SLC39A7	chr6:33168602	3
MAPKAP1	chr9:128469513	3
LOC91450	chr15:78286567	3
UBQLN4	chr1:156023616	3
IFIT2	chr10:91061705	3
C16ORF13	chr16:686366	3
TTC39C	chr18:21594383	3
MTMR10	chr15:31283807	3
GABPB1	chr15:50647605	3
PTCH1	chr9:98270831	3
VPS13A	chr9:79792360	3
C2CD5	chr12:22697480	3
SS18	chr18:23670611	3
CD244	chr1:160832692	3
BCL2L11	chr2:111878490	3
YIPF1	chr1:54355487	3
ABI1	chr10:27150016	3
MIR6777	chr17:17716859	3
SNORA28	chr14:103804185	3
ATP2A1-AS1	chr16:28891242	3
PAXBP1-AS1	chr21:34100424	3
TDRD1	chr10:115939028	3
C6ORF1	chr6:34216885	3
TBC1D9	chr4:141677471	3
ZBTB49	chr4:4291923	3
PDLIM2	chr8:22436253	3
UFSP1	chr7:100487339	3
ZNF623	chr8:144718331	3
TIMM22	chr17:900356	3
C21ORF58	chr21:47743771	3
STAT5A	chr17:40439564	3
YIPF2	chr19:11039688	3
AHR	chr7:17338275	3
NDUFA13	chr19:19627018	3
WNT6	chr2:219724545	3
RPN1	chr3:128369719	3
RBM7	chr11:114271250	3
TERF2	chr16:69419891	3
MIR17HG	chr13:92000073	3
FOXN2	chr2:48541794	3
DTWD2	chr5:118324240	3
CEMP1	chr16:2581409	3
C11ORF71	chr11:114271272	3
RPP30	chr10:92631708	3
C17ORF107	chr17:4802947	3
NCK1-AS1	chr3:136580905	3
SPEG	chr2:220325533	3
XPO6	chr16:28223239	3
MOV10L1	chr22:50528684	3
TMEM221	chr19:17559376	3
OIT3	chr10:74653313	3
RAB32	chr6:146864827	3
HEXA-AS1	chr15:72668453	3
SNORA10	chr16:2012467	3
SNHG12	chr1:28908366	3
LENG8-AS1	chr19:54960216	3
MXRA8	chr1:1293927	3
RBM33	chr7:155437202	3
CYP21A2	chr6:32006092	3
LINC00925	chr15:89921272	3
COX17	chr3:119396243	3
ANTXR2	chr4:80994477	3
PPTC7	chr12:111021064	3
LOH12CR1	chr12:12510012	3
HSPA6	chr1:161494329	3
ADO	chr10:64564515	3
SLC4A7	chr3:27525911	3
SPCS1	chr3:52739856	3
2001-03-01	chr1:220960038	3
AGBL5-AS1	chr2:27273132	3
MCL1	chr1:150552214	3
TIGD7	chr16:3355439	3
C16ORF59	chr16:2510114	3
TUBGCP2	chr10:135122660	3
CXCL12	chr10:44880545	3
LOC643770	chr12:98897633	3
MIR191	chr3:49058142	3
SETDB2	chr13:50018428	3
PPAP2B	chr1:57045257	3
CTDSP1	chr2:219264477	3
MIR4777	chr2:232227418	3
SPECC1L-ADORA2A	chr22:24666784	3
GDI2	chr10:5855512	3
DNAJB5	chr9:34990266	3
TLR9	chr3:52260179	3
LOC100268168	chr5:172385778	3
NADK2	chr5:36242381	3
NSMCE4A	chr10:123734743	3
HMGN1	chr21:40721047	3
SRRM2-AS1	chr16:2802601	3
OXLD1	chr17:79633176	3
C22ORF46	chr22:42086546	3
DNMT3B	chr20:31350190	3
MIR147B	chr15:45725247	3
UBL7	chr15:74753529	3
SLC17A9	chr20:61583998	3
SEC13	chr3:10362725	3
CRCP	chr7:65579804	3
WIPI2	chr7:5229834	3
SGK2	chr20:42193754	3
MIR4745	chr19:804939	3
PPP1CA	chr11:67169376	3
LINC00536	chr8:117337297	3
OARD1	chr6:41040188	3
ZFX-AS1	chrX:24167771	3
LBX2	chr2:74726685	3
BLCAP	chr20:36156083	3
SULT1A3	chr16:29471206	3
MIR3142	chr5:159901408	3
NKPD1	chr19:45663408	3
SLC39A8	chr4:103266348	3
MRPS15	chr1:36930040	3
WDR37	chr10:1102775	3
FDPSP2	chr7:76104317	3
PARP9	chr3:122283147	3
LOC401242	chr6:28831454	3
CLCN6	chr1:11866152	3
CCL4L2	chr17:34538464	3
RNF138P1	chr5:54830370	3
SEC31B	chr10:102279595	3
FOXD3	chr1:63788729	3
C11ORF94	chr11:45928833	3
LINC01023	chr5:108063962	3
PPP3CC	chr8:22298482	3
CDPF1	chr22:46646193	3
TARS	chr5:33440881	3
LIG4	chr13:108867882	3
SIT1	chr9:35650947	3
SH2D3A	chr19:6767523	3
DRC1	chr2:26624783	3
PPP4R1-AS1	chr18:9615261	3
HPCAL1	chr2:10508889	3
GNMT	chr6:42928499	3
SRSF1	chr17:56084707	3
EIF2A	chr3:150264573	3
NCBP1	chr9:100395704	3
TMEM131	chr2:98612354	3
MIR155HG	chr21:26934456	3
OGFR	chr20:61436176	3
UBXN1	chr11:62446589	3
NIPBL-AS1	chr5:36876796	3
MRPL45P2	chr17:45569986	3
RUSC1-AS1	chr1:155293938	3
ANXA4	chr2:69969126	3
PTCH2	chr1:45308616	3
[truncated: 24,284 more rows]
