# Supplementary material for: Modulation of macrophage inflammatory function through selective inhibition of the epigenetic reader protein SP140
Source: BMC Biol. 2022 Aug 19;20:182. doi: 10.1186/s12915-022-01380-6 (PMC9392322; doi:10.1186/s12915-022-01380-6)
Supplement: Supplementary file 11 — Additional file 11: Table 11. The normalized read count for ChIP-seq (GSK761-pretreated “M1” macrophages). [file 12915_2022_1380_MOESM11_ESM.xlsx]

## Sheet: Sheet1
#H:hugo	tss_for_gene	The normalized read count
MIR3687-2	chr21:9826202	128
MIR3687-1	chr21:9826202	128
SERPINA1	chr14:94855153	112.333
MIR3648-2	chr21:9825831	33
MIR3648-1	chr21:9825831	33
MIR663A	chr20:26188914	31.6667
ROCK1P1	chr18:109064	26
MIR6087	chrX:108297771	22.3333
MIR8078	chr18:112339	16.3333
DUSP5P1	chr1:228780656	13.3333
MIR7641-2	chr1:228779635	9.33333
REXO1L2P	chr8:86815790	9.33333
SH3KBP1	chrX:19905744	6.66667
TCEB3CL	chr18:44550298	5.33333
LOC284412	chr19:37759912	5
RHOU	chr1:228780393	4.66667
USP17L9P	chr4:9360107	4.66667
TCEB3C	chr18:44556449	4.33333
SNAR-A10	chr19:50604268	4
SNAR-A7	chr19:50604268	4
PI4KA	chr22:21213100	4
SNAR-A3	chr19:50604268	4
SNAR-A4	chr19:50604268	4
SNAR-A5	chr19:50604268	4
SNAR-A14	chr19:50604268	4
SNAR-A8	chr19:50604268	4
SNAR-A6	chr19:50604268	4
SNAR-A11	chr19:50604268	4
SNAR-A9	chr19:50604268	4
SNAR-C3	chr19:48453552	4
GAGE12D	chrX:49334991	3.5
STAG2	chrX:123094409	3.33333
GAGE12C	chrX:49335002	3.33333
GAGE12E	chrX:49335002	3.33333
FLJ36000	chr17:21904061	3.33333
FLOT1	chr6:30710453	3.33333
SNAR-C4	chr19:48442797	3.33333
GAGE12G	chrX:49335002	3.33333
USP17L15	chr4:9236110	3.33333
GAGE6	chrX:49335037	3.33333
TCEB3CL2	chr18:44544607	3.33333
WASH7P	chr1:29370	3
GAGE12I	chrX:49335064	3
PF4	chr4:74847841	3
HSPA8	chr11:122933043	3
GAGE12H	chrX:49344551	3
GAGE1	chrX:49363615	3
FOXI1	chr5:169532916	3
NBPF25P	chr1:145289769	3
EFNA3	chr1:155051347	3
GAGE12F	chrX:49315857	3
LOC654342	chr2:91847975	2.66667
PRR20B	chr13:57734765	2.66667
MIR4283-2	chr7:63081467	2.66667
GAGE12B	chrX:49315926	2.66667
GXYLT1	chr12:42538673	2.66667
MIR4283-1	chr7:63081467	2.66667
MIR663B	chr2:133014653	2.66667
PRR20C	chr13:57734765	2.66667
PRR20D	chr13:57734765	2.66667
PRR20A	chr13:57734765	2.66667
PRR20E	chr13:57734765	2.66667
USP17L29	chr4:9341128	2.5
USP17L28	chr4:9341128	2.5
USP17L30	chr4:9341128	2.5
USP17L26	chr4:9341128	2.5
USP17L27	chr4:9341128	2.5
USP17L5	chr4:9341128	2.5
USP17L25	chr4:9341128	2.5
USP17L6P	chr4:9369599	2.5
USP17L24	chr4:9341128	2.5
HDDC3	chr15:91475799	2.33333
GAGE12J	chrX:49178508	2.33333
HERC2P7	chr15:23390721	2.33333
USP17L10	chr4:9212382	2.33333
MIR4688	chr11:46397951	2.33333
FAM138F	chr19:77690	2
CCDC6	chr10:61666414	2
CTSB	chr8:11725646	2
TNFRSF8	chr1:12123433	2
NYNRIN	chr14:24867991	2
MIR1258	chr2:180725635	2
SNX16	chr8:82754521	2
FAM138A	chr19:77690	2
NUB1	chr7:151038846	2
GOLGA6B	chr15:72947037	2
LINC00869	chr1:149576160	2
MIR181D	chr19:13985688	2
MIR4477B	chr9:68415307	2
HMCES	chr3:128997816	2
LINC01419	chr8:84315992	2
ADAMTS9	chr3:64673365	2
TTBK2	chr15:43213007	2
WDR45	chrX:48937564	2
NDUFB8	chr10:102289680	2
UGT1A1	chr2:234668918	2
DLEU2	chr13:50699677	2
TAAR5	chr6:132910877	2
LSAMP-AS1	chr3:116078870	2
LOC100288778	chr12:87983	2
LOC645166	chr1:148928312	2
ANKRD34C-AS1	chr15:79576287	2
SYBU	chr8:110661132	2
GRP	chr18:56887399	2
HYAL1	chr3:50349812	2
LOC286297	chr9:67032072	2
LINC01600	chr6:2634837	1.66667
LOC101927239	chr17:32510651	1.66667
CT47A1	chrX:120114778	1.66667
MYADML	chr2:33953284	1.66667
CT47A12	chrX:120114778	1.66667
CT47A11	chrX:120114778	1.66667
CT47A5	chrX:120114778	1.66667
YTHDF2	chr1:29063451	1.66667
CT47A9	chrX:120114778	1.66667
WASH2P	chr2:114341229	1.66667
FAM27B	chr9:67794189	1.66667
LOC79999	chr17:19122694	1.66667
CALHM3	chr10:105238997	1.66667
CT47A4	chrX:120114778	1.66667
PRKAR1A	chr17:66409763	1.66667
EMILIN3	chr20:39995498	1.66667
CT47A8	chrX:120114778	1.66667
CT47A3	chrX:120114778	1.66667
TLDC2	chr20:35504523	1.66667
LOC388436	chr17:19122694	1.66667
USP17L17	chr4:9245604	1.66667
CT47A2	chrX:120114778	1.66667
CT47A10	chrX:120114778	1.66667
CT47A6	chrX:120114778	1.66667
PARK7	chr1:8021713	1.5
LINC01448	chr7:42746046	1.5
RNVU1-19	chr1:147994145	1.5
DYNLRB1	chr20:33104188	1.5
GABRR1	chr6:89941007	1.5
MTRNR2L2	chr5:79946854	1.5
MADD	chr11:47291670	1.5
LINC01484	chr5:173173212	1.5
EXD3	chr9:140317714	1.5
HMGCS2	chr1:120311555	1.5
FTH1	chr11:61735132	1.5
LOC101928626	chr1:564389	1.5
GOLGA6A	chr15:74374891	1.5
MIR4477A	chr9:68415388	1.33333
USP17L22	chr4:9269344	1.33333
APOC4	chr19:45445494	1.33333
SNAR-A1	chr19:48421685	1.33333
APOC4-APOC2	chr19:45445494	1.33333
SNAR-C2	chr19:48416307	1.33333
SNAR-A2	chr19:48421685	1.33333
USP17L20	chr4:9217130	1.33333
SNAR-C5	chr19:48416307	1.33333
CT45A7	chrX:134866414	1.33333
SNAR-C1	chr19:48416307	1.33333
USP17L11	chr4:9217130	1.33333
NT5C1A	chr1:40137710	1.33333
LOC441081	chr5:69782327	1.33333
LINC01410	chr9:66457288	1.33333
USP17L18	chr4:9217130	1.33333
LOC101928222	chr2:20189964	1
TRAPPC9	chr8:141468678	1
TP53TG3C	chr16:33262119	1
ASS1	chr9:133320093	1
SMC6	chr2:17935096	1
HID1	chr17:72968900	1
RNU6-2	chr15:68132383	1
PSMB8	chr6:32812712	1
PIGT	chr20:44044706	1
LOC102724511	chr6:170475865	1
HMBS	chr11:118955586	1
2007-09-01	chr7:35840595	1
ADGRF5	chr6:46889714	1
ACR	chr22:51176651	1
FRMD8P1	chrX:64772301	1
RGPD3	chr2:107084801	1
GOLGA8R	chr15:30706463	1
GALNS	chr16:88923374	1
DEPDC7	chr11:33037727	1
SLX1B	chr16:29465821	1
DUXAP8	chr22:16193009	1
ZNF581	chr19:56154985	1
GRIN2C	chr17:72856966	1
CCDC81	chr11:86085777	1
MIR1288	chr17:16185327	1
PHF19	chr9:123657174	1
ANKRD30BL	chr2:133015542	1
HERC2P4	chr16:32199434	1
MIR3928	chr22:31556105	1
PILRB	chr7:99955625	1
SAP130	chr2:128784869	1
AKAP1	chr17:55163134	1
CCDC33	chr15:74528629	1
SCML1	chrX:17755568	1
HEMK1	chr3:50606908	1
MPG	chr16:127017	1
ARHGAP22	chr10:49864310	1
WSPAR	chr5:133249367	1
GSKIP	chr14:96829788	1
UBXN10-AS1	chr1:20512979	1
SUSD2	chr22:24577443	1
LOC100996249	chr7:112258119	1
CCDC124	chr19:18045904	1
BRWD1-AS1	chr21:40687632	1
MICU1	chr10:74385949	1
ARL2BP	chr16:57279037	1
UGT2B4	chr4:70391732	1
POM121L9P	chr22:24647588	1
FDFT1	chr8:11665925	1
H2AFB3	chrX:154689596	1
PRMT1	chr19:50180408	1
LOC284825	chr21:29462721	1
MIR3670-3	chr16:16400226	1
PROCA1	chr17:27038109	1
INSM1	chr20:20348764	1
TEDDM1	chr1:182369751	1
LOC101927583	chr12:58015686	1
PAOX	chr10:135192740	1
ARPC4	chr3:9834800	1
LPPR1	chr9:103791030	1
LINC01115	chr2:864112	1
SMG7	chr1:183441505	1
ANKRD33	chr12:52281792	1
TREML1	chr6:41122087	1
TTLL5	chr14:76127550	1
GTF2A1	chr14:81687296	1
LINC00623	chr1:149576466	1
MAP2K6	chr17:67410837	1
KIR3DX1	chr19:55043908	1
OTP	chr5:76934522	1
CENPBD1P1	chr19:59086765	1
PTCH1	chr9:98270831	1
DUXAP10	chr14:19650031	1
TMEM158	chr3:45267814	1
PCDH8	chr13:53422775	1
EIF3C	chr16:28699878	1
PYY2	chr17:26553588	1
SNAR-B2	chr19:50642494	1
LOC389247	chr4:184425668	1
SNORD48	chr6:31803039	1
UNC93B1	chr11:67771595	1
GPR89A	chr1:145827103	1
ZNF770	chr15:35280497	1
ZNFX1	chr20:47894756	1
USP17L21	chr4:9264597	1
FMN2	chr1:240255184	1
VPS4A	chr16:69345286	1
TRIB3	chr20:361272	1
PLCXD2	chr3:111393522	1
TCP11X2	chrX:101726732	1
LYPD3	chr19:43969831	1
LOC101928605	chr7:143892413	1
IL15RA	chr10:6020150	1
SUPT16H	chr14:21852425	1
CCER2	chr19:39402798	1
MIR6855	chr9:132631883	1
MAGEA10	chrX:151307050	1
PABPN1	chr14:23789396	1
OSBP2	chr22:31277667	1
ATXN2L	chr16:28834368	1
MAGEA10-MAGEA5	chrX:151307050	1
TM9SF1	chr14:24664942	1
RFWD2	chr1:176176380	1
RASD2	chr22:35937351	1
LMF1	chr16:1020984	1
TCF12	chr15:57511654	1
MYNN	chr3:169490852	1
SLC6A18	chr5:1225469	1
LINC00917	chr16:86379285	1
RIPK2	chr8:90769974	1
GRSF1	chr4:71705220	1
CBWD5	chr9:69262630	1
FOXD4L4	chr9:42718065	1
KRT6A	chr12:52887181	1
PTPN7	chr1:202130716	1
TNFAIP1	chr17:26662547	1
LINC00395	chr13:64312151	1
H2AFB1	chrX:154689596	1
GOLGA2P10	chr15:82798399	1
MLF2	chr12:6862636	1
GOLGA6C	chr15:75550898	1
C5ORF24	chr5:134181657	1
TMEM132B	chr12:126106997	1
CEP57	chr11:95523624	1
DPYSL3	chr5:146889619	1
RAB3IP	chr12:70172731	1
ZNF718	chr4:53192	1
PIK3R5	chr17:8869029	1
POLR1E	chr9:37485931	1
PLD6	chr17:17109646	1
MYH2	chr17:10452940	1
LOC101928381	chr9:70374924	1
IMPA2	chr18:11981426	1
UCK1	chr9:134406662	1
OR13C5	chr9:107361694	1
TMED3	chr15:79603403	1
PRKCZ	chr1:2005424	1
TSIX	chrX:73012039	1
SLC2A14	chr12:8043792	1
LOC100192426	chr18:8367032	1
SH3BP5	chr3:15382901	1
MIR3670-4	chr16:16400226	1
NPIPA8	chr16:18426519	1
LOC388692	chr1:149287129	1
LPIN1	chr2:11817704	1
OBP2B	chr9:136084637	1
LOC102546226	chr5:87734907	1
MYO1B	chr2:192110253	1
C1R	chr12:7245043	1
NDUFAF3	chr3:49057907	1
ATF3	chr1:212788359	1
SLC8A3	chr14:70655787	1
TNNI3	chr19:55669100	1
IL13RA2	chrX:114252207	1
MIR410	chr14:101532248	1
LINC01296	chr14:19650036	1
LINC01160	chr1:112150940	1
ETV4	chr17:41607803	1
LOC101927811	chr7:20371385	1
KIAA2026	chr9:6008003	1
CD46	chr1:207925382	1
MST1L	chr1:17090975	1
MIR6723	chr1:567793	1
SNORD114-24	chr14:101451113	1
OR2A1-AS1	chr7:143892413	1
TSPAN10	chr17:79604196	1
STX12	chr1:28099693	1
PPFIBP2	chr11:7618416	1
MIR1307	chr10:105154158	1
CLK4	chr5:178054054	1
DUSP4	chr8:29206322	1
FOXM1	chr12:2986321	1
C14ORF1	chr14:76127538	1
SLX1A	chr16:29465821	1
PEX16	chr11:45939674	1
PRSS56	chr2:233385172	1
IGSF8	chr1:160068439	1
HP	chr16:72088507	1
LY6G6E	chr6:31681842	1
MTRNR2L8	chr11:10530723	1
PELI3	chr11:66234335	1
SNAR-B1	chr19:50642494	1
UNKL	chr16:1429684	1
NUP210P1	chr3:126380923	1
LOC103091866	chr1:149576261	1
CBWD1	chr9:179075	1
RNF167	chr17:4843629	1
TSPY2	chrY:6114263	1
TRIM11	chr1:228594517	1
ARHGEF4	chr2:131674223	1
MIR5197	chr5:143059424	1
SAMD15	chr14:77843761	1
LOC645752	chr15:78219188	1
TP53TG3	chr16:33262117	1
LOC101060524	chr1:148901844	1
SNORD62A	chr9:134365872	1
NCOA7	chr6:126111908	1
FLVCR2	chr14:76071804	1
TBC1D31	chr8:124084919	1
PLEKHA3	chr2:179345198	1
UBE2B	chr5:133706866	1
C15ORF40	chr15:83680393	1
LOC100996325	chr5:612325	1
GTF2A1L	chr2:48844918	1
PHYHIPL	chr10:60937226	1
EDEM1	chr3:5229358	1
SNAR-A12	chr19:48448178	1
LCN6	chr9:139642980	1
MSLN	chr16:811072	1
GAS7	chr17:10101868	1
MCM3AP	chr21:47705308	1
SMA4	chr5:69521622	1
AES	chr19:3062964	1
CDKL3	chr5:133706738	1
LAMTOR2	chr1:156024516	1
RBPJ	chr4:26321331	1
MIR548AX	chr4:16623654	1
TEN1	chr17:73975297	1
AGTRAP	chr1:11796141	1
TMPRSS11BNL	chr4:69083798	1
TMEM25	chr11:118401802	1
RASSF4	chr10:45455218	1
PLA2G6	chr22:38577761	1
IFT43	chr14:76452095	1
AURKAIP1	chr1:1310562	1
MIR6803	chr19:55756618	1
BRPF1	chr3:9773433	1
MIR1289-2	chr5:132763398	1
PSD	chr10:104179484	1
CBWD6	chr9:69262593	1
SMIM6	chr17:73642645	1
PEX5	chr12:7342440	1
IQSEC3	chr12:186541	1
CDYL	chr6:4836331	1
NEURL2	chr20:44519926	1
MIR320D1	chr13:41302011	1
LINC00898	chr22:48027318	1
LINC01517	chr10:29032578	1
DPP10-AS1	chr2:115918920	1
B4GALT6	chr18:29264686	1
MIR3670-1	chr16:16400226	1
SLC4A2	chr7:150755298	1
SPDYC	chr11:64937706	1
STXBP5L	chr3:120627049	1
RYR2	chr1:237205701	1
OCSTAMP	chr20:45179213	1
KRT85	chr12:52758406	1
RNF185	chr22:31556137	1
LOC727751	chr15:83182973	1
PPIEL	chr1:40025370	1
GOLGA6L9	chr15:82722987	1
SNORD62B	chr9:134365872	1
ADAMTS6	chr5:64777704	1
LOC100506258	chr11:7487066	1
SFTA3	chr14:36982990	1
GOLGA8K	chr15:32695493	1
FSIP2	chr2:186603354	1
LOC728613	chr5:1634120	1
PDE4DIP	chr1:144932365	1
TAB3	chrX:30907511	1
S100A12	chr1:153348075	1
COMMD6	chr13:76112008	1
LOC284930	chr22:48027422	1
SRGAP2-AS1	chr1:121139765	1
HECA	chr6:139456248	1
LOC100133920	chr9:69651360	1
MAP3K5	chr6:137113656	1
NPIPA7	chr16:18426519	1
ZNF595	chr4:53178	1
USP17L12	chr4:9264597	1
ALG13	chrX:110924397	1
AIM1	chr6:106959729	1
SNAR-A13	chr19:48448178	1
ARMC10	chr7:102715327	1
DHX9	chr1:182808438	1
KIAA1324L	chr7:86669550	1
NOL12	chr22:38082343	1
MZF1-AS1	chr19:59070552	1
OTX2	chr14:57277194	1
MTMR9LP	chr1:32707311	1
MIR142	chr17:56408679	1
PAMR1	chr11:35547579	1
IFI35	chr17:41158741	1
ABCA7	chr19:1040101	1
FAM107A	chr3:58572840	1
LOC440300	chr15:84860599	1
IFT20	chr17:26662515	1
TEN1-CDK3	chr17:73975297	1
GPR119	chrX:129519511	1
GDF2	chr10:48416872	1
LOC285000	chr2:106227016	1
ANTXR1	chr2:69240275	1
LOC284379	chr19:54106751	1
C8ORF34-AS1	chr8:69243726	1
GFPT1	chr2:69614386	1
HCG22	chr6:31021226	1
NPLOC4	chr17:79604179	1
MINA	chr3:97691295	1
LOC101928370	chr1:101702084	1
SRA1	chr5:139937041	1
RAP2C	chrX:131352189	1
SNORD42A	chr17:27050446	1
CADM2	chr3:85554208	1
TBC1D22B	chr6:37225479	1
C11ORF45	chr11:128775592	1
GIP	chr17:47045955	1
USPL1	chr13:31191829	1
SCGB1D4	chr11:62066536	1
TMSB4Y	chrY:15815446	1
COL14A1	chr8:121137346	1
DRD5P2	chr1:148901844	1
MOB1A	chr2:74405995	1
LOC100505942	chr16:67562648	1
ZNF337	chr20:25667575	1
MIR4449	chr4:53578848	1
C1ORF177	chr1:55271735	1
MIR3670-2	chr16:16400226	1
TP53TG3B	chr16:33262117	1
RPS11		0
ELMO2		0
CREB3L1		0
PNMA1		0
MMP2		0
TMEM216		0
TRAF3IP2-AS1		0
LRRC37A5P		0
LOC653712		0
LOC101929315		0
ZHX3		0
ERCC5		0
RXFP3		0
CTAGE10P		0
APBB2		0
KLHL13		0
C6ORF226		0
KRTAP10-8		0
C11ORF70		0
NAPRT		0
PDCL3		0
AEN		0
FRG2		0
DECR1		0
SALL1		0
GGT3P		0
CADM4		0
MIR6500		0
RPS18		0
SLC10A7		0
CFHR5		0
OR2K2		0
BRIX1		0
PXYLP1		0
MIR378F		0
LMAN1		0
CHD8		0
SUMO1		0
MIR941-2		0
GP1BA		0
MIR1233-2		0
BSN-AS2		0
BOLA3-AS1		0
LOC101928894		0
UQCR11		0
DDB1		0
LINC01279		0
LINC00864		0
MYO9B		0
MMP7		0
MIR1976		0
CRNKL1		0
MIR618		0
XAB2		0
NIFK-AS1		0
RTN1		0
KLHL14		0
ADAM21P1		0
TBX10		0
ZBTB12		0
UTY		0
MIR515-2		0
CENPQ		0
ZAR1L		0
DTNBP1		0
LINC00683		0
MIR3156-3		0
KBTBD8		0
ZEB1		0
ZG16		0
PRKAG2-AS1		0
FAT4		0
LOC728040		0
MIER1		0
SALRNA1		0
CHD9		0
STK16		0
ARID3C		0
TOB2		0
LOC101927769		0
MIR1246		0
INIP		0
BANK1		0
OR2V2		0
MIR489		0
SFTA2		0
GRM2		0
PROSC		0
MIR4511		0
SPIN2B		0
PIR		0
IPO9		0
FLJ26850		0
TTTY1B		0
EVC		0
CXCL13		0
EHHADH-AS1		0
SORL1		0
NAT10		0
CHD1		0
SYN3		0
LINC00210		0
SLC22A2		0
SERPINF1		0
WDR34		0
OR7A17		0
SUGCT		0
POTED		0
EPT1		0
C14ORF80		0
PCAT19		0
LOC101929717		0
LHB		0
TAOK3		0
STK25		0
OR10X1		0
TMC3-AS1		0
CDC25B		0
BMP3		0
TMEM180		0
MAP1LC3C		0
MIR564		0
CRYGC		0
POU3F1		0
LINC01247		0
HIGD1B		0
USP6NL		0
LINC00460		0
ABCD4		0
LOC102546298		0
TEK		0
SLC25A46		0
LARP7		0
LOC100996694		0
FAAHP1		0
CD160		0
NUTM2G		0
MT1JP		0
PHF20		0
CPNE4		0
HNF1A-AS1		0
GTPBP1		0
MIR6746		0
RAB33B		0
GLUD1P7		0
ALDOC		0
ZNF212		0
NUDT1		0
FAM170B-AS1		0
RFPL2		0
ZNF83		0
LOC401357		0
IPW		0
MIR630		0
GDPD5		0
PDCD4		0
CEP350		0
LINC01441		0
ARL14EPL		0
OR10A2		0
CST7		0
SELL		0
CIAO1		0
SNORD115-26		0
RNF223		0
OR8J3		0
LTBP4		0
DCAF4L1		0
OR6C1		0
CTD-2270F17.1		0
SIRT6		0
CCL19		0
MIR3121		0
PPIL1		0
LOC101927286		0
LOC101060019		0
GBP7		0
STK17A		0
OR9G1		0
LINC01387		0
ABR		0
PCDHA13		0
FOXE1		0
SIAH3		0
LINC01121		0
RIMBP3B		0
GML		0
CNGA3		0
CD38		0
ZDHHC6		0
NEFH		0
PGBD5		0
CTDSP2		0
ZNF257		0
RMND5B		0
CCNY		0
EXOSC7		0
ROR2		0
LINC01212		0
MAOA		0
TNNT3		0
MIR924		0
GYPC		0
MIR3120		0
LINC01163		0
AP4B1-AS1		0
RNF4		0
EMC1		0
F8A1		0
HDAC7		0
PLEKHG4		0
GRB2		0
LINC00597		0
HIST1H2AD		0
DUS3L		0
EIF1		0
LOC101928567		0
FPGT		0
CHST15		0
C15ORF62		0
NLGN1-AS1		0
MIR4442		0
RASA4B		0
GPN2		0
GDF10		0
COQ9		0
LOC101927178		0
MIR101-2		0
LOC102467222		0
DKFZP434I0714		0
GCC2		0
RARRES3		0
PLXNA1		0
KIAA0100		0
PMF1		0
FNDC1		0
HS2ST1		0
CRELD2		0
CD82		0
C8G		0
DOCK9-AS1		0
SPINK14		0
PIRT		0
LOC101927139		0
LIM2		0
MIR193A		0
MMP16		0
MIMT1		0
LOC100133091		0
LOC101928416		0
DRD3		0
PTP4A2		0
OR4M2		0
OGFR-AS1		0
HPCA		0
SEC14L1		0
METTL25		0
NME8		0
EMILIN1		0
CHFR		0
NDUFS4		0
COL18A1		0
PDZD3		0
PRAMEF7		0
MIR7705		0
MIR591		0
FAXC		0
SF3B6		0
ERBB2IP		0
FUS		0
EMX2		0
TF		0
CLCN4		0
NPR1		0
ELAC2		0
CELA1		0
LOC101929526		0
USP42		0
RALY-AS1		0
EMC8		0
SEC23IP		0
POLR2J		0
C10ORF131		0
UQCRC1		0
LOC729603		0
ERVV-2		0
POLG		0
ADAM23		0
MIR4641		0
TFR2		0
RICTOR		0
RUNDC3A-AS1		0
GRXCR2		0
SNORD105		0
C9ORF66		0
IDO2		0
HLA-J		0
SNAPC1		0
GNA11		0
FSIP1		0
CELA3A		0
UPF3A		0
IGSF11		0
LAGE3		0
CHST6		0
LOC101929464		0
USP46-AS1		0
UNC13B		0
MIR550B1		0
TTLL4		0
ZNF687		0
DNAH17-AS1		0
SDC2		0
METTL21A		0
COX7A2		0
CETN4P		0
MIR4483		0
LINC01298		0
LAMB4		0
LOC283352		0
LOC101927765		0
FAM24A		0
PDP1		0
MIR8083		0
LRRTM3		0
GPHB5		0
AHCYL2		0
OR4C13		0
IZUMO2		0
TRIM64C		0
HABP4		0
TMEM125		0
MIR548AU		0
CNTN2		0
MIR885		0
ASNSD1		0
FUT4		0
BAGE4		0
LINC00675		0
C8ORF44		0
HGH1		0
RP9		0
ARAP1		0
CDH8		0
AGPS		0
TARID		0
PP14571		0
CLEC4GP1		0
LOC400541		0
LINC01444		0
LINC00305		0
UNG		0
LOC101929412		0
LOC284344		0
GSTP1		0
DCUN1D5		0
C16ORF72		0
SLC9A3R1		0
PACERR		0
NAMA		0
FAM218A		0
LILRA6		0
CHMP7		0
C19ORF73		0
REM2		0
MIR637		0
DNHD1		0
MIR122		0
FKBP4		0
ZNF350		0
LOC101929710		0
BST1		0
KISS1R		0
NCR2		0
MIR3690		0
DEFB125		0
UBE2W		0
OR2T29		0
SNORA78		0
KRT15		0
SCN11A		0
GFI1		0
LOC105274304		0
GPR1-AS		0
FHL1		0
OSGEP		0
GATA1		0
TTTY14		0
LPIN3		0
RPL4		0
RBPMS		0
PRPF3		0
C4ORF46		0
SPATA19		0
XCR1		0
IRX3		0
ELFN1		0
RBM6		0
MIR4698		0
CYSTM1		0
TTC41P		0
KLF4		0
IFITM10		0
MIR5010		0
UNC5CL		0
SEBOX		0
BTK		0
KRCC1		0
SYTL5		0
PRND		0
PIGL		0
MOB1B		0
HUS1		0
DNAJC30		0
UIMC1		0
FXYD2		0
ZNF667		0
PTGES3L-AARSD1		0
ZCCHC12		0
TFEC		0
ATP7B		0
POLD2		0
ABCC6P1		0
MIR3180-3		0
ACOT2		0
HIST1H4I		0
ECRP		0
PPARGC1A		0
C1ORF110		0
ETFA		0
C16ORF90		0
ZNF146		0
POLRMT		0
MIA2		0
WI2-2373I1.2		0
KLHL6		0
LOC440311		0
ZNF487		0
NENF		0
HOXB5		0
ARGFX		0
PRSS22		0
CASC4		0
GTSF1		0
C10ORF67		0
CUL4B		0
CENPJ		0
PITX1		0
AKIRIN1		0
LOC105616981		0
MIR452		0
CELSR3		0
LOC100132735		0
LCN15		0
DNAJC9		0
ZNF568		0
ITSN1		0
EHBP1L1		0
MT1DP		0
DCTN1		0
LIN28B		0
TNKS2		0
TMEM241		0
C1QBP		0
CADPS2		0
C5ORF67		0
SRMS		0
MIR4666B		0
GJA9		0
TRIM45		0
OSER1		0
LOC392232		0
TCP1		0
TMED7		0
CMA1		0
CENPL		0
PTCRA		0
MIR2054		0
FST		0
VWCE		0
PAWR		0
TBC1D3B		0
SNORD91A		0
ABCC12		0
SYCE3		0
LDLR		0
CXCR2P1		0
ASTN2		0
LINC00577		0
C20ORF195		0
PCDH9-AS4		0
TAB2		0
GPATCH8		0
T1560		0
TANC2		0
KIF4A		0
FAM161A		0
PGM1		0
SNORA11C		0
CPD		0
SNORD116-7		0
SNCAIP		0
DCT		0
ANXA8		0
HLA-DOA		0
OR11L1		0
UPK1B		0
PROSER3		0
DNAJB4		0
UGT1A8		0
HIST1H4L		0
GOLGA8EP		0
PECR		0
WFIKKN1		0
MIR16-2		0
HSPA2		0
SERP1		0
SYDE2		0
CNTNAP3B		0
LOC101928093		0
TACR2		0
SVOPL		0
NUP85		0
LOC101928978		0
SNORA18		0
CD177		0
EDDM3B		0
PIGG		0
LGR5		0
MIR3671		0
LINC00348		0
LOC574538		0
SCARNA2		0
RAB5A		0
LRRC16B		0
FLJ13224		0
DCAF11		0
USP9Y		0
LBX1-AS1		0
SUSD6		0
PLEKHM3		0
LRP1B		0
XAF1		0
TMEM244		0
MIR4727		0
ENKUR		0
ANKDD1A		0
ABCG8		0
MIR4444-1		0
DAND5		0
CASC10		0
SPAG6		0
ZBED6CL		0
ZDHHC22		0
CCDC60		0
THOC7		0
TCTA		0
OR8K3		0
MIR4660		0
GGTLC2		0
B2M		0
LPPR4		0
SQLE		0
MIR891B		0
LOC100129046		0
SEPHS1		0
GLIPR2		0
PLRG1		0
SPG7		0
ZNF614		0
ZMYM6NB		0
PARD6G		0
FAM41C		0
MIR221		0
INPP5B		0
GRPEL2		0
PPID		0
TRIM56		0
UBE2J1		0
MIR3150A		0
IL20RA		0
MIR4439		0
LINC01291		0
LINC01206		0
SNORA75		0
ERMARD		0
UTS2R		0
SAFB2		0
LOC100506271		0
DNAJC25		0
MIR5571		0
MIR4783		0
LOC101927987		0
BGLT3		0
KLRG1		0
NEURL3		0
MIR4776-2		0
HCG2040054		0
E2F4		0
CLEC4M		0
MIR4537		0
LINC01185		0
TAC1		0
SNORD115-14		0
GYPA		0
MIR4726		0
TRAIP		0
KIAA0232		0
SEMA3B-AS1		0
ERCC8		0
GPX4		0
KIAA0368		0
MSS51		0
LINCMD1		0
GPR157		0
OR52A1		0
FAM199X		0
CTAGE4		0
LOC101928790		0
ALG9		0
BTBD10		0
SDK2		0
BAIAP3		0
RABGGTB		0
ANKRD40		0
LOC100289673		0
KRT74		0
CALCOCO2		0
LOC100128993		0
SNCA		0
SPATS2L		0
PABPC5-AS1		0
LPP-AS1		0
ESRRB		0
SLC48A1		0
ARHGAP26		0
TDRD9		0
PRCD		0
CDK16		0
KLRC4		0
HRAS		0
JAGN1		0
BSDC1		0
RNF43		0
NDUFAF1		0
PHF12		0
HOTAIRM1		0
KRTAP4-8		0
LOC100507175		0
OR1L3		0
FOLR2		0
PLAC8L1		0
LYZL6		0
LEMD1-AS1		0
MIR3611		0
WSB1		0
PROS1		0
OSTN		0
SOCS4		0
SDR39U1		0
DDIT4L		0
MAS1		0
LOC285043		0
LINC00896		0
TBCCD1		0
MGC34796		0
CSHL1		0
MIR548A1		0
SCARNA16		0
ZBTB7C		0
AP2S1		0
C4ORF27		0
VAT1		0
SHANK3		0
TUFM		0
OR7E5P		0
THEG		0
LINC01264		0
KRT34		0
SGSM3		0
TOMM22		0
SOCS3		0
CPO		0
POP4		0
MALL		0
PARK2		0
OR1B1		0
TMEM132A		0
RNU5D-1		0
LCE1E		0
DACT3-AS1		0
RUVBL2		0
CGRRF1		0
PIANP		0
WNT10B		0
BAIAP2L2		0
SNORD51		0
ISCA1		0
RPAP1		0
NXPE2		0
RPL27		0
NLRP9		0
EPN1		0
LOC649133		0
SLC35A1		0
C1ORF123		0
GAL		0
SLC14A2		0
LINC00997		0
RDH11		0
SERF2-C15ORF63		0
LSMEM2		0
AUH		0
MBD2		0
ABHD14B		0
SPHAR		0
ALAS1		0
FOXO1		0
LOC100996437		0
SNORD114-23		0
PPP1R17		0
CRLF3		0
OR5W2		0
FARS2		0
LOC285593		0
CCDC28A		0
OR13F1		0
NPHP3		0
LOC285627		0
PYURF		0
C16ORF95		0
TSEN54		0
MAGI2-AS3		0
CFAP20		0
OR8B4		0
NEURL1-AS1		0
DEFB106B		0
STH		0
ZC3H14		0
HMGXB4		0
CBX2		0
TFAP2A-AS1		0
CXADRP2		0
RBMXL1		0
CRTAP		0
DDX50		0
TBPL2		0
STYXL1		0
BLVRB		0
A1BG-AS1		0
SNORA68		0
CCZ1B		0
LOC101928590		0
MMP24		0
GRID1		0
MIR1251		0
BANF1		0
CATSPER2P1		0
MIR513B		0
FAM13A		0
SLC25A24		0
LINC00161		0
SLC25A15		0
MRO		0
MIR7156		0
MIR152		0
CCDC129		0
ACER3		0
LOC100500773		0
FAM84B		0
DAB1-AS1		0
TDP1		0
URAD		0
RFK		0
ARHGAP8		0
ZFYVE9		0
C20ORF96		0
WIBG		0
GBA2		0
C6ORF99		0
NDUFB3		0
LINC00588		0
HSD17B13		0
KRTAP5-11		0
MIR3145		0
GRIN3A		0
FLJ34503		0
FMNL1		0
FLJ41200		0
CHTOP		0
GNLY		0
FAM223A		0
GRAMD1C		0
ZNF165		0
USP38		0
FAM83A		0
ARMCX3		0
ARHGDIB		0
ACSM6		0
MIR6752		0
SMG1P5		0
AK1		0
ACSS3		0
KIAA1045		0
C4B		0
DNAJB13		0
MUC22		0
NEU2		0
TRIM77		0
HIST1H4B		0
FAM20B		0
HES2		0
FAM73B		0
SNORD72		0
CYP4F24P		0
NEDD8-MDP1		0
INTS7		0
AMPH		0
ZNF775		0
SNORD61		0
USP17L7		0
UCKL1		0
SNORA23		0
MIR548S		0
HNRNPH1		0
ALDH1L1		0
COX16		0
CFAP47		0
SLC23A1		0
THAP4		0
RBM4B		0
OGFRL1		0
KRTAP10-5		0
PPP1R15A		0
LINC01554		0
LOC101929551		0
BMF		0
MAN1A1		0
RBMY1A1		0
TGIF2LY		0
NKAIN1		0
SNORD109A		0
NLGN4X		0
LOC399715		0
IFNE		0
ALOX12		0
RB1CC1		0
NEIL2		0
TMEM255B		0
EIF4E		0
SIGLEC15		0
ABHD5		0
EXOC4		0
LINC01162		0
LOC102724691		0
PRAMEF14		0
HEATR5A		0
SLC29A4		0
BATF2		0
HTR4		0
GUSBP5		0
URGCP		0
LOC101060385		0
EMB		0
TRAF6		0
LPAR3		0
LMNB1		0
CKMT1B		0
SNORD9		0
LINC00320		0
C11ORF85		0
FAM19A5		0
SHE		0
LINC01046		0
IFIT1B		0
LOC101927709		0
LINC01587		0
CACNA1C-AS4		0
PIK3C2B		0
RBM12B-AS1		0
AKR1E2		0
LOC101927914		0
USP15		0
MIR548Z		0
MIR6854		0
TCEAL2		0
PTGER2		0
LOC101927410		0
FAM184B		0
SLC31A1		0
LOC101929532		0
CASC21		0
LINC01393		0
IFT172		0
ST7L		0
GFOD1		0
ADAM29		0
PKN3		0
NCOR1P1		0
CNTD1		0
COMMD1		0
OCM2		0
NTRK2		0
LOC100996349		0
FOXN3		0
MFGE8		0
PFKFB2		0
TAS2R4		0
MIR1245A		0
ENTHD1		0
MIR765		0
PRMT5		0
OR5K4		0
PPEF1-AS1		0
ZSCAN12P1		0
HIST2H3A		0
DCAF4		0
LOC100996255		0
LCLAT1		0
C2ORF72		0
TSKU		0
PDLIM1		0
KRTCAP3		0
KCNS2		0
RNF126		0
MIR4741		0
LIFR-AS1		0
CEP63		0
CLIC4		0
C8ORF76		0
C1ORF216		0
KLK7		0
ALOX5AP		0
RIPK3		0
TAS2R9		0
BIRC6		0
ZNF16		0
RFT1		0
ELP6		0
APOC1P1		0
SLC8A2		0
TACC1		0
ITGAD		0
SH3PXD2B		0
SAMHD1		0
EPC2		0
ATP13A2		0
ASIC5		0
KRT4		0
SNX18		0
MDM2		0
CAPNS1		0
SNORD110		0
PCDH20		0
KCNK9		0
SNHG15		0
MIR544A		0
MIR4464		0
OR2C1		0
KLHDC3		0
IPPK		0
EFHD2		0
NBEA		0
GALR3		0
ABCA6		0
CLDN3		0
AKT2		0
EGFR		0
ZDHHC3		0
MIR6761		0
SLC25A4		0
CYB5B		0
TESPA1		0
LOC105377348		0
NDRG1		0
CPXM1		0
CACNA1C-AS1		0
CDHR4		0
OR5L2		0
ANKRD30BP2		0
ZNF285		0
MRPL46		0
FMO6P		0
FARP2		0
SNORD50A		0
LOC100270746		0
MAPKAPK3		0
LDHAL6B		0
NCAM2		0
PRKD2		0
PKNOX2-AS1		0
ZFP36L1		0
CYSLTR1		0
DRICH1		0
OR4C3		0
CFAP54		0
HIST1H2AJ		0
CCNB2		0
ZNF10		0
TMEM175		0
FAM134A		0
TIGD4		0
PCNP		0
SLX1B-SULT1A4		0
LOC101927087		0
HOXB-AS1		0
CREB1		0
C17ORF47		0
NAA38		0
MIR4682		0
LL22NC03-63E9.3		0
FAM225A		0
TMPRSS3		0
LINC01501		0
LAT		0
LOC392196		0
KCNA3		0
SKIV2L2		0
ROPN1B		0
ZHX2		0
FKSG29		0
CDT1		0
CFAP53		0
LINC01102		0
CD28		0
ZNF624		0
2002-09-01		0
MIR4299		0
SOHLH2		0
MCOLN3		0
MASP2		0
LINC00992		0
ZNRF3		0
GPATCH3		0
AGL		0
QRICH2		0
PSD4		0
CCNB1IP1		0
YWHAEP7		0
ENPP7		0
OBFC1		0
KCNG3		0
ENPEP		0
LOC101927358		0
MIR93		0
SCT		0
SKI		0
SHISA4		0
SEC61G		0
CAPN11		0
ATXN7L3		0
SNORA1		0
FAIM		0
DBNDD1		0
SZT2		0
ANKRD36		0
GABRP		0
AWAT2		0
TACSTD2		0
PPP2R2A		0
EIF3J		0
ZNF541		0
TEKT4		0
LINC01495		0
PVALB		0
RTCA		0
C2ORF78		0
MIR199B		0
MIR7160		0
F10		0
MIR4264		0
FAM134C		0
MIR3199-2		0
COMP		0
ZNF865		0
IQCF6		0
TMEM52B		0
SCLT1		0
TAL1		0
LOC493754		0
ACSL1		0
ABCC5		0
RBBP7		0
ABL1		0
PTPRG		0
NCOR1		0
TXNRD1		0
SPINK4		0
MIR4423		0
CMTR1		0
MIR3154		0
UBE2H		0
BRDT		0
LRRC26		0
FAM156A		0
LINC01094		0
SLC6A8		0
CCNE2		0
CALCR		0
CDC45		0
MIR6825		0
LINC00685		0
CWC22		0
PPP1CB		0
ABHD8		0
ARF5		0
SLC24A4		0
CCT3		0
ZNF121		0
SLC5A10		0
SLC3A2		0
OR13A1		0
RAD50		0
LOC102724190		0
MIR4767		0
IER5		0
SNORD113-6		0
MTHFD1L		0
MBTPS2		0
MVK		0
RBMY1E		0
FAM110D		0
NCL		0
PSMG3-AS1		0
PSMD10		0
MOBP		0
KRTAP5-3		0
HRH1		0
HCG18		0
SPANXA1		0
RASGRP3		0
NUDT16L1		0
PRKRIP1		0
FBXO47		0
MED21		0
SYT11		0
NTSR2		0
BTBD18		0
LINC01018		0
OR2A25		0
SPTBN2		0
LRMP		0
BHLHE40		0
KLHL31		0
TRIM52-AS1		0
RNF111		0
PTH		0
IST1		0
KIAA0895		0
C2ORF54		0
LOC102546229		0
P2RY10		0
NME5		0
DDX21		0
LRSAM1		0
CLDN34		0
HDAC11		0
VMO1		0
MIR1273H		0
MTO1		0
MIR5581		0
ADAR		0
P2RX1		0
HBM		0
EN2		0
MIR2276		0
MIR6846		0
TM9SF2		0
INHBE		0
DLG5-AS1		0
TCTE3		0
TOX2		0
PSG10P		0
HBB		0
MED15		0
CASR		0
MTPN		0
MT1HL1		0
UNC50		0
IRF2		0
PGR		0
SPATA6L		0
GPR84		0
SRPX		0
BRE		0
FGF10		0
SDC3		0
MIR3935		0
LOC101927543		0
BACH1-IT2		0
TMEM218		0
SOX6		0
RPUSD2		0
LOC100505635		0
ZSCAN31		0
MAPK11		0
TBC1D22A		0
ZNF204P		0
COL4A6		0
TOMM70A		0
MIR22		0
NAB1		0
ASIC4		0
ZNF793-AS1		0
TSPAN18		0
TRMT10A		0
ZNF559-ZNF177		0
MED31		0
ZNF532		0
PLG		0
LBHD1		0
CAPSL		0
MIR1261		0
MIR4430		0
ASB14		0
LOC101927237		0
CA8		0
LAMTOR4		0
IL36RN		0
FBLN7		0
SLFN11		0
POLR2J3		0
HDAC11-AS1		0
MIR4500		0
NOL7		0
LINC01532		0
BRMS1L		0
PANK2		0
ICAM3		0
LMO7DN		0
TAF8		0
MIR3173		0
MIR190A		0
LOC102724604		0
RNF139		0
ZNF594		0
ADAM8		0
SFTPC		0
MAN2B2		0
RGS12		0
EIF1AY		0
LRRIQ1		0
GPR150		0
LOC101926911		0
C1ORF185		0
PRRG3		0
SAA4		0
RPL23P8		0
RAPGEF5		0
CHP1		0
ZCCHC2		0
MIR570		0
MIR4536-2		0
DDX11-AS1		0
ACAP2		0
LOC101926898		0
PPP4R2		0
LINC01193		0
CDCA2		0
SLC9A7P1		0
PTGFRN		0
OR4D5		0
SIGLEC5		0
MIR548H5		0
GUCD1		0
OACYLP		0
MIR548B		0
CSNK1G2-AS1		0
LRRN4CL		0
NMUR2		0
KIAA1586		0
DAGLA		0
MGC27382		0
LOC101929123		0
SNHG22		0
NEUROD6		0
GPR32		0
CHCHD6		0
SLC2A4RG		0
LINC01192		0
FBXL3		0
CA5B		0
MPHOSPH9		0
KIZ		0
HCN4		0
CEACAM19		0
SH2D4B		0
MIR541		0
HFE2		0
LINC01317		0
TGM4		0
LOC102724663		0
TBC1D15		0
LYPD2		0
FAM168A		0
ZNF830		0
MRPS21		0
NONO		0
CLEC5A		0
ITCH		0
MGAT3		0
MBP		0
MIR605		0
GTF2H2C		0
RPP25		0
SOSTDC1		0
KCNAB1-AS2		0
HRC		0
TRIM48		0
TMEM133		0
MIR6770-1		0
ECEL1P2		0
LRRC74A		0
LOC101928443		0
HOXC11		0
DOK5		0
HELZ		0
ADRB3		0
PTRH2		0
MPEG1		0
DMD		0
NDUFA12		0
KRTAP2-4		0
TMCO5B		0
MIR4793		0
STAMBPL1		0
ADCY2		0
SEC24B-AS1		0
KLHL20		0
SRM		0
OTC		0
MIR1184-2		0
MIR199A1		0
LOC100506700		0
ANKRD33B		0
MPC1L		0
LOC101927973		0
TMIE		0
SNX8		0
LIPK		0
LOC100128593		0
CHURC1		0
ANKRD20A4		0
KLC2		0
HDAC1		0
ELMOD3		0
LOC100507537		0
MIR3118-3		0
FNDC3B		0
MTCP1		0
VMA21		0
SNORD96B		0
WFDC10B		0
JAKMIP3		0
LOC101929541		0
PCDHGB3		0
SUZ12P1		0
CAV2		0
ATRNL1		0
C9ORF24		0
AREL1		0
SUN3		0
MIR4508		0
MIR4701		0
MED26		0
DUS1L		0
NEK9		0
KDM2B		0
CHRM3		0
WARS2		0
USP50		0
NEURL1B		0
RIMKLA		0
TBX22		0
ASF1A		0
TOMM40		0
MIR1302-1		0
MBNL1-AS1		0
TUBGCP5		0
IGSF6		0
TPPP		0
SNORD115-29		0
GSTM5		0
BTD		0
SNRPB2		0
PDCD1LG2		0
MBOAT7		0
MIR196A2		0
ERICH1		0
LINC00244		0
APOA4		0
KRTAP19-8		0
LOC392452		0
HOXA11		0
SLC25A51		0
RAB28		0
MKX		0
HAUS7		0
OR2M3		0
PKP3		0
SH3GL2		0
RPN2		0
CTSO		0
SFMBT1		0
MIR6081		0
C1ORF159		0
MIR5091		0
HSF5		0
TTC9B		0
SPATA17-AS1		0
UPF2		0
SORBS3		0
CD101		0
C4BPA		0
ALB		0
JPH1		0
DOPEY1		0
C1ORF141		0
AGBL2		0
TERF1		0
KIF22		0
VIPR1-AS1		0
GSE1		0
ACTBL2		0
NINJ1		0
SNORD32A		0
SEC61A2		0
ZNF703		0
UCP3		0
SFXN4		0
HIST1H1D		0
MYL6B		0
TREM1		0
SNORD116-8		0
OST4		0
LOC283922		0
VAMP7		0
OR52E6		0
BREA2		0
LOC101929395		0
CKMT2		0
SLC13A3		0
HLA-C		0
BBIP1		0
SBDSP1		0
N4BP2L1		0
C10ORF90		0
TIMP4		0
SLIT2		0
HAUS3		0
RSF1		0
MYLK3		0
MON1A		0
LONRF1		0
DLGAP1-AS3		0
CCP110		0
CACNG6		0
CEP128		0
LRIT3		0
HMGXB3		0
ZSWIM3		0
DPPA4		0
ZNF804A		0
MDS2		0
CCIN		0
WDR83		0
MIR665		0
SLC25A31		0
KCNMB4		0
DENND6B		0
CGB8		0
STX6		0
LINC01281		0
HIST1H1C		0
KRTAP9-9		0
CIDEB		0
PDK3		0
KCNJ11		0
CASP4		0
MIR6786		0
TPR		0
ZSCAN20		0
MTX2		0
C1ORF210		0
LOC102723448		0
HIST1H2BH		0
LYRM7		0
BRD3		0
HIST1H2BO		0
OR2T6		0
LINC01354		0
SLC45A1		0
SERPINA3		0
MAGEB10		0
MIR3912		0
FBXO39		0
KCNJ16		0
THUMPD3-AS1		0
PABPC1L2B		0
KRT79		0
FABP2		0
LOC100507389		0
ZNF57		0
FBXL4		0
CLEC9A		0
UGT8		0
LOC101929516		0
BMP2K		0
SLC25A23		0
RAPGEF4-AS1		0
MAPK4		0
RNASEH2B-AS1		0
MIR4275		0
HINT1		0
SFXN5		0
KRTAP13-1		0
CHCHD2		0
FAM3D		0
NDP		0
SLC4A4		0
RHOBTB1		0
RPL38		0
[truncated: 24,284 more rows]
