# Supplementary material for: Modulation of macrophage inflammatory function through selective inhibition of the epigenetic reader protein SP140
Source: BMC Biol. 2022 Aug 19;20:182. doi: 10.1186/s12915-022-01380-6 (PMC9392322; doi:10.1186/s12915-022-01380-6)
Supplement: Supplementary file 12 — Additional file 12: Table S12. The normalized read count for ChIP-seq (GSK761-pretreated “M1” macrophages stimulated with 1h LPS (100 ng/mL)). [file 12915_2022_1380_MOESM12_ESM.xlsx]

## Sheet: Sheet1
#H:hugo	tss_for_gene	The normalized read count
MIR3687-2	chr21:9826202	217.333
MIR3687-1	chr21:9826202	217.333
MIR3648-2	chr21:9825831	73.6667
MIR3648-1	chr21:9825831	73.6667
MIR663A	chr20:26188914	47.6667
FLOT1	chr6:30710453	42
MIR6087	chrX:108297771	39
MIR8078	chr18:112339	31
ROCK1P1	chr18:109064	30.6667
MIR7641-2	chr1:228759493	14
DUSP5P1	chr1:228780656	13.6667
FLJ36000	chr17:21904061	12.6667
PF4	chr4:74847841	11
RHOU	chr1:228780393	11
REXO1L2P	chr8:86727072	11
LINC00910	chr17:41466266	10.3333
MIR4530	chr19:39900318	10
TNFAIP2	chr14:103592663	10
NFKBIA	chr14:35873960	8.33333
LOC100130476	chr6:138189370	7.66667
VIM-AS1	chr10:17271984	7.33333
USP17L20	chr4:9217130	7.33333
USP17L11	chr4:9217130	7.33333
TRAF1	chr9:123676850	7.33333
USP17L18	chr4:9217130	7.33333
SCO2	chr22:50964574	7
ARHGEF2	chr1:155947966	7
BZRAP1	chr17:56406152	6.66667
USP17L29	chr4:9350618	6
USP17L28	chr4:9350618	6
USP17L30	chr4:9350618	6
CAPZB	chr1:19811201	6
USP17L26	chr4:9350618	6
USP17L27	chr4:9350618	6
USP17L5	chr4:9350618	6
USP17L25	chr4:9350618	6
LINC01410	chr9:66457288	6
USP17L24	chr4:9350618	6
MIR4477A	chr9:68415388	5.66667
CITED2	chr6:139695350	5.66667
ICAM4	chr19:10397642	5.66667
BZRAP1-AS1	chr17:56406298	5.66667
CXCL1	chr4:74735108	5.33333
TNF	chr6:31543343	5.33333
FANK1	chr10:127585107	5.33333
CEBPB-AS1	chr20:48808606	5.33333
MIR6891	chr6:31323093	5
SGPP2	chr2:223289321	5
LOC101928626	chr1:564389	5
SNAR-A10	chr19:50621097	4.66667
SNAR-A7	chr19:50621097	4.66667
TCEB3CL	chr18:44556213	4.66667
SNAR-A3	chr19:50621097	4.66667
SNX16	chr8:82754521	4.66667
SNAR-A4	chr19:50621097	4.66667
CDK9	chr9:130548304	4.66667
LINC01003	chr7:152161208	4.66667
SNAR-A5	chr19:50621097	4.66667
TYMP	chr22:50968514	4.66667
SNAR-A14	chr19:50621097	4.66667
DOCK4	chr7:111846462	4.66667
SNAR-A8	chr19:50621097	4.66667
SNAR-A6	chr19:50621097	4.66667
PDE4DIP	chr1:145039995	4.66667
SNAR-A11	chr19:50621097	4.66667
CREM	chr10:35416384	4.66667
SNAR-A9	chr19:50621097	4.66667
SH3KBP1	chrX:19905744	4.66667
IAH1	chr2:9614669	4.66667
BHLHE40	chr3:5021096	4.33333
SNAR-B2	chr19:50637121	4.33333
DMXL2	chr15:51914967	4.33333
RGL2	chr6:33267165	4.33333
SNAR-B1	chr19:50637121	4.33333
SNAR-A12	chr19:48448178	4.33333
AGTRAP	chr1:11796141	4.33333
SNAR-A13	chr19:48448178	4.33333
TCEB3CL2	chr18:44544607	4.33333
ADPGK	chr15:73076126	4.33333
PGAM1	chr10:99186026	4
CCL4L1	chr17:34538309	4
MIR1227	chr19:2234148	4
LITAF	chr16:11680229	4
TEN1	chr17:73975297	4
SHF	chr15:45480165	4
NR1D2	chr3:23987611	4
SKIL	chr3:170075472	4
MIR6774	chr16:85951952	4
TEN1-CDK3	chr17:73975297	4
TRAF3IP2-AS1	chr6:111804674	3.66667
PHF19	chr9:123657174	3.66667
TNFRSF1B	chr1:12227059	3.66667
AKT1S1	chr19:50379506	3.66667
MGLL	chr3:127541725	3.66667
LOC146880	chr17:62777622	3.66667
FAM43B	chr1:20878931	3.66667
TCEB3C	chr18:44556449	3.66667
ZFX-AS1	chrX:24167771	3.66667
TRPC6	chr11:101454659	3.66667
AFF1	chr4:87928152	3.66667
CCL3L3	chr17:34524147	3.66667
PLEC	chr8:145028088	3.66667
BAG5	chr14:104029151	3.66667
LOC645166	chr1:148928312	3.66667
USP17L15	chr4:9236110	3.66667
CTAGE15	chr7:143268893	3.66667
C19ORF24	chr19:1275519	3.66667
USP17L22	chr4:9269344	3.33333
TTC21B	chr2:166810348	3.33333
FRG1	chr4:190861973	3.33333
ATP5A1	chr18:43678319	3.33333
FAM27B	chr9:67794189	3.33333
LOC100133985	chr2:70352448	3.33333
DDAH2	chr6:31698042	3.33333
KLF10	chr8:103666192	3.33333
SBNO2	chr19:1132273	3.33333
TSPY26P	chr20:30778163	3.33333
CFLAR-AS1	chr2:202022515	3.33333
SRGAP2-AS1	chr1:121139765	3.33333
NOTCH2NL	chr1:145209112	3.33333
PDZK1P1	chr1:145945477	3.33333
NAMPT	chr7:105925638	3.33333
ME1	chr6:84140938	3.33333
TPSAB1	chr16:1290677	3.33333
SNAR-C3	chr19:48453552	3.33333
ZNF10	chr12:133707213	3
ACSL1	chr4:185729755	3
MBNL1-AS1	chr3:151987415	3
MIR6859-4	chr1:17436	3
MRPL40	chr22:19420035	3
NPC1	chr18:21166581	3
PIK3AP1	chr10:98480279	3
SNAR-A1	chr19:48421685	3
PTGS2	chr1:186649559	3
ZNF790	chr19:37328929	3
BROX	chr1:222886662	3
GNA13	chr17:63052920	3
NME4	chr16:447741	3
PCP2	chr19:7697898	3
OCLM	chr1:186369703	3
GTF2A1	chr14:81687296	3
NR3C1	chr5:142783254	3
RNVU1-19	chr1:147994145	3
MIR4523	chr17:27717679	3
ZNF623	chr8:144718331	3
MIR6859-3	chr1:17436	3
NFE2L2	chr2:178128617	3
GCH1	chr14:55369542	3
IL15RA	chr10:6020150	3
ATG3	chr3:112280810	3
ATXN2L	chr16:28834368	3
FTL	chr19:49468565	3
RAP2C-AS1	chrX:131352534	3
KIF2A	chr5:61601988	3
C5ORF15	chr5:133304406	3
IER3	chr6:30712327	3
COPS6	chr7:99686582	3
MIR3142	chr5:159901408	3
FCGR1A	chr1:149754249	3
MCMBP	chr10:121632395	3
HIF1A-AS1	chr14:62162541	3
DCHS2	chr4:155412877	3
PAN3-AS1	chr13:28713311	3
LINC01465	chr12:62997214	3
ACTR6	chr12:100593864	3
MIR6723	chr1:567793	3
SNAR-A2	chr19:48421685	3
EXOSC6	chr16:70285833	3
VRK2	chr2:58273846	3
JAK2	chr9:4985244	3
BRICD5	chr16:2261069	3
MIR6859-2	chr1:17436	3
MIR4485	chr11:10529873	3
MADD	chr11:47291670	3
ITGB1	chr10:33247293	3
PARP8	chr5:49962771	3
SRC	chr20:35974530	3
CCL5	chr17:34207377	3
USP17L10	chr4:9212382	3
ZC3HAV1	chr7:138794465	3
PFKFB3	chr10:6186842	3
DCTN6	chr8:30013812	3
RNF13	chr3:149530474	3
CFAP221	chr2:120302007	3
TDRD3	chr13:60970590	3
JAZF1-AS1	chr7:28220075	3
HNRNPL	chr19:39340617	3
PATL1	chr11:59436511	3
HS3ST3B1	chr17:14204366	3
ELMSAN1	chr14:74227001	3
MIR6859-1	chr1:17436	3
HPCA	chr1:33352097	2.66667
RAB5A	chr3:19988571	2.66667
SOCS3	chr17:76356160	2.66667
TDP1	chr14:90422245	2.66667
PTGER2	chr14:52781015	2.66667
CLIC4	chr1:25071759	2.66667
ZNF559-ZNF177	chr19:9434901	2.66667
ECEL1P2	chr2:233251754	2.66667
DUSP2	chr2:96811179	2.66667
CDCA7	chr2:174219560	2.66667
SCML1	chrX:17755568	2.66667
CBLN3	chr14:24898731	2.66667
SETX	chr9:135230372	2.66667
UBE2J2	chr1:1209234	2.66667
ZFX	chrX:24167853	2.66667
LACTB	chr15:63413998	2.66667
AMZ2P1	chr17:62971703	2.66667
LINC01272	chr20:48884022	2.66667
AMDHD2	chr16:2570362	2.66667
HSP90B1	chr12:104324111	2.66667
LOC101929709	chr8:90769939	2.66667
IRF1	chr5:131826465	2.66667
LINC00925	chr15:89921272	2.66667
NEAT1	chr11:65190268	2.66667
ZNF580	chr19:56152391	2.66667
SFT2D1	chr6:166756094	2.66667
SIX5	chr19:46272497	2.66667
LOC100129518	chr6:160183364	2.66667
LBX2	chr2:74730443	2.66667
BZW1	chr2:201676268	2.66667
S100A11	chr1:152009511	2.66667
MIR8075	chr13:113917233	2.66667
TMEM45B	chr11:129685740	2.66667
GNMT	chr6:42928499	2.66667
CDK5	chr7:150755052	2.66667
PPCS	chr1:42922164	2.66667
LOC101060524	chr1:148901844	2.66667
MAFF	chr22:38597938	2.66667
NOS1	chr12:117799607	2.66667
CCRL2	chr3:46449048	2.66667
TPP1	chr11:6640692	2.66667
ARRDC2	chr19:18111940	2.66667
NDUFAF4	chr6:97345767	2.66667
FITM2	chr20:42939889	2.66667
RASSF4	chr10:45455218	2.66667
COPS3	chr17:17184012	2.66667
BRD2	chr6:32940860	2.66667
TIRAP	chr11:126152981	2.66667
UNC13D	chr17:73840798	2.66667
SLC37A4	chr11:118900278	2.66667
HOOK2	chr19:12886434	2.66667
ZNF559	chr19:9434901	2.66667
ZBTB40	chr1:22778343	2.66667
MIR142	chr17:56408679	2.66667
CD63	chr12:56122761	2.66667
XBP1	chr22:29196560	2.66667
PALM3	chr19:14169971	2.66667
SLC22A4	chr5:131630144	2.66667
FAM138D	chr12:67606	2.66667
SBF2	chr11:10315754	2.66667
DRD5P2	chr1:148901844	2.66667
C3ORF38	chr3:88198892	2.5
MIR6821	chr22:50356513	2.5
NUP210L	chr1:154127592	2.5
MIRLET7I	chr12:62997465	2.5
AAMP	chr2:219134932	2.5
RAB29	chr1:205744610	2.5
NR4A3	chr9:102584136	2.5
TNIP1	chr5:150460645	2.5
ADCY4	chr14:24804277	2.5
RPL23AP82	chr22:51222156	2.5
FAM27C	chr9:44990235	2.5
NFKBIZ	chr3:101568357	2.5
STARD8	chrX:67913481	2.5
MAFG	chr17:79881444	2.5
CGGBP1	chr3:88199016	2.5
DALRD3	chr3:49058504	2.5
PM20D1	chr1:205819276	2.5
PRRC2A	chr6:31588449	2.5
HES4	chr1:935552	2.5
TMEM216	chr11:61159864	2.33333
EMC1	chr1:19578053	2.33333
CTAGE4	chr7:143880547	2.33333
EFHD2	chr1:15736390	2.33333
FAM225A	chr9:115875175	2.33333
ZHX2	chr8:123793900	2.33333
LOC100289495	chr6:166756118	2.33333
CAPG	chr2:85637820	2.33333
ANKRD30BL	chr2:133015542	2.33333
PTMA	chr2:232573234	2.33333
RREB1	chr6:7108085	2.33333
RHBDF2	chr17:74483991	2.33333
HDGF	chr1:156721543	2.33333
RAB35	chr12:120554643	2.33333
FAM138C	chr9:35864	2.33333
GSTO1	chr10:106013951	2.33333
USP17L21	chr4:9221877	2.33333
ACADVL	chr17:7120443	2.33333
CCL3L1	chr17:34524157	2.33333
MIR7846	chr1:12226999	2.33333
RIPK2	chr8:90769974	2.33333
B4GALT1-AS1	chr9:33166945	2.33333
PPT2	chr6:32121228	2.33333
IDI1	chr10:1095061	2.33333
MALAT1	chr11:65265232	2.33333
RANBP1	chr22:20104946	2.33333
ANXA7	chr10:75173841	2.33333
CROCC	chr1:17248444	2.33333
GSTA4	chr6:52860178	2.33333
TJP2	chr9:71788970	2.33333
PARN	chr16:14724128	2.33333
MRTO4	chr1:19578074	2.33333
TPSB2	chr16:1280185	2.33333
ZMYM2	chr13:20532973	2.33333
FKBP6	chr7:72742234	2.33333
SERPINE2	chr2:224903357	2.33333
YME1L1	chr10:27443349	2.33333
MIR6732	chr1:37945830	2.33333
APOPT1	chr14:104029293	2.33333
GPR35	chr2:241544824	2.33333
CCDC122	chr13:44453826	2.33333
MIR1178	chr12:120151529	2.33333
TECPR2	chr14:102829299	2.33333
ATF4	chr22:39916568	2.33333
DUSP15	chr20:30458479	2.33333
TRIB2	chr2:12856997	2.33333
MCF2L-AS1	chr13:113622952	2.33333
DGKH	chr13:42614171	2.33333
ZFP36L2	chr2:43453745	2.33333
USP17L12	chr4:9221877	2.33333
BRD1	chr22:50218452	2.33333
LINC00383	chr13:69796477	2.33333
ACTB	chr7:5570232	2.33333
B9D1	chr17:19266046	2.33333
BMP6	chr6:7727010	2.33333
USP17L19	chr4:9255103	2.33333
LOC100419583	chr15:45021185	2.33333
GAN	chr16:81348570	2.33333
MIER1	chr1:67395925	2
NAT10	chr11:34127110	2
BAGE4	chr21:11098925	2
KLF4	chr9:110252047	2
PIGL	chr17:16120508	2
TBC1D3B	chr17:34808092	2
LOC284412	chr19:37759912	2
WNT10B	chr12:49365641	2
HMGXB4	chr22:35653444	2
ZNF775	chr7:150076405	2
ALOX12	chr17:6899383	2
WASH7P	chr1:29370	2
CEP63	chr3:134205046	2
AKT2	chr19:40791302	2
PRR20B	chr13:57734765	2
MED15	chr22:20861828	2
PANK2	chr20:3870462	2
KLHL20	chr1:173684079	2
GSTM5	chr1:110254863	2
ZNF703	chr8:37553268	2
THUMPD3-AS1	chr3:9439174	2
UGT8	chr4:115543522	2
MOB3C	chr1:47082563	2
OR5AU1	chr14:21624184	2
PLEKHB1	chr11:73358593	2
ZC3H3	chr8:144623620	2
TIPARP	chr3:156392204	2
TNFSF15	chr9:117554810	2
GAGE12J	chrX:49178508	2
CD58	chr1:117113715	2
GAGE12C	chrX:49306335	2
ARHGEF35	chr7:143892791	2
MIR548AN	chr13:100058554	2
CINP	chr14:102829253	2
MTMR9	chr8:11141999	2
UBE2S	chr19:55919325	2
SAPCD1-AS1	chr6:31733365	2
C14ORF183	chr14:50559361	2
NUTM2A-AS1	chr10:89102315	2
CNBP	chr3:128902810	2
HMGN4	chr6:26538571	2
BAGE	chr21:11098937	2
SLC35A5	chr3:112280856	2
POM121L9P	chr22:24647588	2
PDE4D	chr5:58652727	2
C7ORF13	chr7:156433348	2
LOC101927023	chr5:111563979	2
BLVRA	chr7:43798271	2
BNIP1	chr5:172571444	2
WNT11	chr11:75917574	2
KCNJ12	chr17:21279698	2
GATA3-AS1	chr10:8094454	2
ARPC4	chr3:9834231	2
FBXL7	chr5:15500304	2
PRKACA	chr19:14219202	2
KDSR	chr18:61034506	2
CT45A3	chrX:134883487	2
TSTA3	chr8:144699732	2
TUG1	chr22:31365196	2
TMEM18	chr2:677439	2
HENMT1	chr1:109203744	2
HIST1H2BC	chr6:26124132	2
IL17RE	chr3:9944511	2
CORO1B	chr11:67210983	2
DCST2	chr1:155006257	2
TBC1D3C	chr17:36348649	2
ACO1	chr9:32384600	2
CLCN7	chr16:1525085	2
CISTR	chr12:54150818	2
GAGE12E	chrX:49306335	2
TAF6L	chr11:62538774	2
ABI1	chr10:27150016	2
MIR6511A3	chr16:18437936	2
UPP1	chr7:48128199	2
LTA	chr6:31540070	2
HMGA1	chr6:34204649	2
FLRT1	chr11:63871361	2
MED14	chrX:40594804	2
CHMP6	chr17:78965640	2
HOXB8	chr17:46692301	2
RMDN3	chr15:41047534	2
PCDHA12	chr5:140254886	2
HOXC-AS3	chr12:54379303	2
WNT16	chr7:120969089	2
MSC-AS1	chr8:72755357	2
AMY1C	chr1:104198302	2
RAD23A	chr19:13056627	2
CXCL2	chr4:74964997	2
C20ORF24	chr20:35234136	2
LINC00869	chr1:149576160	2
ZNF263	chr16:3333486	2
MIR6511A1	chr16:18437936	2
LRRC27	chr10:134145740	2
MIR2861	chr9:130548196	2
NDUFS3	chr11:47600561	2
SMAP2	chr1:40840304	2
ZNF697	chr1:120190390	2
MXRA8	chr1:1298921	2
NFATC1	chr18:77160273	2
DCAF12	chr9:34126771	2
MIR4521	chr17:8090262	2
PRRG4	chr11:32851480	2
TIFAB	chr5:134788089	2
COX20	chr1:244998638	2
SPHK1	chr17:74381288	2
EBF1	chr5:158526788	2
HIST1H2AI	chr6:27775976	2
RGS5	chr1:163291581	2
TBL1X	chrX:9431334	2
GAGE12B	chrX:49296814	2
SMC1B	chr22:45809500	2
LOC440896	chr9:69181041	2
FBXO4	chr5:41925355	2
PNKD	chr2:219135114	2
NCF1C	chr7:74587802	2
TLN1	chr9:35732392	2
MIR6511A2	chr16:18437936	2
TAF5	chr10:105127723	2
POGZ	chr1:151431941	2
LOC100240728	chr7:56551012	2
LINC01498	chr12:108867466	2
FAM53A	chr4:1685718	2
BCL6	chr3:187463513	2
SMAP1	chr6:71377473	2
HAGLR	chr2:177053686	2
INPP5K	chr17:1420182	2
FAM126A	chr7:23053770	2
BLCAP	chr20:36156083	2
PMAIP1	chr18:57567191	2
IFNL4	chr19:39739496	2
ELMO3	chr16:67233027	2
LPIN1	chr2:11886721	2
PRPF40B	chr12:50017402	2
2011-03-01	chr5:16179897	2
CYBRD1	chr2:172378865	2
ADARB2	chr10:1779670	2
INSIG1	chr7:155089485	2
WASL	chr7:123389125	2
NDUFAF3	chr3:49058617	2
CCSAP	chr1:229478688	2
CLTC	chr17:57697049	2
PRAMEF11	chr1:12891264	2
KDM3B	chr5:137688284	2
LRRC47	chr1:3713068	2
SLC35A4	chr5:139944149	2
BAGE5	chr21:11098925	2
LINC00163	chr21:46414001	2
NPTX1	chr17:78450404	2
KLHL17	chr1:895966	2
UBE3C	chr7:156931654	2
GAGE12D	chrX:49306324	2
ZGPAT	chr20:62338793	2
CCDC9	chr19:47759730	2
AMY1B	chr1:104198324	2
NCDN	chr1:36023392	2
TMEM212-AS1	chr3:171618530	2
ARPC4-TTLL3	chr3:9834231	2
DOCK11	chrX:117629871	2
TANK	chr2:162016938	2
NCF1	chr7:74188308	2
ZFAS1	chr20:47894714	2
PTPN23	chr3:47422471	2
CD276	chr15:73976621	2
PAPD7	chr5:6714717	2
WDR74	chr11:62607628	2
SNX22	chr15:64443915	2
POLE	chr12:133264110	2
CCDC144NL-AS1	chr17:20771745	2
FAM230B	chr22:21521191	2
ACTR3	chr2:114648174	2
NID1	chr1:236228481	2
KLF6	chr10:3827473	2
DNAJC7	chr17:40169183	2
SMPD1	chr11:6411643	2
BAGE2	chr21:11098925	2
SNHG7	chr9:139622636	2
UROS	chr10:127511837	2
PABPC4L	chr4:135122903	2
MYH14	chr19:50706884	2
VPS37C	chr11:60928916	2
MIR636	chr17:74732630	2
SLC20A1	chr2:113403433	2
HSPH1	chr13:31736158	2
MIR3175	chr15:93447628	2
SMA4	chr5:69521622	2
MIR6511A4	chr16:18437936	2
SRSF5	chr14:70233833	2
C18ORF25	chr18:43753987	2
NUP62	chr19:50432773	2
ICAM5	chr19:10400654	2
BIRC3	chr11:102188180	2
TBL3	chr16:2022063	2
FRRS1	chr1:100231349	2
MFSD11	chr17:74732646	2
TPT1	chr13:45915419	2
SGK1	chr6:134496034	2
DSE	chr6:116692109	2
MST1P2	chr1:16972068	2
GAGE12G	chrX:49306335	2
LINC00965	chr8:7143880	2
GAGE12H	chrX:49306335	2
IL4I1	chr19:50400147	2
ROPN1L	chr5:10441973	2
DLEU2	chr13:50699677	2
PYROXD1	chr12:21590537	2
YAF2	chr12:42632089	2
SLC43A2	chr17:1532180	2
MAFB	chr20:39317880	2
LOX	chr5:121412918	2
SEMA6B	chr19:4559771	2
LOC102724094	chr7:100660889	2
PRR20C	chr13:57734765	2
PRRT4	chr7:128001739	2
PLXNC1	chr12:94542498	2
AP2M1	chr3:183892633	2
LOC100288778	chr12:73724	2
TBXAS1	chr7:139528951	2
CRYBG3	chr3:97540883	2
ARPC2	chr2:219082119	2
CCNO	chr5:54529545	2
PRR20D	chr13:57734765	2
TCAF2	chr7:143318541	2
RASL10A	chr22:29711745	2
LOC100289333	chr19:12305829	2
DDX23	chr12:49245957	2
YAP1	chr11:101981191	2
SNORD12	chr20:47897219	2
LOC101928273	chr2:138685502	2
SUCLA2	chr13:48575462	2
STX4	chr16:31044811	2
MMP23A	chr1:1631377	2
SHISA5	chr3:48514742	2
CD44	chr11:35160416	2
GEN1	chr2:17935413	2
GAGE1	chrX:49363615	2
UPK3BL	chr7:102283238	2
IL6R	chr1:154377668	2
CENPU	chr4:185655286	2
FAM225B	chr9:115873957	2
PPIEL	chr1:40025370	2
C5ORF51	chr5:41904469	2
DCST1	chr1:155006281	2
CELF2-AS2	chr10:11147451	2
BAGE3	chr21:11098925	2
ZBTB8B	chr1:32930657	2
LOC153910	chr6:142958973	2
ACOXL	chr2:111490149	2
PRR20A	chr13:57734765	2
PTPMT1	chr11:47586981	2
KRTAP22-1	chr21:31973439	2
NBPF25P	chr1:145289769	2
FAM95B1	chr9:43033312	2
CT45A6	chrX:134883487	2
LRRC25	chr19:18508415	2
NINJ2	chr12:719579	2
NKX6-3	chr8:41504878	2
SEMA5B	chr3:122747452	2
ARL3	chr10:104474190	2
MLLT10	chr10:21823100	2
SRFBP1	chr5:121297655	2
FAR2P2	chr2:131186119	2
MIR3680-2	chr16:21517456	2
SELENBP1	chr1:151345210	2
MLLT10P1	chr20:29638138	2
NSUN5P2	chr7:72425302	2
LINC00895	chr22:19554362	2
PAPOLA	chr14:96968712	2
SPN	chr16:29674539	2
KPNA3	chr13:50367057	2
FAM98B	chr15:38746327	2
ROPN1L-AS1	chr5:10441963	2
DEPDC5	chr22:32150008	2
SLC35E2	chr1:1677438	2
TRAF2	chr9:139780964	2
FMN1	chr15:33360233	2
FTH1	chr11:61735132	2
WDR91	chr7:134896316	2
CCL4	chr17:34431219	2
PRR20E	chr13:57734765	2
USP17L9P	chr4:9360107	2
GAGE12F	chrX:49306301	2
MX1	chr21:42792484	2
MIR663AHG	chr20:26189869	2
GPS2	chr17:7218658	2
ERI1	chr8:8860313	2
SQRDL	chr15:45926937	2
TSC22D1-AS1	chr13:45150031	2
ZNF148	chr3:125094198	2
RAP1GAP	chr1:21995856	2
TSC22D3	chrX:106959711	2
TRH	chr3:129693235	2
ZBTB43	chr9:129567284	2
MYBPH	chr1:203144942	2
REV3L	chr6:111804918	2
MIR3680-1	chr16:21517456	2
PNRC1	chr6:89790428	2
FNDC3A	chr13:49550744	2
TNN	chr1:175036993	2
CLVS1	chr8:62200524	2
2008-09-01	chr5:132113561	2
GALE	chr1:24127034	2
ARHGDIA	chr17:79828850	2
SLCO4C1	chr5:101632253	2
LOC401357	chr7:56880429	1.66667
FAM138F	chr1:36081	1.66667
CCZ1B	chr7:6865926	1.66667
UCKL1	chr20:62582527	1.66667
SLX1B-SULT1A4	chr16:29466411	1.66667
RNF111	chr15:59280344	1.66667
SAA4	chr11:18258384	1.66667
RSF1	chr11:77531880	1.66667
SLC30A4	chr15:45815002	1.66667
STYX	chr14:53196882	1.66667
HIAT1	chr1:100503788	1.66667
WDR31	chr9:116102620	1.66667
TBC1D3F	chr17:34591996	1.66667
LINC00544	chr13:30510667	1.66667
NBPF15	chr1:148558187	1.66667
BBC3	chr19:47736023	1.66667
ARL4A	chr7:12726910	1.66667
ERCC1	chr19:45926820	1.66667
TBC1D3L	chr17:36348623	1.66667
STAT1	chr2:191878976	1.66667
DLL4	chr15:41221530	1.66667
LOC102724601	chr1:174128425	1.66667
SPPL2A	chr15:51057910	1.66667
EEF1DP3	chr13:32420919	1.66667
TMEM97	chr17:26646120	1.66667
GLS	chr2:191745546	1.66667
GPR108	chr19:6737633	1.66667
BPY2B	chrY:25130409	1.66667
CDC25C	chr5:137674044	1.66667
UHMK1	chr1:162466963	1.66667
FAF1	chr1:51425936	1.66667
BANP	chr16:87985037	1.66667
PRAMEF19	chr1:13477569	1.66667
PITPNA-AS1	chr17:1420212	1.66667
DDX5	chr17:62502484	1.66667
TBC1D3H	chr17:34591996	1.66667
FAM138A	chr1:36081	1.66667
CHEK2P2	chr15:20487996	1.66667
FOXN2	chr2:48541794	1.66667
SNHG21	chr15:83419315	1.66667
NOTCH2	chr1:120612317	1.66667
TBC1D3	chr17:36348621	1.66667
TTLL9	chr20:30458504	1.66667
RAB32	chr6:146864827	1.66667
PTPN6	chr12:7060433	1.66667
XRCC6	chr22:42017345	1.66667
LOC102723859	chr17:36348607	1.66667
RHEBL1	chr12:49463808	1.66667
LINC00667	chr18:5238098	1.66667
GTPBP4	chr10:1034348	1.66667
DPP8	chr15:65809609	1.66667
BHLHE40-AS1	chr3:5021646	1.66667
PIK3R5	chr17:8869029	1.66667
OXLD1	chr17:79633667	1.66667
MPDU1	chr17:7486964	1.66667
CCR7	chr17:38717265	1.66667
RAB40AL	chrX:102192199	1.66667
C14ORF28	chr14:45366506	1.66667
MIR5095	chr16:48344528	1.66667
TMEM88	chr17:7758383	1.66667
REPIN1	chr7:150065878	1.66667
LOC100506127	chr11:76092356	1.66667
MIR4751	chr19:50436320	1.66667
TSHZ3	chr19:31840190	1.66667
CD52	chr1:26644410	1.66667
MRGPRX3	chr11:18142501	1.66667
C8ORF59	chr8:86132651	1.66667
LOC101060321	chr17:34591982	1.66667
ANXA4	chr2:69969126	1.66667
LOC606724	chr16:30200004	1.66667
LINC01359	chr1:65468159	1.66667
USP3	chr15:63796709	1.66667
LOC102724862	chr17:36348609	1.66667
CCNI	chr4:77997125	1.66667
LINC01450	chr7:41019537	1.66667
LOC101927623	chr9:88742454	1.66667
ZNF511	chr10:135122392	1.66667
FBXO34	chr14:55738871	1.66667
LRRC32	chr11:76381044	1.66667
RASGEF1B	chr4:82393082	1.66667
TIMM23	chr10:51623386	1.66667
RAB22A	chr20:56884770	1.66667
C2ORF27A	chr2:132480063	1.66667
GAGE8	chrX:49188103	1.66667
ZCCHC4	chr4:25314395	1.66667
PGAP2	chr11:3819188	1.66667
LOC101928530	chr12:133464427	1.66667
DSG1-AS1	chr18:29006951	1.66667
EDEM1	chr3:5229358	1.66667
KCNB1	chr20:48099181	1.66667
SLC25A28	chr10:101380221	1.66667
RBPJ	chr4:26321331	1.66667
CABP1	chr12:121088309	1.66667
DPF2	chr11:65101224	1.66667
YWHAZ	chr8:101963560	1.66667
PAX8-AS1	chr2:113993845	1.66667
GAGE2E	chrX:49188103	1.66667
LACC1	chr13:44453968	1.66667
MFAP3	chr5:153418518	1.66667
TMEM217	chr6:37225931	1.66667
PPP2CB	chr8:30670352	1.66667
CNTNAP4	chr16:76311175	1.66667
ATF5	chr19:50433460	1.66667
ANKRD20A2	chr9:42368302	1.66667
RIBC2	chr22:45809571	1.66667
WDHD1	chr14:55493819	1.66667
INHBC	chr12:57828467	1.66667
INTS4P2	chr7:65112766	1.66667
UBXN2A	chr2:24163375	1.66667
LINC01534	chr19:37178351	1.66667
LOC541473	chr7:72440164	1.66667
TOP1MT	chr8:144417061	1.66667
RBM17	chr10:6131308	1.66667
PTRF	chr17:40575338	1.66667
TCF21	chr6:134210259	1.66667
MKKS	chr20:10414887	1.66667
MIR5192	chr2:62432960	1.66667
RPL15	chr3:23958652	1.66667
APTR	chr7:77326662	1.66667
WASH5P	chr19:70966	1.66667
DDX11L2	chr2:114359153	1.66667
EHD1	chr11:64646240	1.66667
DDTL	chr22:24309025	1.66667
LINC00854	chr17:41381062	1.66667
NCR3LG1	chr11:17373308	1.66667
NCF1B	chr7:72634673	1.66667
USP17L6P	chr4:9369599	1.66667
LETM1	chr4:1857974	1.66667
LOC101060389	chr17:36348609	1.66667
SLC43A3	chr11:57195053	1.66667
ADAM9	chr8:38854504	1.66667
EEF1B2	chr2:207024317	1.66667
BPY2	chrY:25130409	1.66667
OSGIN2	chr8:90914095	1.66667
NDUFB10	chr16:2009516	1.66667
PIH1D2	chr11:111944895	1.66667
HIF1A	chr14:62162118	1.66667
TSEN34	chr19:54694118	1.66667
TMEM213	chr7:138482738	1.66667
MSH3	chr5:79950466	1.66667
CELF1	chr11:47574792	1.66667
ATF1	chr12:51157788	1.66667
RCHY1	chr4:76439640	1.66667
GTF2A2	chr15:59949737	1.66667
FXR2	chr17:7518215	1.66667
BPY2C	chrY:25130409	1.66667
PPP1R9B	chr17:48227878	1.66667
ARSD	chrX:2847416	1.66667
CMTM5	chr14:23846016	1.66667
ZNF615	chr19:52511483	1.66667
TBC1D3K	chr17:36348609	1.66667
MXD1	chr2:70142172	1.66667
ZNF418	chr19:58446740	1.66667
CLEC18C	chr16:70208075	1.66667
RYR3	chr15:33603162	1.66667
SFSWAP	chr12:132195631	1.66667
SLX1A-SULT1A3	chr16:29466411	1.66667
CISD2	chr4:103790134	1.66667
FAM90A27P	chr19:53785542	1.66667
RAB3IL1	chr11:61685081	1.66667
ADAP1	chr7:966852	1.66667
MIR1976	chr1:26881032	1.5
CD38	chr4:15779930	1.5
HGH1	chr8:145437879	1.5
MIR3180-3	chr16:16403731	1.5
OSER1	chr20:42839546	1.5
SOCS4	chr14:55493843	1.5
DDIT4L	chr4:101111655	1.5
GALR3	chr22:38219388	1.5
TMPRSS3	chr21:43809258	1.5
TAL1	chr1:47698007	1.5
MIR4423	chr1:85599476	1.5
LOC101929516	chr1:40030741	1.5
KLF3	chr4:38665789	1.5
FAM20A	chr17:66597095	1.5
ACBD5	chr10:27529808	1.5
CCDC137	chr17:79633760	1.5
KHK	chr2:27309610	1.5
LOC100132356	chr5:43067073	1.5
ARHGEF18	chr19:7459998	1.5
TM4SF19-AS1	chr3:196045202	1.5
SCLY	chr2:238969564	1.5
HSPE1-MOB4	chr2:198364720	1.5
DSCR3	chr21:38639833	1.5
TMEM128	chr4:4249969	1.5
ZNF575	chr19:44037339	1.5
CHAF1B	chr21:37757688	1.5
WNK1	chr12:862088	1.5
RASGRF1	chr15:79383215	1.5
FAM90A10P	chr8:7627105	1.5
FAM114A2	chr5:153418497	1.5
INMT-FAM188B	chr7:30791750	1.5
AGPAT6	chr8:41435706	1.5
SIRPA	chr20:1875825	1.5
HCG11	chr6:26521933	1.5
AMER1	chrX:63425624	1.5
OR14A16	chr1:247979031	1.5
ADPRH	chr3:119298279	1.5
WDR25	chr14:100842832	1.5
GAGE2A	chrX:49197581	1.5
ZNF93	chr19:20011721	1.5
MIR1302-10	chr19:71972	1.5
LINC00886	chr3:156534851	1.5
MGEA5	chr10:103578222	1.5
BTG2	chr1:203274663	1.5
MIR1302-9	chr19:71972	1.5
SNX25	chr4:186131283	1.5
COQ10B	chr2:198318230	1.5
CD83	chr6:14117864	1.5
ENTPD6	chr20:25176338	1.5
ATP6V0C	chr16:2563870	1.5
TAF1C	chr16:84220676	1.5
MCM3AP-AS1	chr21:47649144	1.5
PRKCI	chr3:169940219	1.5
TNK2	chr3:195622432	1.5
ERP29	chr12:112451151	1.5
MIR941-1	chr20:62551025	1.5
ARAP2	chr4:36245979	1.5
SOX2-OT	chr3:180774467	1.5
RRP12	chr10:99161127	1.5
RNF44	chr5:175964421	1.5
CXADR	chr21:18885223	1.5
RGPD5	chr2:110551965	1.5
KCTD10	chr12:109915155	1.5
ASAP1	chr8:131455906	1.5
SULT1A3	chr16:29471206	1.5
ATP5J	chr21:27107965	1.5
HIST2H2AA3	chr1:149822627	1.5
SLC39A8	chr4:103266348	1.5
GINS2	chr16:85722588	1.5
MIR1302-11	chr19:71972	1.5
CLOCK	chr4:56413076	1.5
MTRNR2L2	chr5:79946854	1.5
ROBO2	chr3:77147162	1.5
RNF40	chr16:30772932	1.5
DLD	chr7:107531551	1.5
MIR4520-2	chr17:6558767	1.5
FBXO11	chr2:48132932	1.5
IL17D	chr13:21277481	1.5
RCAN1	chr21:35896935	1.5
CCAR2	chr8:22462538	1.5
ABI3	chr17:47287588	1.5
LOC148696	chr1:207991723	1.5
MRAS	chr3:138067969	1.5
UPB1	chr22:24891250	1.5
PLEKHH1	chr14:68000007	1.5
LOC391003	chr1:13698405	1.5
TANGO6	chr16:68877508	1.5
FLVCR2	chr14:76071804	1.5
ITIH5	chr10:7708961	1.5
ABCG1	chr21:43640007	1.5
HIST2H2AA4	chr1:149822627	1.5
CAP1	chr1:40506254	1.5
N6AMT1	chr21:30257695	1.5
CASC2	chr10:119806331	1.5
KANSL1L	chr2:211036051	1.5
HSPE1	chr2:198364720	1.5
SUSD4	chr1:223537544	1.5
DCAF10	chr9:37800782	1.5
FBXO28	chr1:224301788	1.5
PHF3	chr6:64346385	1.5
SULT1A4	chr16:29471206	1.5
LMLN	chr3:197687070	1.5
TMEM165	chr4:56262079	1.5
BLM	chr15:91260557	1.5
MIR3180-1	chr16:16403731	1.5
MPHOSPH8	chr13:20207787	1.5
DHRS3	chr1:12677737	1.5
MIR136	chr14:101351038	1.5
DYRK1A	chr21:38739858	1.5
USP17L17	chr4:9245604	1.5
GEM	chr8:95274547	1.5
TM6SF2	chr19:19384074	1.5
NT5C1A	chr1:40137710	1.5
PCDHGA5	chr5:140743897	1.5
MIR1302-2	chr19:71972	1.5
ANAPC1P1	chr2:87088947	1.5
STAG1	chr3:136471245	1.5
CXADRP3	chr18:14498705	1.5
LOC101928979	chr1:145382404	1.5
FAM231D	chr1:149287450	1.5
ANKRD7	chr7:117864711	1.5
GAGE2C	chrX:49197595	1.5
GTF3C6	chr6:111279762	1.5
FBXL18	chr7:5553399	1.5
ADAMTS2	chr5:178772431	1.5
SLC7A5P2	chr16:21531765	1.5
BCAR3	chr1:94147394	1.5
PTGER4	chr5:40680031	1.5
ACTR3B	chr7:152456833	1.5
DHRS4L2	chr14:24439223	1.5
MYADM	chr19:54371798	1.5
MIS18A	chr21:33651376	1.5
MAU2	chr19:19431629	1.5
LEPROT	chr1:65886398	1.5
PHLDB1	chr11:118478305	1.5
NCKAP5	chr2:134326031	1.5
RBM47	chr4:40631883	1.5
PTCHD4	chr6:48036425	1.5
INMT	chr7:30791750	1.5
MIR3180-2	chr16:16403735	1.5
ZNF295-AS1	chr21:43429302	1.5
TRIM8	chr10:104404251	1.5
ABR	chr17:1083268	1.33333
PLEKHG4	chr16:67313426	1.33333
RABGGTB	chr1:76251878	1.33333
PSMB8	chr6:32812712	1.33333
MDM2	chr12:69201951	1.33333
TACSTD2	chr1:59043166	1.33333
IER5	chr1:181057637	1.33333
HLA-C	chr6:31239913	1.33333
STX6	chr1:180992257	1.33333
MIR6510	chr17:39673469	1.33333
MIR7845	chr2:208031123	1.33333
TOM1	chr22:35695796	1.33333
ATL3	chr11:63439202	1.33333
FOSL2	chr2:28615778	1.33333
NTMT1	chr9:132388722	1.33333
HERC4	chr10:69835103	1.33333
PEMT	chr17:17495017	1.33333
SMEK2	chr2:55844860	1.33333
RTKN2	chr10:64028622	1.33333
CYTH4	chr22:37678494	1.33333
BBOX1-AS1	chr11:27241660	1.33333
DYRK3	chr1:206808880	1.33333
YWHAG	chr7:75988342	1.33333
MIR1273C	chr6:155174493	1.33333
VENTX	chr10:135051407	1.33333
TTI1	chr20:36661870	1.33333
GSDMB	chr17:38074903	1.33333
MIR512-2	chr19:54169926	1.33333
ADORA2A	chr22:24819564	1.33333
TIGD1	chr2:233415300	1.33333
OTP	chr5:76934522	1.33333
EPHX2	chr8:27348684	1.33333
SS18	chr18:23670611	1.33333
LINC01411	chr5:173763356	1.33333
LOC101929762	chr4:120133799	1.33333
SLC6A9	chr1:44497164	1.33333
CCL3	chr17:34417506	1.33333
BOLA2B	chr16:30205627	1.33333
BANF2	chr20:17674319	1.33333
FBXL19-AS1	chr16:30934590	1.33333
SVIL	chr10:30024730	1.33333
LOC100507002	chr17:63096929	1.33333
PES1	chr22:30987927	1.33333
FAM3C	chr7:121036422	1.33333
FAM226B	chrX:72163589	1.33333
DBI	chr2:120124623	1.33333
CHEK2	chr22:29137822	1.33333
CCZ1	chr7:5938340	1.33333
LOC642236	chr9:68454375	1.33333
ISL2	chr15:76629064	1.33333
PEX1	chr7:92157845	1.33333
USP53	chr4:120133781	1.33333
CMTM2	chr16:66613350	1.33333
ZNF354B	chr5:178286953	1.33333
C11ORF57	chr11:111944967	1.33333
GPD2	chr2:157292899	1.33333
CDKN2A	chr9:21994490	1.33333
ARF6	chr14:50359735	1.33333
ALG11	chr13:52586522	1.33333
MCTP2	chr15:94841429	1.33333
MIR512-1	chr19:54169932	1.33333
SNAP29	chr22:21213291	1.33333
ARPC1B	chr7:98972297	1.33333
CFLAR	chr2:201983268	1.33333
CLASRP	chr19:45542297	1.33333
BTRC	chr10:103113789	1.33333
IDH2	chr15:90645786	1.33333
ELOVL7	chr5:60140101	1.33333
TPTEP1	chr22:17082800	1.33333
MC1R	chr16:89984286	1.33333
KIAA2026	chr9:6008003	1.33333
SH3TC1	chr4:8201059	1.33333
PIAS2	chr18:44497495	1.33333
FMNL3	chr12:50101197	1.33333
MRPS2	chr9:138392476	1.33333
RGS9	chr17:63133455	1.33333
PPFIBP2	chr11:7534995	1.33333
DHRS11	chr17:34948225	1.33333
LOC401463	chr8:65489820	1.33333
RPRD1B	chr20:36661947	1.33333
NPIPB5	chr16:22524843	1.33333
C5AR2	chr19:47843743	1.33333
IL10RA	chr11:117857105	1.33333
LOC285074	chr2:87303536	1.33333
KDELR2	chr7:6523849	1.33333
CCRN4L	chr4:139936912	1.33333
AKAP10	chr17:19881169	1.33333
BOLA2	chr16:30205627	1.33333
FAM226A	chrX:72163589	1.33333
LOC100499194	chr2:114737561	1.33333
LDB2	chr4:16900432	1.33333
UBE4B	chr1:10093040	1.33333
KIF13B	chr8:29120610	1.33333
SMAD5	chr5:135468533	1.33333
DIXDC1	chr11:111807926	1.33333
LOC101926963	chr7:642481	1.33333
ZNF254	chr19:24216206	1.33333
NOP10	chr15:34635362	1.33333
HIPK3	chr11:33279876	1.33333
CD68	chr17:7482805	1.33333
TSSC4	chr11:2421717	1.33333
TMEM70	chr8:74888376	1.33333
PLGRKT	chr9:5437937	1.33333
RAB9A	chrX:13707239	1.33333
HSDL2	chr9:115142188	1.33333
MYL4	chr17:45286713	1.33333
ZCCHC18	chrX:103357216	1.33333
SDC4	chr20:43977064	1.33333
EXOSC5	chr19:41903256	1.33333
LIMK2	chr22:31608249	1.33333
LOC100506860	chr7:130598222	1.33333
HIPK1-AS1	chr1:114471880	1.33333
BCL3	chr19:45251977	1.33333
TLCD1	chr17:27053949	1.33333
HLX-AS1	chr1:221053482	1.33333
THAP6	chr4:76439653	1.33333
USP17L1	chr8:7189908	1.33333
SCNM1	chr1:151138497	1.33333
MSRB3	chr12:65672766	1.33333
ANKRD20A3	chr9:42368336	1.33333
MS4A13	chr11:60282885	1.33333
CHPF2	chr7:150929574	1.33333
RNF152	chr18:59560304	1.33333
CMAS	chr12:22199109	1.33333
LOC100130705	chr7:128506463	1.33333
ZNF668	chr16:31084823	1.33333
BAIAP2	chr17:79008946	1.33333
LOC100133920	chr9:69651360	1.33333
ATP6V0D1	chr16:67515089	1.33333
PEX13	chr2:61244811	1.33333
MCCC2	chr5:70883114	1.33333
FLJ10038	chr15:50647076	1.33333
MZF1-AS1	chr19:59070552	1.33333
IFI44L	chr1:79086066	1.33333
EFCAB6	chr22:44208217	1.33333
LOC441081	chr5:69782327	1.33333
CTSZ	chr20:57582309	1.33333
SSBP1	chr7:141438406	1.33333
EP400	chr12:132434464	1.33333
POTEG	chr14:19553364	1.33333
GPRC5C	chr17:72427666	1.33333
CLN6	chr15:68522080	1.33333
SRSF7	chr2:38978636	1.33333
TTC39A	chr1:51810788	1.33333
SAMD11	chr1:861120	1.33333
ICA1	chr7:8302242	1.33333
SIRT1	chr10:69644938	1.33333
WDR1	chr4:10118573	1.33333
STK38L	chr12:27397077	1.33333
CFC1	chr2:131357148	1.33333
MARCKS	chr6:114178513	1.33333
FAM27E2	chr9:46116942	1.33333
NFIB	chr9:14180801	1.33333
MLST8	chr16:2255731	1.33333
TMEM161A	chr19:19249310	1.33333
CCT5	chr5:10250648	1.33333
ELMO2	chr20:45035271	1
C6ORF226	chr6:42858554	1
GGT3P	chr22:18779474	1
SLC10A7	chr4:147443123	1
BRIX1	chr5:34915819	1
DDB1	chr11:61100684	1
DTNBP1	chr6:15663289	1
SALRNA1	chr14:61105933	1
GRM2	chr3:51741080	1
C14ORF80	chr14:105956519	1
LHB	chr19:49520347	1
TMC3-AS1	chr15:81616673	1
GDPD5	chr11:75236599	1
FOXE1	chr9:100615536	1
CNGA3	chr2:98962617	1
TNNT3	chr11:1940798	1
EIF1	chr17:39845126	1
FPGT	chr1:74663895	1
C15ORF62	chr15:41062158	1
KIAA0100	chr17:26972177	1
HS2ST1	chr1:87380334	1
CD82	chr11:44587140	1
METTL25	chr12:82752275	1
EMILIN1	chr2:27301434	1
TP53TG3C	chr16:33205584	1
SF3B6	chr2:24299314	1
IDO2	chr8:39792473	1
LOC654342	chr2:91847975	1
DNAH17-AS1	chr17:76480991	1
TRIM64C	chr11:49080664	1
CDH8	chr16:62070739	1
SLC9A3R1	chr17:72744750	1
ZNF350	chr19:52490079	1
TTC41P	chr12:104323989	1
PRND	chr20:4702499	1
UIMC1	chr5:176433443	1
ZNF146	chr19:36705503	1
VWCE	chr11:61062788	1
TAB2	chr6:149639435	1
HIST1H4L	chr6:27841289	1
MIR4727	chr17:36982090	1
MIR4444-1	chr3:75263626	1
TCTA	chr3:49449638	1
B2M	chr15:45003684	1
ZMYM6NB	chr1:35450948	1
IL20RA	chr6:137366317	1
BTBD10	chr11:13461826	1
TDRD9	chr14:104394816	1
WSB1	chr17:25621105	1
TOMM22	chr22:39077953	1
DACT3-AS1	chr19:47163620	1
CGRRF1	chr14:54976586	1
SERF2-C15ORF63	chr15:44084173	1
FARS2	chr6:5261583	1
PYURF	chr4:89444952	1
C16ORF95	chr16:87351026	1
TBPL2	chr14:55907263	1
HMBS	chr11:118958696	1
GBA2	chr9:35749225	1
FLJ41200	chr9:13431328	1
GRAMD1C	chr3:113557680	1
USP38	chr4:144106069	1
HIST1H4B	chr6:26027480	1
ALDH1L1	chr3:125899645	1
EIF4E	chr4:99850243	1
HEATR5A	chr14:31889788	1
CACNA1C-AS4	chr12:2332647	1
PKN3	chr9:131464801	1
MIR4741	chr18:20513311	1
C8ORF76	chr8:124253638	1
RFT1	chr3:53164470	1
ZDHHC3	chr3:45017674	1
OR5L2	chr11:55594694	1
MAPKAPK3	chr3:50649292	1
PRKD2	chr19:47217577	1
OR4C3	chr11:48346492	1
NAA38	chr17:7761172	1
KCNA3	chr1:111217655	1
LINC01102	chr2:105050804	1
2002-09-01	chr2:242254601	1
KCNG3	chr2:42721237	1
NCOR1	chr17:16118874	1
SLC3A2	chr11:62648343	1
PSMG3-AS1	chr7:1609708	1
PRKRIP1	chr7:102036803	1
INHBE	chr12:57849095	1
SOX6	chr11:16497935	1
RPUSD2	chr15:40861491	1
NAB1	chr2:191513847	1
BRMS1L	chr14:36295596	1
MIR3173	chr14:95604323	1
CDCA2	chr8:25316512	1
SIGLEC5	chr19:52133727	1
SNHG22	chr18:47340392	1
CHCHD6	chr3:126423062	1
LINC01317	chr2:33931952	1
LOC102724663	chr12:81672967	1
MBP	chr18:74729055	1
LOC101928443	chr11:69911477	1
LOC101927973	chr21:29600986	1
KLC2	chr11:66025173	1
HDAC1	chr1:32757707	1
FNDC3B	chr3:171757417	1
PCDHGB3	chr5:140749830	1
SUZ12P1	chr17:29036625	1
C9ORF24	chr9:34381598	1
KDM2B	chr12:122018920	1
CHRM3	chr1:239792372	1
SNORD115-29	chr15:25494344	1
SLC25A51	chr9:37904350	1
OR2M3	chr1:248366369	1
UPF2	chr10:12084840	1
SORBS3	chr8:22423178	1
CD101	chr1:117544371	1
AGBL2	chr11:47736928	1
LOC283922	chr16:74402153	1
MYLK3	chr16:46782221	1
KCNMB4	chr12:70760061	1
KCNJ11	chr11:17410878	1
LOC100507389	chr3:142645516	1
BMP2K	chr4:79697531	1
MIR6892	chr7:143079778	1
HIST2H2BE	chr1:149858232	1
LOC154761	chr7:143533810	1
C2ORF40	chr2:106682112	1
SENP5	chr3:196594726	1
GMPR2	chr14:24702077	1
KDM4A-AS1	chr1:44173012	1
ERBB4	chr2:213403352	1
SLC6A2	chr16:55690555	1
MIR146A	chr5:159912358	1
ZNF783	chr7:148959261	1
CCDC12	chr3:47023500	1
IRF2BP2	chr1:234745271	1
ARHGAP17	chr16:25026699	1
KCNIP3	chr2:95963071	1
SFPQ	chr1:35658743	1
PCBP1-AS1	chr2:70314147	1
TIGD6	chr5:149380730	1
STAG2	chrX:123094409	1
CD55	chr1:207494816	1
RPS23	chr5:81574235	1
CACNB3	chr12:49208214	1
SKP1	chr5:133512724	1
SLC25A1	chr22:19166018	1
EZH2	chr7:148581441	1
RNASEK	chr17:6915735	1
LINC01159	chr2:105489053	1
PI4KA	chr22:21213100	1
TMC2	chr20:2517252	1
PPAP2C	chr19:291169	1
ANKRD28	chr3:15798058	1
GSN-AS1	chr9:124047808	1
WHAMMP2	chr15:28982728	1
MIR23A	chr19:13947473	1
HSPB11	chr1:54411288	1
LINC01412	chr2:145279434	1
ERMP1	chr9:5833081	1
SCD5	chr4:83720010	1
LSG1	chr3:194393206	1
SLC47A1	chr17:19437166	1
PSMC6	chr14:53173895	1
CTAGE7P	chr10:131904272	1
SV2B	chr15:91643538	1
DLG4	chr17:7123369	1
LOC100506136	chr7:96293650	1
MAPRE3	chr2:27237621	1
RNF19B	chr1:33430414	1
PCDHA9	chr5:140227356	1
FBXO5	chr6:153304203	1
HK1	chr10:71078602	1
MIR4454	chr5:12667970	1
EREG	chr4:75230859	1
AQR	chr15:35261995	1
RPL13AP5	chr19:49990864	1
ASRGL1	chr11:62104773	1
SLC26A11	chr17:78194199	1
2007-03-01	chr2:160568967	1
ARRDC4	chr15:98503932	1
PLEKHF2	chr8:96145948	1
GAGE2D	chrX:49197562	1
LOC100507373	chr19:14247963	1
KLK15	chr19:51334779	1
SCGB2B2	chr19:35085490	1
TRPM5	chr11:2444275	1
KIF3B	chr20:30865453	1
POLR2D	chr2:128615729	1
LOC728485	chr19:37264019	1
NDUFV3	chr21:44313377	1
MAPT-IT1	chr17:43973148	1
ATP6V1B2	chr8:20054703	1
CCNL1	chr3:156878482	1
TOMM6	chr6:41755180	1
MSL3P1	chr2:234777055	1
NUBP1	chr16:10837642	1
SLC16A6	chr17:66287405	1
USP17L13	chr4:9226621	1
MYO15A	chr17:18012019	1
LOC101928307	chr6:69344216	1
MBNL1	chr3:151985828	1
LOC102723376	chr18:12074	1
TUBB6	chr18:12308057	1
NGLY1	chr3:25831530	1
ASB6	chr9:132404448	1
MIR3064	chr17:62496957	1
CEBPG	chr19:33864574	1
THNSL1	chr10:25305507	1
JAM2	chr21:27011593	1
ISG20	chr15:89181973	1
PC	chr11:66725847	1
ZNF34	chr8:146012730	1
NOMO2	chr16:18573434	1
FAM210A	chr18:13726591	1
FBXW11	chr5:171433877	1
NRIP3	chr11:9025596	1
ZMYND12	chr1:42921938	1
SLC41A3	chr3:125803134	1
C4ORF33	chr4:130014828	1
TLE6	chr19:2977535	1
TGIF2-C20ORF24	chr20:35202956	1
KIAA1328	chr18:34409079	1
DESI2	chr1:244816349	1
TTC23	chr15:99791431	1
UGP2	chr2:64069013	1
LOC283070	chr10:12875132	1
C8ORF58	chr8:22457113	1
ZFHX3	chr16:73082274	1
SCRIB	chr8:144897549	1
RNF130	chr5:179499118	1
LOC100996348	chr8:86376562	1
GPRC5B	chr16:19896956	1
TMEM2	chr9:74383800	1
FBXO32	chr8:124544383	1
GATM	chr15:45670980	1
CDKN3	chr14:54863672	1
ARHGAP22	chr10:49813176	1
LINC01521	chr22:31742744	1
PAK2	chr3:196466727	1
SNORD115-11	chr15:25494344	1
PIGX	chr3:196439244	1
2001-12-01	chr9:117904096	1
TFAMP1	chr7:1654105	1
UBE2F-SCLY	chr2:238875586	1
OAZ2	chr15:64995480	1
FAM63B	chr15:59063392	1
CPLX3	chr15:75118950	1
GHR	chr5:42548314	1
LINC01269	chr14:71165414	1
LRRC8D	chr1:90287479	1
SRSF6	chr20:42086503	1
MRAP	chr21:33664123	1
C6ORF203	chr6:107349375	1
C2ORF82	chr2:233734993	1
ERLIN2	chr8:37594196	1
EFHC1	chr6:52284993	1
GHRL	chr3:10334631	1
MICU1	chr10:74385949	1
ZNF24	chr18:32924426	1
OXTR	chr3:8811300	1
SUV39H2	chr10:14920898	1
EPX	chr17:56270088	1
VASH1	chr14:77228234	1
IGFBP7-AS1	chr4:57975927	1
CD99	chrX:2609227	1
TMED9	chr5:177019212	1
PJA2	chr5:108745675	1
ASH1L	chr1:155532324	1
USP4	chr3:49377536	1
CTAG1A	chrX:153813417	1
NGFRAP1	chrX:102632108	1
EDAR	chr2:109605828	1
IL1A	chr2:113542971	1
MEMO1	chr2:32235733	1
SENP8	chr15:72409245	1
GABPB1-AS1	chr15:50646370	1
FDFT1	chr8:11665925	1
ARFGEF2	chr20:47538274	1
TGIF2	chr20:35202956	1
SMCHD1	chr18:2655885	1
UBE2Q2	chr15:76135626	1
ZNF565	chr19:36705575	1
SCCPDH	chr1:246887377	1
KAT8	chr16:31128984	1
SRRT	chr7:100472700	1
ITGB8	chr7:20370724	1
CTU2	chr16:88772890	1
LIMS1	chr2:109271267	1
HIST1H2AG	chr6:27100816	1
OR4F29	chr1:367658	1
NUF2	chr1:163291722	1
CAHM	chr6:163834982	1
ZBTB4	chr17:7387568	1
ADGRF2	chr6:47624325	1
RERE	chr1:8483747	1
UCHL3	chr13:76123885	1
LOC100507351	chr17:75543022	1
MDGA1	chr6:37665766	1
PAGE1	chrX:49460596	1
CCR6	chr6:167525294	1
ZNF365	chr10:64133915	1
ANGPTL4	chr19:8429010	1
IRX6	chr16:55358470	1
MIR3615	chr17:72744751	1
OXSM	chr3:25831562	1
HOXB4	chr17:46655743	1
LOC101927027	chr2:179278385	1
REXO4	chr9:136283216	1
BAZ2B	chr2:160568946	1
HRASLS2	chr11:63330855	1
PHACTR2	chr6:143999101	1
RBBP8	chr18:20513294	1
STARD4	chr5:110848157	1
DNAAF2	chr14:50101948	1
SNORD116-12	chr15:25322196	1
CALN1	chr7:71877360	1
GRID2	chr4:93225549	1
NTF3	chr12:5603297	1
FOXB2	chr9:79634570	1
KGFLP1	chr9:46687556	1
LOC103171574	chr15:84977216	1
LOC100272216	chr5:68929028	1
IL1RN	chr2:113885137	1
GRINA	chr8:145064225	1
GABRB3	chr15:26961912	1
PCBD1	chr10:72648011	1
LCP2	chr5:169724822	1
SMG7	chr1:183441505	1
NPIPA2	chr16:14844669	1
TMEM120A	chr7:75623992	1
FGD3	chr9:95709600	1
SERF2	chr15:44069293	1
LMOD2	chr7:123295860	1
WDR83OS	chr19:12780465	1
AGXT	chr2:241808161	1
LOC646903	chr3:149689065	1
BEND3	chr6:107435636	1
JDP2	chr14:75898836	1
SGK3	chr8:67687415	1
GCN1L1	chr12:120632513	1
LINC00364	chr13:67946518	1
NAT1	chr8:18079176	1
PEAR1	chr1:156863522	1
HNRNPA1	chr12:54674487	1
RANBP9	chr6:13711796	1
LNX1	chr4:54424436	1
LINC00526	chr18:5238028	1
RGPD6	chr2:111336309	1
SPHK2	chr19:49122789	1
CD3EAP	chr19:45909466	1
AVP	chr20:3065370	1
AGPAT9	chr4:84457469	1
SLIT1-AS1	chr10:98862512	1
NFE2	chr12:54694821	1
ATP1A3	chr19:42498428	1
PNKP	chr19:50370822	1
MATR3	chr5:138609440	1
LOC101927318	chr12:50356566	1
GK	chrX:30671475	1
DNAJB1	chr19:14628674	1
IKZF5	chr10:124768203	1
RFC3	chr13:34392205	1
SNRNP70	chr19:49588396	1
DEFB116	chr20:29896388	1
PLA2G2A	chr1:20306152	1
SLC25A16	chr10:70287280	1
LOC101927354	chr7:7294784	1
KIF5B	chr10:32345371	1
LOC155060	chr7:148982371	1
CSDE1	chr1:115300671	1
ELF3	chr1:201979689	1
CAMK2D	chr4:114683083	1
SWT1	chr1:185126290	1
PPARG	chr3:12330435	1
PARP14	chr3:122399671	1
LOC101927056	chr3:125604920	1
TMEM171	chr5:72416387	1
C3ORF33	chr3:155524055	1
NPTX2	chr7:98246596	1
SMIM12	chr1:35325338	1
LINC00428	chr13:43446880	1
GAGE4	chrX:49216648	1
PPP1R3B	chr8:9009152	1
LCMT1-AS1	chr16:25122876	1
TWF2	chr3:52273183	1
TNNI2	chr11:1860718	1
RPL22	chr1:6259679	1
HR	chr8:21988565	1
CCDC134	chr22:42196625	1
DRAM1	chr12:102271104	1
TBX1	chr22:19744225	1
MIR4754	chr19:58898225	1
CRYM-AS1	chr16:21312169	1
PLEKHA1	chr10:124134093	1
LOC101928718	chr1:112298131	1
NDUFV2-AS1	chr18:9136718	1
QRFP	chr9:133769225	1
CXXC5	chr5:139028300	1
FAM90A7P	chr8:7431920	1
CCNC	chr6:100016690	1
IQCB1	chr3:121553926	1
ACADS	chr12:121163540	1
ANXA5	chr4:122618147	1
MIR6880	chr12:124821788	1
C20ORF203	chr20:31239783	1
M1AP	chr2:74875164	1
HLA-F	chr6:29691116	1
MEN1	chr11:64578766	1
BDH1	chr3:197282858	1
WWTR1-AS1	chr3:149375996	1
ZNF276	chr16:89787951	1
LINC01118	chr2:47043806	1
CEP78	chr9:80850990	1
MLLT6	chr17:36861872	1
PIWIL4	chr11:94300473	1
MIR3119-1	chr1:170120603	1
AK4	chr1:65613849	1
MT1L	chr16:56651372	1
REEP5	chr5:112258031	1
ZNF844	chr19:12175545	1
HINT2	chr9:35815042	1
GNAQ	chr9:80646365	1
CKAP2	chr13:53029494	1
PRR34	chr22:46450024	1
AUNIP	chr1:26185949	1
DNPH1	chr6:43197211	1
GNB2L1	chr5:180670906	1
SIX3-AS1	chr2:45168646	1
TNIP2	chr4:2757752	1
GPR146	chr7:1094910	1
VAMP3	chr1:7831328	1
EIF3C	chr16:28415209	1
PROM1	chr4:16085594	1
WTAP	chr6:160148531	1
NECAB3	chr20:32262264	1
CCNH	chr5:86708721	1
OSBPL11	chr3:125314381	1
FYTTD1	chr3:197477260	1
IRGQ	chr19:44100287	1
SLC26A5	chr7:103086624	1
CRK	chr17:1359561	1
CDK19	chr6:111136519	1
MAD2L1BP	chr6:43603576	1
TYRO3P	chr15:76552493	1
VWA5B2	chr3:183948316	1
FAM217B	chr20:58508818	1
NPTN	chr15:73925753	1
LOC101928438	chr9:102582171	1
PPP1R35	chr7:100034094	1
ITPKC	chr19:41223007	1
MICALL2	chr7:1499109	1
NUDT5	chr10:12238143	1
UBP1	chr3:33481870	1
CCDC92	chr12:124456637	1
MED22	chr9:136215011	1
TTC9	chr14:71108503	1
SYNPR-AS1	chr3:63535727	1
PSMB10	chr16:67970780	1
GABARAPL2	chr16:75600248	1
LOC100128714	chr15:26147506	1
UTP11L	chr1:38478383	1
SPG20-AS1	chr13:36920567	1
SPANXN3	chrX:142605303	1
HIPK1	chr1:114471995	1
C9ORF84	chr9:114557288	1
IL11RA	chr9:34652181	1
DNAJC19	chr3:180707306	1
PLA2G4E-AS1	chr15:42264960	1
NAGPA	chr16:5083942	1
TRIB3	chr20:361272	1
TMX4	chr20:8000476	1
LOC145783	chr15:57210697	1
LY6K	chr8:143781528	1
CLC	chr19:40228669	1
LINC01138	chr1:143744519	1
GRK1	chr13:114321596	1
KIAA0020	chr9:2844130	1
COPS4	chr4:83956238	1
BCL2	chr18:60986613	1
CNOT1	chr16:58663790	1
LOC101927359	chr4:134070271	1
C18ORF32	chr18:47013644	1
MIR4261	chr2:10332797	1
FANCC	chr9:98079536	1
UBE2L6	chr11:57335180	1
AGTPBP1	chr9:88356944	1
NOP58	chr2:203130514	1
SF3A3	chr1:38455761	1
LOC101928858	chr5:67089040	1
MYEOV2	chr2:241075747	1
PSMF1	chr20:1099239	1
SPINK5	chr5:147443534	1
MT1G	chr16:56701977	1
HS1BP3	chr2:20850864	1
NPFFR2	chr4:72904848	1
ERMAP	chr1:43282775	1
MYCBPAP	chr17:48585744	1
MIRLET7F2	chrX:53584235	1
CPVL	chr7:29186153	1
FAM177A1	chr14:35515609	1
SIX2	chr2:45236542	1
NAV2-AS4	chr11:19545625	1
LOC100101148	chr7:72440212	1
C10ORF142	chr10:44788197	1
SDHD	chr11:111957547	1
LYPD3	chr19:43969831	1
AGER	chr6:32152099	1
LOC100128398	chr19:58514261	1
SIGLEC1	chr20:3687775	1
SULF2	chr20:46415360	1
NUB1	chr7:151038846	1
OR11H12	chr14:19377593	1
C21ORF91	chr21:19191703	1
MELK	chr9:36572858	1
PARVB	chr22:44464996	1
SF3B5	chr6:144416754	1
ARHGAP10	chr4:148653452	1
SLC23A3	chr2:220034817	1
GPD1L	chr3:32148002	1
FSD1	chr19:4304590	1
NCOA6	chr20:33413433	1
MAN1A2	chr1:117910084	1
MIR6769B	chr1:206648145	1
ELK4	chr1:205602000	1
TRIM6	chr11:5617330	1
WFS1	chr4:6271576	1
C4ORF36	chr4:87813575	1
HACL1	chr3:15643359	1
OR2V1	chr5:180552304	1
SCAMP4	chr19:1905372	1
WDR33	chr2:128568761	1
MIR5090	chr7:102106188	1
CDON	chr11:125933187	1
POTEC	chr18:14543599	1
APPL2	chr12:105627183	1
ZNF763	chr19:12075868	1
PRC1	chr15:91537881	1
LINC00273	chr16:33962503	1
LINC00211	chr2:38056854	1
TMC5	chr16:19422056	1
D2HGDH	chr2:242673993	1
TCERG1	chr5:145826872	1
KLF17	chr1:44584521	1
LOC728752	chr19:36980528	1
ELMO1	chr7:37024717	1
MAP3K4	chr6:161412758	1
GNG11	chr7:93551015	1
NABP1	chr2:192542861	1
KRBOX1	chr3:42977833	1
MIR4642	chr6:44403377	1
SNAPC2	chr19:7985866	1
PEG3	chr19:57352094	1
SGSH	chr17:78194199	1
GALT	chr9:34646585	1
HERC5	chr4:89378267	1
RNH1	chr11:507283	1
MIR202HG	chr10:135061389	1
CDKN1A	chr6:36646486	1
CTRL	chr16:67965778	1
TP53TG3D	chr16:32264644	1
ZHX1	chr8:124286727	1
SWI5	chr9:131038424	1
TYW1	chr7:66461791	1
DCN	chr12:91573359	1
AMPD2	chr1:110168048	1
NRBF2	chr10:64893006	1
TSFM	chr12:58176527	1
PCOLCE2	chr3:142608045	1
MAP2K3	chr17:21187967	1
CWF19L2	chr11:107328572	1
ZBTB32	chr19:36203829	1
HORMAD1	chr1:150693364	1
UBR4	chr1:19536746	1
LTBP3	chr11:65325699	1
LOC81691	chr16:20817766	1
MAST3	chr19:18208602	1
TTC26	chr7:138818489	1
MIR548AO	chr5:92922830	1
ACTR2	chr2:65454828	1
LCE1F	chr1:152748847	1
KANK1	chr9:470293	1
ZNF554	chr19:2819871	1
RAE1	chr20:55926617	1
MAATS1	chr3:119421868	1
ID3	chr1:23886285	1
TM9SF1	chr14:24664942	1
POLG2	chr17:62493184	1
LINC01106	chr2:111142113	1
USP20	chr9:132597695	1
LAPTM4A	chr2:20251789	1
PTPN12	chr7:77166772	1
FAM13A-AS1	chr4:89630939	1
ARPP21	chr3:35721278	1
NAPG	chr18:10525872	1
LINC01220	chr14:75761106	1
RBM33	chr7:155437202	1
SYT10	chr12:33592754	1
UBE2I	chr16:1359153	1
LOC100287015	chr8:6264069	1
MIR4444-2	chr3:75263626	1
ACRC	chrX:70797873	1
BTBD17	chr17:72357958	1
DRAXIN	chr1:11751780	1
ALDH4A1	chr1:19217385	1
JAKMIP2	chr5:147162411	1
COA6	chr1:234509446	1
CD36	chr7:80267831	1
PRKG2	chr4:82075311	1
ZNF692	chr1:249153125	1
SH3GLB1	chr1:87170252	1
KBTBD6	chr13:41706936	1
KCTD18	chr2:201374792	1
C1QTNF5	chr11:119211593	1
LOC101927305	chr4:132685992	1
TCF12	chr15:57210832	1
MYNN	chr3:169490852	1
MIR5587	chr16:585315	1
CSTF2T	chr10:53459355	1
IREB2	chr15:78730517	1
MIR4424	chr1:178646883	1
EARS2	chr16:23568696	1
FLJ38122	chr6:170581561	1
RNU11	chr1:28975111	1
SOX30	chr5:157079428	1
MIR4443	chr3:48238053	1
PLEKHG3	chr14:65171192	1
AKR7A2	chr1:19638640	1
NAA50	chr3:113465120	1
SMIM7	chr19:16770968	1
CACUL1	chr10:120514758	1
CA5BP1	chrX:15693038	1
IFT74-AS1	chr9:26956305	1
ADO	chr10:64564515	1
HIST1H3G	chr6:26271612	1
LINC01191	chr2:114737145	1
VMAC	chr19:5904851	1
ACSL5	chr10:114133915	1
CAMK2N1	chr1:20812728	1
SUN2	chr22:39152024	1
PRKAG2	chr7:151574316	1
CELF3	chr1:151688792	1
H2AFX	chr11:118966177	1
WASF3	chr13:27131839	1
GABRA6	chr5:161112657	1
MIR581	chr5:53247429	1
MMP24-AS1	chr20:33865960	1
USP37	chr2:219433084	1
PPT2-EGFL8	chr6:32121775	1
NAA35	chr9:88556056	1
MTX3	chr5:79287088	1
HDHD1	chrX:7066231	1
CNEP1R1	chr16:50059116	1
MIR6787	chr17:80194543	1
GLYATL1	chr11:58695101	1
UPK1A-AS1	chr19:36164193	1
GOLGA8M	chr15:28957567	1
GNL3L	chrX:54556643	1
DPT	chr1:168698442	1
PARGP1	chr10:51371344	1
LOC400043	chr12:54519854	1
ZNF337-AS1	chr20:25604860	1
LOC101929224	chr1:200638634	1
NME2	chr17:49244082	1
FAM231A	chr1:16999497	1
LOC101927257	chr22:40917803	1
HIST1H2BG	chr6:26216872	1
AIFM2	chr10:71892690	1
HNRNPF	chr10:43904332	1
BRAT1	chr7:2595392	1
C11ORF87	chr11:109292845	1
MND1	chr4:154265800	1
CD79A	chr19:42381189	1
OR10G8	chr11:123900329	1
HTT	chr4:3076236	1
ST20	chr15:80215664	1
PABPC4	chr1:40042521	1
CXCL12	chr10:44880545	1
ABCB10	chr1:229694442	1
GAGE12I	chrX:49216676	1
SF3B1	chr2:198299771	1
TSNARE1	chr8:143484610	1
TNS4	chr17:38657854	1
ANK1	chr8:41655140	1
HNF4A	chr20:42984440	1
GABRR1	chr6:89941007	1
LRWD1	chr7:102105389	1
SMIM14	chr4:39640481	1
C1QB	chr1:22979681	1
MLF2	chr12:6862636	1
NRADDP	chr3:47053031	1
C2CD2	chr21:43346799	1
MIR4477B	chr9:68415307	1
DDX11L5	chr9:11986	1
HSD52	chr1:59612479	1
ZNF517	chr8:146024260	1
ZNF587	chr19:58361180	1
LOC728730	chr2:39664556	1
ABCA9-AS1	chr17:67000854	1
MIR17	chr13:92002858	1
CAP2	chr6:17393735	1
COPB1	chr11:14521404	1
TMOD1	chr9:100263461	1
INAFM1	chr19:47777658	1
CLEC16A	chr16:11038344	1
MMD	chr17:53499341	1
WSB2	chr12:118499979	1
RAD51AP2	chr2:17699706	1
PLEKHA4	chr19:49371884	1
LYSMD1	chr1:151138370	1
GP5	chr3:194119995	1
LOC100130950	chr17:5095378	1
TMEM132B	chr12:126106997	1
ZNF490	chr19:12721623	1
F3	chr1:95007413	1
PPP1R18	chr6:30655672	1
LINC01471	chr3:127256623	1
ATP5E	chr20:57607422	1
JUN	chr1:59249785	1
CA6	chr1:9005892	1
LOC100268168	chr5:172385778	1
E2F3	chr6:20403909	1
APP	chr21:27543138	1
STEAP3-AS1	chr2:120006647	1
UBC	chr12:125399587	1
MGC57346-CRHR1	chr17:43697694	1
PAK1	chr11:77185108	1
ADCY7	chr16:50321822	1
PRKRA	chr2:179315355	1
SLC33A1	chr3:155572248	1
MIR4740	chr17:79374578	1
ZNF718	chr4:56867	1
SMC3	chr10:112327448	1
ALDH3A2	chr17:19552063	1
SLC27A3	chr1:153747767	1
PRAMEF15	chr1:13421175	1
BOP1	chr8:145515120	1
SIPA1	chr11:65405577	1
FABP5	chr8:82192717	1
MEIS2	chr15:37393500	1
ENOSF1	chr18:712517	1
ZNF75A	chr16:3355405	1
ALCAM	chr3:105085556	1
KGFLP2	chr9:42019584	1
DNAJB8-AS1	chr3:128182436	1
TUBBP5	chr9:141044564	1
LINC01311	chr22:19159218	1
FGF6	chr12:4554780	1
RASSF5	chr1:206680862	1
BBS1	chr11:66278118	1
SULT1C2	chr2:108905094	1
CHI3L1	chr1:203155922	1
PICALM	chr11:85780139	1
DHX15	chr4:24586184	1
POM121L10P	chr22:25055114	1
LOC101928381	chr9:42771707	1
SPG11	chr15:44955876	1
PXMP2	chr12:133264191	1
FAM126B	chr2:201936392	1
PPIAL4C	chr1:144364246	1
PPP1R1B	chr17:37784750	1
MAP3K7CL	chr21:30464574	1
ASXL2	chr2:26101312	1
GC	chr4:72671237	1
RAD1	chr5:34915731	1
NFRKB	chr11:129765490	1
ZNF354C	chr5:178487606	1
HAGH	chr16:1877195	1
TMEM79	chr1:156254069	1
C17ORF64	chr17:58499864	1
MIR3652	chr12:104324202	1
KIT	chr4:55524094	1
CREB3	chr9:35732316	1
MED25	chr19:50321535	1
FDX1	chr11:110300660	1
ZNF593	chr1:26496387	1
FCGR3A	chr1:161520413	1
FAM122A	chr9:71394963	1
MVD	chr16:88729557	1
GCNT2	chr6:10585992	1
ICT1	chr17:73008758	1
IRS2	chr13:110438914	1
LUZP2	chr11:24518515	1
RPL17	chr18:47018834	1
ADCK2	chr7:140372952	1
SREBF2	chr22:42229082	1
ZNF780B	chr19:40562115	1
C1ORF86	chr1:2144159	1
TMEFF2	chr2:193059659	1
NLGN3	chrX:70364680	1
OR1N2	chr9:125315448	1
MIR6829	chr3:195609266	1
NUDT16	chr3:131100624	1
ARHGEF5	chr7:144052488	1
OR5T2	chr11:56000661	1
CCR4	chr3:32993065	1
GPC4	chrX:132549205	1
C14ORF178	chr14:78227172	1
SLC2A14	chr12:8025635	1
AASS	chr7:121784344	1
RBM45	chr2:178977150	1
TMED8	chr14:77843396	1
CMC2	chr16:81040502	1
UNC5C	chr4:96470361	1
SLC25A17	chr22:41215403	1
MCM7	chr7:99699563	1
CSMD2	chr1:34630875	1
UBQLN3	chr11:5531153	1
LOC101927419	chr10:103023307	1
MGAT4C	chr12:87232681	1
SYNCRIP	chr6:86352608	1
DPF1	chr19:38714890	1
PIGY	chr4:89444952	1
DNM2	chr19:10828728	1
POLE4	chr2:75185774	1
MIR4434	chr2:64752646	1
ZNF396	chr18:32957301	1
HTR1D	chr1:23521222	1
RC3H2	chr9:125667562	1
UBE2Z	chr17:46985730	1
ANKRD20A11P	chr21:15352765	1
MB21D2	chr3:192635950	1
TMEM123	chr11:102323775	1
TP53	chr17:7578811	1
MAP1LC3A	chr20:33134687	1
PPP6C	chr9:127952218	1
XAGE1B	chrX:52533094	1
SMIM5	chr17:73632674	1
PRPSAP2	chr17:18761380	1
SLC10A5	chr8:82607207	1
MORF4L2-AS1	chrX:102942211	1
ZNF782	chr9:99616389	1
PPIP5K2	chr5:102455957	1
GTF2I	chr7:74071990	1
DGKE	chr17:54911459	1
RPS6KA1	chr1:26872342	1
MRPS15	chr1:36930040	1
EIF4H	chr7:73588705	1
MAPK8IP3	chr16:1756220	1
TIMM23B	chr10:51371378	1
LINC01227	chr16:80603507	1
ERI3	chr1:44820951	1
SLCO5A1	chr8:70747299	1
PCAT7	chr9:97317326	1
GRIA4	chr11:105480799	1
MAN1B1-AS1	chr9:139981269	1
LOC102546294	chr5:147763413	1
CERS6	chr2:169312758	1
GPR68	chr14:91710852	1
CCDC63	chr12:111284763	1
MKRN1	chr7:140179369	1
KIAA1598	chr10:118886097	1
PMP22	chr17:15168674	1
MAP1LC3B2	chr12:116997185	1
ADM5	chr19:50191941	1
B4GALT5	chr20:48330421	1
ARMCX4	chrX:100673250	1
OBP2B	chr9:136084637	1
CYFIP2	chr5:156693089	1
PDE4A	chr19:10531332	1
CYP1B1	chr2:38303323	1
BRWD1	chr21:40685712	1
C9	chr5:39364655	1
CERS4	chr19:8274216	1
CACTIN-AS1	chr19:3607244	1
DHCR24	chr1:55352921	1
LOC149950	chr20:31175280	1
HMG20B	chr19:3572942	1
SNHG4	chr5:138609440	1
SSH2	chr17:28088450	1
KCTD15	chr19:34287750	1
CDH13	chr16:82660398	1
ADGRA1-AS1	chr10:134900201	1
GPX7	chr1:53068042	1
PHACTR3	chr20:58203663	1
SLC44A2	chr19:10713120	1
CCL4L2	chr17:34538464	1
HPS6	chr10:103825123	1
SH3GL1P2	chr17:28951335	1
LOC339666	chr22:32772650	1
ATF3	chr1:212781969	1
DPRXP4	chr17:29302352	1
APOC3	chr11:116700623	1
PCMT1	chr6:150070830	1
EVC2	chr4:5710294	1
GAGE7	chrX:49216677	1
MIR1237	chr11:64136073	1
ARRDC1-AS1	chr9:140512981	1
MEF2A	chr15:100106132	1
SPOPL	chr2:139259349	1
MORN1	chr1:2323190	1
CCNG2	chr4:78078356	1
SPAM1	chr7:123565908	1
PPP2R1B	chr11:111637169	1
CNN3	chr1:95391364	1
PRSS35	chr6:84222193	1
LINC00963	chr9:132250938	1
MPC1	chr6:166796501	1
LUNAR1	chr15:99557932	1
LOC101927497	chr7:92465796	1
COG2	chr1:230778201	1
AOC3	chr17:41005259	1
LRIG3	chr12:59313327	1
GSTO2	chr10:106028630	1
LYST	chr1:236047008	1
SLC16A9	chr10:61469649	1
SYNRG	chr17:35969486	1
GDAP1	chr8:75262617	1
LINC01160	chr1:112150940	1
CCDC86	chr11:60609428	1
[truncated: 24,284 more rows]
