# Supplementary material for: Modulation of macrophage inflammatory function through selective inhibition of the epigenetic reader protein SP140
Source: BMC Biol. 2022 Aug 19;20:182. doi: 10.1186/s12915-022-01380-6 (PMC9392322; doi:10.1186/s12915-022-01380-6)
Supplement: Supplementary file 13 — Additional file 13: Table S13. The normalized read count for ChIP-seq (GSK761-pretreated “M1” macrophages stimulated with 4h LPS (100 ng/mL)). [file 12915_2022_1380_MOESM13_ESM.xlsx]

## Sheet: Sheet1
#H:hugo	tss_for_gene	The normalized read count
MIR3687-2	chr21:9826202	274.333
MIR3687-1	chr21:9826202	274.333
MIR3648-2	chr21:9825831	144.667
MIR3648-1	chr21:9825831	144.667
MIR663A	chr20:26188914	52
MIR6087	chrX:108297771	40.6667
FLOT1	chr6:30710453	27
ROCK1P1	chr18:109064	24.3333
MIR8078	chr18:112339	20.3333
MIR7641-2	chr1:228746094	19
DUSP5P1	chr1:228780656	17
RHOU	chr1:228780393	14
CEBPB-AS1	chr20:48808606	13.3333
FTL	chr19:49468565	13
MIR4530	chr19:39900318	13
SLC35B2	chr6:44225089	12
HIVEP1	chr6:12012723	11
SCO2	chr22:50964574	11
NFKBIA	chr14:35873960	9
B2M	chr15:45003684	8.66667
IRF1	chr5:131826465	8
MLLT6	chr17:36861872	7.66667
BZRAP1	chr17:56406152	7.66667
TCEB3CL	chr18:44544371	7.33333
PF4	chr4:74847841	7.33333
SNAR-A10	chr19:50610391	7
SNAR-A7	chr19:50610391	7
SNAR-A3	chr19:50610391	7
SNAR-A4	chr19:50610391	7
SNAR-A5	chr19:50610391	7
SNAR-A14	chr19:50610391	7
SNAR-A8	chr19:50610391	7
SNAR-A6	chr19:50610391	7
SNAR-A11	chr19:50610391	7
DAPK1	chr9:90113449	7
SLC7A5P2	chr16:21531765	7
SNAR-A9	chr19:50610391	7
CDKN1A	chr6:36646486	6.66667
ZNF580	chr19:56152391	6.66667
REXO1L2P	chr8:86727072	6.66667
BZRAP1-AS1	chr17:56406298	6.66667
MARCKS	chr6:114178513	6.66667
FBXO39	chr17:6679551	6.33333
PABPC1L	chr20:43538702	6.33333
SNAR-A1	chr19:48421685	6
MIR6821	chr22:50356513	6
BID	chr22:18256808	6
SNAR-A2	chr19:48421685	6
LGALS3	chr14:55595934	6
PYGO2	chr1:154934258	5.66667
SNX16	chr8:82754521	5.66667
NFE2L2	chr2:178128617	5.66667
NOTCH2	chr1:120612317	5.66667
ATXN2L	chr16:28834368	5.66667
CFLAR	chr2:201980876	5.66667
C7ORF49	chr7:134855276	5.66667
TIPARP	chr3:156392714	5.5
PSMB8	chr6:32812712	5.33333
RNVU1-19	chr1:147994145	5.33333
FLJ36000	chr17:21904061	5.33333
B4GALT1-AS1	chr9:33166945	5.33333
LOC100130476	chr6:138189370	5.33333
C19ORF24	chr19:1275519	5.33333
UCKL1	chr20:62587800	5
MIR4477A	chr9:68415388	5
ZNF34	chr8:146012730	5
BAZ1B	chr7:72936615	5
MIR6732	chr1:37945830	5
NOTCH2NL	chr1:145209112	5
PLEKHO1	chr1:150122775	5
HS3ST3B1	chr17:14204366	5
SNAR-C3	chr19:48453552	5
MIR6892	chr7:143079778	4.66667
IL10RB	chr21:34638664	4.66667
TCEB3C	chr18:44556449	4.66667
LITAF	chr16:11680806	4.66667
TKFC	chr11:61100653	4.66667
TYMP	chr22:50968514	4.66667
RUFY3	chr4:71570653	4.66667
GLUL	chr1:182360539	4.66667
CDH23	chr10:73571639	4.66667
PTGER4	chr5:40680031	4.66667
SEC11A	chr15:85259691	4.5
SYK	chr9:93564208	4.5
LINC00936	chr12:90102731	4.33333
2007-03-01	chr2:160568967	4.33333
SLC16A6	chr17:66287405	4.33333
CTSB	chr8:11725646	4.33333
KLF13	chr15:31619057	4.33333
CPEB2	chr4:15004297	4.33333
SGPP2	chr2:223289321	4.33333
BHLHE40-AS1	chr3:5021646	4.33333
UBE2D4	chr7:43966034	4.33333
CCL2	chr17:32582295	4.33333
RORA	chr15:61521502	4.33333
ZC3H12A	chr1:37940118	4.33333
TNFAIP2	chr14:103592663	4.33333
SGK1	chr6:134496034	4.33333
TUBB	chr6:30689325	4.33333
JHDM1D-AS1	chr7:139877060	4.33333
FTH1	chr11:61735132	4.33333
MIR663AHG	chr20:26189869	4.33333
URGCP	chr7:43966010	4
LOC102723376	chr18:12074	4
ARHGAP31-AS1	chr3:119041607	4
ZFP36	chr19:39897486	4
TIMM22	chr17:900356	4
NEAT1	chr11:65190268	4
ATF3	chr1:212781969	4
TMBIM4	chr12:66563852	4
JUNB	chr19:12902309	4
VRK2	chr2:58273846	4
MIR4750	chr19:50391431	4
ACTR3	chr2:114648174	4
CHMP5	chr9:33264876	4
VPS37C	chr11:60928916	4
BET1L	chr11:207422	4
LINC00960	chr3:75721541	4
TSPY26P	chr20:30778163	4
SIRT7	chr17:79876058	4
LACC1	chr13:44453968	4
DNAJC9-AS1	chr10:75007124	4
RPIA	chr2:88991175	4
RELT	chr11:73087712	4
SPG20	chr13:36920646	4
PDE4DIP	chr1:144995033	4
NCF1B	chr7:72634673	4
SLC2A6	chr9:136344276	4
RBM47	chr4:40631883	4
LOC100289511	chr14:70234430	4
CXCL16	chr17:4643223	4
CTSC	chr11:88070941	4
RASA4B	chr7:102257203	3.66667
DNAJC9	chr10:75007089	3.66667
PTGER2	chr14:52781015	3.66667
WASH7P	chr1:29370	3.66667
ANKRD37	chr4:186317839	3.66667
GPCPD1	chr20:5591672	3.66667
DRAP1	chr11:65686727	3.66667
TOPORS-AS1	chr9:32552231	3.66667
PIK3AP1	chr10:98480279	3.66667
GNA13	chr17:63052920	3.66667
RNU6ATAC	chr9:137029686	3.66667
TUG1	chr22:31365196	3.66667
SMIM19	chr8:42396938	3.66667
RASA4	chr7:102257205	3.66667
SNAR-C2	chr19:48416307	3.66667
CDK8	chr13:26828755	3.66667
CDCA4	chr14:105487425	3.66667
COMMD5	chr8:146078452	3.66667
SNAR-C5	chr19:48416307	3.66667
GSAP	chr7:77045717	3.66667
PLEC	chr8:145050913	3.66667
SNAR-C1	chr19:48416307	3.66667
CD74	chr5:149792499	3.66667
NKIRAS2	chr17:40172086	3.66667
ANP32A	chr15:69113261	3.66667
PLAU	chr10:75670861	3.66667
MLNR	chr13:49794473	3.66667
DNAJB11	chr3:186288464	3.5
UBIAD1	chr1:11333254	3.5
MESDC1	chr15:81293294	3.5
DDB1	chr11:61100684	3.33333
GPX4	chr19:1104648	3.33333
EPN1	chr19:56186560	3.33333
USF2	chr19:35759895	3.33333
STAG2	chrX:123094409	3.33333
RNF19B	chr1:33430414	3.33333
CSAG4	chrX:151903136	3.33333
LINC01137	chr1:37940044	3.33333
SMIM15	chr5:60458302	3.33333
BAZ2B	chr2:160568946	3.33333
GABPB1	chr15:50647605	3.33333
WTAP	chr6:160148531	3.33333
SNAR-B2	chr19:50637121	3.33333
TMSB4X	chrX:12993225	3.33333
CD83	chr6:14117864	3.33333
RRN3P3	chr16:22449036	3.33333
RAD23A	chr19:13056627	3.33333
PIK3R5	chr17:8869029	3.33333
CREB3	chr9:35732316	3.33333
HIF1A-AS1	chr14:62162541	3.33333
CCL3L3	chr17:34524147	3.33333
HEIH	chr5:180258618	3.33333
SNAR-B1	chr19:50637121	3.33333
MEGF11	chr15:66546075	3.33333
ODF3B	chr22:50971008	3.33333
METTL23	chr17:74722911	3.33333
SNAR-C4	chr19:48442797	3.33333
SCFD1	chr14:31091524	3.33333
PBX2	chr6:32157963	3.33333
LINC01123	chr2:110744556	3.33333
KDM7A	chr7:139876741	3.33333
ACTB	chr7:5570232	3.33333
MIR3190	chr19:47730198	3.33333
TAF10	chr11:6633475	3.33333
CUL2	chr10:35379311	3.33333
KISS1R	chr19:917341	3
FZR1	chr19:3522953	3
IRF2BP2	chr1:234745271	3
RRP36	chr6:42989384	3
ARHGEF18	chr19:7459998	3
MIR3187	chr19:813583	3
PKMYT1	chr16:3030540	3
SCAMP1-AS1	chr5:77656365	3
UGT2B4	chr4:70391732	3
MTSS1L	chr16:70719954	3
WEE1	chr11:9595227	3
TIPARP-AS1	chr3:156393502	3
SIRPA	chr20:1875825	3
FCER1G	chr1:161185086	3
NR3C1	chr5:142784045	3
CCL3	chr17:34417506	3
MAPKAPK2	chr1:206858364	3
UBE2L6	chr11:57335803	3
STK10	chr5:171615346	3
CCL3L1	chr17:34524157	3
LINC01106	chr2:111142113	3
HIRA	chr22:19419219	3
LOC100133985	chr2:70352448	3
HNRNPF	chr10:43892794	3
ATP6V1H	chr8:54755602	3
CTDSP1	chr2:219264477	3
IER3	chr6:30712327	3
TXNL4A	chr18:77793935	3
MIR4745	chr19:804939	3
SNORD116-3	chr15:25302005	3
RHOT2	chr16:718082	3
LPIN1	chr2:11886721	3
DTX3	chr12:57998404	3
REPIN1	chr7:150065878	3
USP24	chr1:55681039	3
LINC01465	chr12:62997214	3
PPP3CC	chr8:22298482	3
SUV420H1	chr11:67981239	3
JAK2	chr9:4985244	3
PAFAH1B1	chr17:2496922	3
RNF225	chr19:58907456	3
CASC2	chr10:119806331	3
PABPC1	chr8:101734315	3
DAPK3	chr19:3971121	3
LOC101927243	chr7:77044514	3
MIR6882	chr15:75133048	3
CD68	chr17:7482805	3
BRD2	chr6:32939371	3
ANO8	chr19:17445638	3
LOC286059	chr8:22925741	3
SNORD116-9	chr15:25302005	3
SIAH1	chr16:48419229	3
TRIM7	chr5:180631340	3
DOK3	chr5:176937427	3
BACH1	chr21:30671736	3
CCDC97	chr19:41816093	3
ZNF239	chr10:44070065	3
FERMT3	chr11:63974151	3
PDE1B	chr12:54943176	3
PDXK	chr21:45138977	3
MORC3	chr21:37692486	3
CCDC154	chr16:1494490	3
LATS2	chr13:21635722	3
TMEM8C	chr9:136390068	3
PLAGL2	chr20:30795546	3
CCL4	chr17:34431219	3
PCBD2	chr5:134240809	3
LOC102723854	chr2:43266682	3
ARSG	chr17:66287635	3
NOTUM	chr17:79919057	3
KCNAB2	chr1:6106173	3
EIF4A1	chr17:7476023	3
CHST15	chr10:125853123	2.66667
HEATR5A	chr14:31889788	2.66667
CREB1	chr2:208394615	2.66667
SORBS3	chr8:22423178	2.66667
ZNF804A	chr2:185463092	2.66667
THUMPD3-AS1	chr3:9439174	2.66667
ACBD5	chr10:27529808	2.66667
MIR1538	chr16:69599771	2.66667
2006-03-01	chr5:10353750	2.66667
HEBP1	chr12:13153243	2.66667
MIR6891	chr6:31323093	2.66667
YTHDF2	chr1:29063451	2.66667
NUP153	chr6:17707065	2.66667
TNNI2	chr11:1860232	2.66667
AMDHD2	chr16:2570362	2.66667
SCAMP1	chr5:77656326	2.66667
EIF4G2	chr11:10829543	2.66667
SPG20-AS1	chr13:36920567	2.66667
KIAA1033	chr12:105501491	2.66667
POLR2J4	chr7:44058793	2.66667
LOC256880	chr4:100871650	2.66667
RNU11	chr1:28975111	2.66667
ADO	chr10:64564515	2.66667
HIST1H2AI	chr6:27775976	2.66667
THAP7	chr22:21356404	2.66667
USP12-AS2	chr13:27746395	2.66667
MIR4477B	chr9:68415307	2.66667
MLH3	chr14:75518235	2.66667
CRACR2A	chr12:3862366	2.66667
TRAM1	chr8:71520694	2.66667
MPDU1	chr17:7486964	2.66667
DMXL2	chr15:51914967	2.66667
ZYX	chr7:143078359	2.66667
MIR6723	chr1:567793	2.66667
KDM3B	chr5:137688284	2.66667
PPP4R1-AS1	chr18:9614804	2.66667
JMJD6	chr17:74722881	2.66667
USP3	chr15:63796709	2.66667
ANXA2	chr15:60690185	2.66667
RASGEF1B	chr4:82393082	2.66667
LOC100996583	chr1:2497973	2.66667
AZIN1	chr8:103876428	2.66667
GCHFR	chr15:41056284	2.66667
ULK3	chr15:75135552	2.66667
CYP26A1	chr10:94833646	2.66667
YME1L1	chr10:27443349	2.66667
ATP1A1	chr1:116916488	2.66667
SRC	chr20:35974530	2.66667
BBS5	chr2:170336005	2.66667
PCSK7	chr11:117103241	2.66667
WARS	chr14:100841927	2.66667
SERPINF2	chr17:1646319	2.66667
LOC645166	chr1:148930404	2.66667
SNRPB	chr20:2451499	2.66667
IRF8	chr16:85932773	2.66667
SLC2A9	chr4:10023114	2.66667
TFE3	chrX:48901043	2.66667
PSMB8-AS1	chr6:32811862	2.66667
MAGEA12	chrX:151903101	2.66667
NRD1	chr1:52344609	2.66667
PRICKLE3	chrX:49042776	2.66667
MASTL	chr10:27443752	2.66667
LOC102724279	chr19:15975714	2.66667
HNRNPL	chr19:39340617	2.66667
ETV7	chr6:36355568	2.66667
KMT2E-AS1	chr7:104654588	2.66667
RB1	chr13:48877882	2.66667
LINC01001	chr11:131920	2.66667
ATP1B1	chr1:169075946	2.66667
KIAA1524	chr3:108308491	2.5
HIST1H2BN	chr6:27806439	2.5
NDUFV3	chr21:44313377	2.5
NRROS	chr3:196366566	2.5
ZNF276	chr16:89787951	2.5
PRR7	chr5:176873795	2.5
EIF2D	chr1:206785904	2.5
RASSF5	chr1:206680862	2.5
PANX1	chr11:93862093	2.5
ERG	chr21:40032591	2.5
PPM1A	chr14:60715965	2.5
ZBED1	chrX:2418580	2.5
RARRES1	chr3:158450275	2.5
NCOA7	chr6:126111908	2.5
HIATL1	chr9:97136832	2.5
SLC30A1	chr1:211752099	2.5
ZNF529	chr19:37096178	2.5
APC2	chr19:1450147	2.5
LTBP4	chr19:41103140	2.33333
RNF139	chr8:125487007	2.33333
NINJ1	chr9:95896570	2.33333
SLX1B	chr16:30205163	2.33333
PCBP1-AS1	chr2:70314147	2.33333
RPS15A	chr16:18801656	2.33333
RHBDF2	chr17:74497509	2.33333
CAHM	chr6:163834982	2.33333
STAT1	chr2:191878976	2.33333
LMNTD1	chr12:25801496	2.33333
DENND4B	chr1:153919154	2.33333
MIR937	chr8:144895212	2.33333
DRAM1	chr12:102271104	2.33333
MIRLET7I	chr12:62997465	2.33333
PFN1	chr17:4852381	2.33333
LINC00886	chr3:156534851	2.33333
MIR3193	chr20:30194988	2.33333
VIM-AS1	chr10:17271984	2.33333
STAT5A	chr17:40439564	2.33333
PHPT1	chr9:139743267	2.33333
NADK	chr1:1690081	2.33333
USP30	chr12:109490374	2.33333
SF1	chr11:64545938	2.33333
ICAM4	chr19:10397642	2.33333
HNF4A	chr20:43029895	2.33333
INAFM1	chr19:47777658	2.33333
TRAP1	chr16:3767598	2.33333
MRPL53	chr2:74699942	2.33333
UBC	chr12:125399587	2.33333
INTS6	chr13:52027275	2.33333
LOC100507634	chr1:55681080	2.33333
YPEL3	chr16:30107521	2.33333
CD81-AS1	chr11:2399222	2.33333
ZSCAN16-AS1	chr6:28105094	2.33333
SNORA38	chr6:31590855	2.33333
TMEM138	chr11:61129472	2.33333
SLC9A8	chr20:48429249	2.33333
FOXC2-AS1	chr16:86601367	2.33333
SLX1A	chr16:30205163	2.33333
LOC103091866	chr1:149576261	2.33333
TAP2	chr6:32806547	2.33333
RASA1	chr5:86564069	2.33333
C15ORF39	chr15:75494220	2.33333
SARAF	chr8:29940724	2.33333
SAT1	chrX:23801274	2.33333
ZPBP2	chr17:38024454	2.33333
GABPA	chr21:27107328	2.33333
MIR636	chr17:74732630	2.33333
MIR6848	chr8:145540978	2.33333
SMAD5	chr5:135468533	2.33333
MFSD11	chr17:74732646	2.33333
YWHAZ	chr8:101963560	2.33333
DSE	chr6:116692109	2.33333
MSH4	chr1:76262555	2.33333
ADAMTS15	chr11:130318868	2.33333
TUBA1C	chr12:49658781	2.33333
CELF6	chr15:72612287	2.33333
FER1L4	chr20:34195484	2.33333
KXD1	chr19:18668571	2.33333
FAM168B	chr2:131851004	2.33333
TTLL3	chr3:9851643	2.33333
CCND2	chr12:4382901	2.33333
TRIB2	chr2:12856997	2.33333
LOC101927100	chr5:114937851	2.33333
FGR	chr1:27961727	2.33333
SMA5	chr5:69881549	2.33333
RMND5A	chr2:86947413	2.33333
LOC100130705	chr7:128506463	2.33333
TFEB	chr6:41702139	2.33333
ZNF821	chr16:71917444	2.33333
PHF11	chr13:50070527	2.33333
FAM174B	chr15:93199031	2.33333
HNRNPCL2	chr1:13184326	2.33333
LINC00311	chr16:85316563	2.33333
PSTPIP2	chr18:43652250	2.33333
KLF7	chr2:208031580	2.33333
MIR142	chr17:56408679	2.33333
MIR7976	chr3:127306019	2.33333
PLEKHM1P	chr17:62833302	2.33333
USP17L19	chr4:9255103	2.33333
BOD1L1	chr4:13629328	2.33333
LOC414300	chr12:105501420	2.33333
MANBA	chr4:103682151	2.33333
HM13-AS1	chr20:30161066	2.33333
HLA-DPA1	chr6:33048555	2.33333
MOB1A	chr2:74405995	2.33333
SLC39A6	chr18:33709357	2.33333
NAPRT	chr8:144660521	2
MIER1	chr1:67395925	2
SUGCT	chr7:40174574	2
PTP4A2	chr1:32403988	2
GFI1	chr1:92951628	2
IFITM10	chr11:1771824	2
TBC1D3B	chr17:34808092	2
LBX1-AS1	chr10:102989350	2
FAM138F	chr19:77690	2
ALAS1	chr3:52232098	2
USP15	chr12:62654120	2
LOC100996255	chr15:32828959	2
HIST1H2AJ	chr6:27782518	2
ZNF865	chr19:56124958	2
BHLHE40	chr3:5021096	2
NOL7	chr6:13615558	2
MBP	chr18:74844774	2
MIR6770-1	chr16:18473267	2
NEK9	chr14:75593778	2
C1ORF159	chr1:1051736	2
AGBL2	chr11:47736928	2
SFXN5	chr2:73298965	2
KAZN	chr1:15250624	2
DOCK8	chr9:214864	2
ZFP37	chr9:115819071	2
SNORA40	chr11:93468402	2
MTF1	chr1:38325292	2
CAPG	chr2:85637820	2
MIR7845	chr2:208031123	2
SNORD5	chr11:93466466	2
EGR3	chr8:22549902	2
LOC100507373	chr19:14247963	2
FOSL2	chr2:28615778	2
OSCAR	chr19:54605994	2
USP17L29	chr4:9331636	2
HSPA9	chr5:137911318	2
AADACL2-AS1	chr3:151645963	2
SPACA4	chr19:49109999	2
MIR3064	chr17:62496957	2
MIR6859-4	chr15:102513726	2
RIT1	chr1:155881193	2
PRR7-AS1	chr5:176874945	2
ZFHX3	chr16:73082274	2
MPG	chr16:128168	2
PAIP1	chr5:43557195	2
CDK11A	chr1:1655791	2
STK40	chr1:36851528	2
MMP23B	chr1:1567559	2
CHAMP1	chr13:115079964	2
HNRNPD	chr4:83295149	2
RNU86	chr22:39712901	2
INSM1	chr20:20348764	2
LINC00476	chr9:98638259	2
SPI1	chr11:47400127	2
LOC101927583	chr12:58015686	2
SART1	chr11:65729159	2
GUSB	chr7:65447301	2
LOC100272216	chr5:68929028	2
GRINA	chr8:145064225	2
TRPV3	chr17:3461289	2
PCBP2	chr12:53845885	2
FAM222A	chr12:110152186	2
HSD17B6	chr12:57157001	2
NBN	chr8:90996899	2
CALML4	chr15:68498448	2
LINC01424	chr21:46222155	2
YY1	chr14:100705101	2
RRBP1	chr20:17662928	2
CSNK1A1	chr5:148931115	2
LOC100128531	chr22:25508659	2
DNM1P46	chr15:100347132	2
ADPRH	chr3:119298279	2
GAGE2A	chrX:49354117	2
SLC1A4	chr2:65216494	2
CACNG3	chr16:24266873	2
GOLGA8O	chr15:32747835	2
SNORD104	chr17:62223437	2
TIMM21	chr18:71815745	2
C17ORF49	chr17:6918055	2
FANK1	chr10:127585107	2
UNC45A	chr15:91478214	2
USP17L28	chr4:9331636	2
MIR6859-3	chr15:102513726	2
HIST1H1E	chr6:26156558	2
FAM138A	chr19:77690	2
SAMM50	chr22:44351260	2
PTPRH	chr19:55720874	2
SDHD	chr11:111957547	2
FIS1	chr7:100888371	2
GCH1	chr14:55369542	2
SLC37A1	chr21:43919741	2
ARHGAP10	chr4:148653452	2
NDUFV2	chr18:9102627	2
CDON	chr11:125933187	2
DBI	chr2:120124623	2
MAP3K4	chr6:161412758	2
IQCJ-SCHIP1-AS1	chr3:159486401	2
FAM47E	chr4:77135192	2
P2RY11	chr19:10222196	2
RHBDD1	chr2:227700670	2
LOC101929297	chr6:166650456	2
FAM27B	chr9:67794189	2
USP17L30	chr4:9331636	2
PPTC7	chr12:111021064	2
SNX31	chr8:101661893	2
NAA20	chr20:19997933	2
COX20	chr1:244998638	2
CACUL1	chr10:120514758	2
CBWD5	chr9:70490211	2
SIGMAR1	chr9:34637823	2
ZNF335	chr20:44600833	2
ACE	chr17:61554421	2
LOC102724508	chr17:45400979	2
KDM4C	chr9:6757640	2
KMT2A	chr11:118307204	2
KLF15	chr3:126076236	2
CDV3	chr3:133293277	2
GALNT11	chr7:151722758	2
TBC1D2	chr9:101018003	2
TLN1	chr9:35732392	2
MITF	chr3:69788585	2
KCNA1	chr12:5019072	2
ZNF75A	chr16:3355405	2
RPLP1	chr15:69745158	2
ALCAM	chr3:105085556	2
ACOT7	chr1:6453826	2
GGA1	chr22:38005046	2
NAV2-AS2	chr11:20070849	2
SHISA8	chr22:42310671	2
SLC31A2	chr9:115913237	2
UTP18	chr17:49337896	2
MIR6125	chr12:62654139	2
ENO1	chr1:8939151	2
MAPK8IP3	chr16:1756220	2
GPX1	chr3:49395791	2
CLASRP	chr19:45542297	2
PDE4A	chr19:10543110	2
PPIP5K1	chr15:43877090	2
LOC284454	chr19:13947103	2
DDX11L1	chr1:11873	2
MPPE1	chr18:11908796	2
APEH	chr3:49711434	2
SGCB	chr4:52904485	2
CNN3	chr1:95392779	2
MIR6770-2	chr16:18473267	2
EEF1A1	chr6:74230755	2
MOXD1	chr6:132722673	2
ACAD9	chr3:128598332	2
USP17L26	chr4:9331636	2
IRF5	chr7:128578270	2
FLJ32255	chr5:42993435	2
TUBGCP6	chr22:50683400	2
SCAF11	chr12:46384401	2
NCOA4	chr10:51576284	2
FCHO2	chr5:72251807	2
OSBPL5	chr11:3186582	2
SOD2	chr6:160114353	2
CMPK2	chr2:7006766	2
MTMR14	chr3:9691116	2
ZNHIT2	chr11:64885210	2
AHRR	chr5:304290	2
NCF1	chr7:74188308	2
NFAT5	chr16:69599868	2
CMKLR1	chr12:108733094	2
KCNK7	chr11:65363467	2
UNKL	chr16:1429684	2
MRPL14	chr6:44095191	2
TNIP1	chr5:150460645	2
CCDC85C	chr14:100070727	2
ODC1	chr2:10587925	2
C7ORF43	chr7:99756344	2
MIR6859-2	chr15:102513726	2
ARPC5L	chr9:127631483	2
PTDSS2	chr11:450279	2
RPS16	chr19:39926618	2
USP17L27	chr4:9331636	2
RBAK	chr7:5085552	2
TMEM206	chr1:212588243	2
CBFA2T3	chr16:89007608	2
YBX2	chr17:7197876	2
RNF103	chr2:86851000	2
MADD	chr11:47291670	2
NUDT3	chr6:34360457	2
MAPK6	chr15:52311410	2
FAM27C	chr9:44990235	2
SLC25A6	chrX:1511039	2
EDEM1	chr3:5229358	2
KCTD19	chr16:67360661	2
USP17L5	chr4:9331636	2
LOC344967	chr4:40058819	2
HLA-DRB1	chr6:32557613	2
ZFP69	chr1:40943301	2
DCTD	chr4:183838630	2
FOXD3-AS1	chr1:63789346	2
TNR	chr1:175712752	2
GARS	chr7:30634180	2
MIR663B	chr2:133014653	2
CPNE5	chr6:36807220	2
ZMYND15	chr17:4643309	2
PDIA3	chr15:44038589	2
USP17L25	chr4:9331636	2
ZNF7	chr8:146052902	2
DZANK1	chr20:18447829	2
NFKBIZ	chr3:101568357	2
NUP50-AS1	chr22:45548465	2
SLC43A2	chr17:1508328	2
LINC00910	chr17:41466266	2
USP12	chr13:27746033	2
PTGR2	chr14:74318620	2
LOC104968399	chr18:3262357	2
DCAF17	chr2:172290760	2
CKAP4	chr12:106641713	2
DSG2	chr18:29078026	2
TLL2	chr10:98273683	2
LOC115110	chr1:2488450	2
SPEN	chr1:16174358	2
ATF5	chr19:50432399	2
SEMA3B	chr3:50310549	2
ADSSL1	chr14:105190533	2
TMEM210	chr9:140066498	2
MIR6770-3	chr16:18473267	2
PXDC1	chr6:3752246	2
RNASE11	chr14:21058417	2
FAM71B	chr5:156593279	2
CDCP1	chr3:45187914	2
RANBP2	chr2:109335936	2
RNF128	chrX:105969893	2
SLC35F4	chr14:58332592	2
KRTCAP2	chr1:155145804	2
XK	chrX:37545132	2
HTR7P1	chr12:13153375	2
RNF166	chr16:88772800	2
USP32	chr17:58469586	2
LOC100128176	chr6:149285820	2
PILRA	chr7:99971067	2
C9ORF91	chr9:117373705	2
TJP3	chr19:3721696	2
GGN	chr19:38878668	2
PRSS30P	chr16:2892752	2
TNFAIP3	chr6:138188324	2
MAPK1IP1L	chr14:55518361	2
RPL15	chr3:23958652	2
BTBD11	chr12:107712196	2
WASH5P	chr19:70966	2
LRRCC1	chr8:86019322	2
TMEM243	chr7:86849031	2
PLEKHF1	chr19:30156326	2
BOLA3	chr2:74375039	2
ADSS	chr1:244615436	2
HMGCS1	chr5:43313614	2
FAM13B	chr5:137368802	2
LOC101929089	chr11:118401490	2
ST6GALNAC5	chr1:77333185	2
MIR635	chr17:66420689	2
ZNF382	chr19:37096206	2
TRIM65	chr17:73893084	2
RPL30	chr8:99057818	2
DALRD3	chr3:49058504	2
NEK11	chr3:130745693	2
ZBTB37	chr1:173837492	2
SEMA5B	chr3:122746659	2
LSP1	chr11:1874199	2
MIR4707	chr14:23426238	2
PSMA7	chr20:60718514	2
XBP1	chr22:29196560	2
ACBD4	chr17:43213013	2
PIGW	chr17:34891402	2
NR1I2	chr3:119501556	2
UHRF1	chr19:4910378	2
CSRNP2	chr12:51477437	2
EVA1C	chr21:33784744	2
PATL1	chr11:59436511	2
S100A9	chr1:153330329	2
MIR3183	chr17:925799	2
FAM76B	chr11:95522954	2
FAM213B	chr1:2518188	2
MIR3198-1	chr22:18247025	2
ASTE1	chr3:130745698	2
USP17L24	chr4:9331636	2
CORO1C	chr12:109124619	2
TMEM229A	chr7:123673523	2
SPSB2	chr12:6982449	2
PAX2	chr10:102495465	2
SCARF2	chr22:20792146	2
SRRM1	chr1:24969593	2
WDR45B	chr17:80606411	2
SERPINB8	chr18:61637262	2
TCEB3CL2	chr18:44550534	2
HSP90AB1	chr6:44214694	2
NPLOC4	chr17:79544459	2
TMEM200B	chr1:29449013	2
TGIF1	chr18:3449648	2
ZFAND5	chr9:74979508	2
ADPGK	chr15:73076126	2
TFDP3	chrX:132352376	2
CMIP	chr16:81478774	2
WDR1	chr4:10118573	2
TSC22D3	chrX:106959711	2
ATP7A	chrX:77166152	2
MIR6859-1	chr15:102513726	2
FOXO6	chr1:41827602	2
PFN2	chr3:149688741	2
SH3KBP1	chrX:19905744	2
KLHL35	chr11:75141674	2
LOC102724297	chr3:46448550	2
PPIA	chr7:44836234	2
S100A6	chr1:153508717	2
SMYD2	chr1:214454564	2
TMPRSS2	chr21:42879992	2
NANOS2	chr19:46418036	2
MGME1	chr20:17949761	2
MICB	chr6:31462657	2
JARID2	chr6:15249085	2
DEPTOR	chr8:120885894	2
TMEM254	chr10:81839000	2
ARHGAP40	chr20:37230576	2
TRIM8	chr10:104404251	2
PSMB9	chr6:32821937	2
MIR564	chr3:44903379	1.66667
STK17A	chr7:43622691	1.66667
ZFYVE9	chr1:52607765	1.66667
USP38	chr4:144106069	1.66667
HIST2H3A	chr1:149824180	1.66667
KRTCAP3	chr2:27665232	1.66667
NDRG1	chr8:134309547	1.66667
LDHAL6B	chr15:59499014	1.66667
UPF2	chr10:12084840	1.66667
ZNF783	chr7:148959261	1.66667
MIR6754	chr11:71184548	1.66667
MIR23A	chr19:13947473	1.66667
TMPO	chr12:98909350	1.66667
SATB2	chr2:200322819	1.66667
PELI1	chr2:64371605	1.66667
TBC1D3F	chr17:34808060	1.66667
LGMN	chr14:93215047	1.66667
GSX1	chr13:28366779	1.66667
AKT1S1	chr19:50381613	1.66667
NUTM2A-AS1	chr10:89102315	1.66667
MMP25-AS1	chr16:3109371	1.66667
CPEB2-AS1	chr4:15003669	1.66667
MBD5	chr2:148778579	1.66667
CMYA5	chr5:78985658	1.66667
SPIDR	chr8:48173469	1.66667
UBE2D3	chr4:103748340	1.66667
SRRT	chr7:100472700	1.66667
ZFAND6	chr15:80352501	1.66667
MID1IP1-AS1	chrX:38663136	1.66667
LOC389895	chrX:139173825	1.66667
RAB24	chr5:176730745	1.66667
TTC36	chr11:118398209	1.66667
OSBPL9	chr1:52195485	1.66667
FAM138C	chr9:35864	1.66667
ZKSCAN2	chr16:25268855	1.66667
LYRM1	chr16:20911619	1.66667
LINC00623	chr1:149576466	1.66667
GEMIN8	chrX:14048035	1.66667
THOC1	chr18:268059	1.66667
NDUFV2-AS1	chr18:9136718	1.66667
PMS2P1	chr7:99933930	1.66667
LOC100131564	chr1:93811368	1.66667
RARA	chr17:38498270	1.66667
LINC00933	chr15:85113879	1.66667
SLC16A3	chr17:80190107	1.66667
HMGA1	chr6:34204649	1.66667
IL15RA	chr10:6019574	1.66667
LINC00869	chr1:144341077	1.66667
SNORD89	chr2:101889511	1.66667
SOCS5	chr2:46926348	1.66667
NSFP1	chr17:44668099	1.66667
PTPN12	chr7:77166772	1.66667
MIR4521	chr17:8090262	1.66667
RNF138	chr18:29671817	1.66667
GAGE12I	chrX:49325506	1.66667
LINC00909	chr18:72265071	1.66667
LOC100268168	chr5:172385778	1.66667
NADK2	chr5:36242381	1.66667
TBC1D8	chr2:101767846	1.66667
USMG5	chr10:105156270	1.66667
LOC101929372	chr22:18071958	1.66667
KCNIP1	chr5:169931039	1.66667
MIR612	chr11:65211928	1.66667
TMEM68	chr8:56685966	1.66667
TMED8	chr14:77843396	1.66667
CSMD2	chr1:34630875	1.66667
SMG1P3	chr16:21513602	1.66667
SYNCRIP	chr6:86352608	1.66667
AKAP11	chr13:42846288	1.66667
ASB3	chr2:54013985	1.66667
MC1R	chr16:89984286	1.66667
MIR8075	chr13:113917233	1.66667
SPAG7	chr17:4871132	1.66667
SAMD4A	chr14:55034329	1.66667
EP300	chr22:41488613	1.66667
PSMD5	chr9:123605299	1.66667
SNTA1	chr20:32031698	1.66667
DICER1-AS1	chr14:95624024	1.66667
SLC35F5	chr2:114514270	1.66667
PAX6	chr11:31833731	1.66667
BTBD1	chr15:83736106	1.66667
SH3D21	chr1:36771993	1.66667
RHOG	chr11:3862213	1.66667
ELOVL1	chr1:43833409	1.66667
LRG1	chr19:4540036	1.66667
SSH3	chr11:67070918	1.66667
SMARCAD1	chr4:95174444	1.66667
TNPO2	chr19:12833105	1.66667
BMS1P5	chr10:48952629	1.66667
WNT7B	chr22:46373008	1.66667
ERICH1-AS1	chr8:687604	1.66667
PP7080	chr5:473080	1.66667
KLF6	chr10:3827473	1.66667
SRP68	chr17:74068607	1.66667
CENPN	chr16:81040102	1.66667
DFNA5	chr7:24797083	1.66667
CCRL2	chr3:46449048	1.66667
NPY5R	chr4:164265090	1.66667
GUSBP2	chr6:26924333	1.66667
ZNF19	chr16:71523254	1.66667
CTSH	chr15:79237420	1.66667
HIST2H3C	chr1:149824180	1.66667
CBX3P2	chr18:2655394	1.66667
MIR4515	chr15:83736086	1.66667
ZC3H6	chr2:113033177	1.66667
PSMC4	chr19:40476911	1.66667
HMGN2	chr1:26798901	1.66667
APOPT1	chr14:104029293	1.66667
TNFRSF14	chr1:2487803	1.66667
LRRC8B	chr1:89990396	1.66667
RNPS1	chr16:2317887	1.66667
DICER1	chr14:95603147	1.66667
FAM169A	chr5:74162212	1.66667
MIR5088	chr19:50185373	1.66667
PGM5P2	chr9:69147854	1.66667
BTBD19	chr1:45274153	1.66667
BCL3	chr19:45251977	1.66667
STX4	chr16:31044811	1.66667
LDB3	chr10:88428425	1.66667
USP17L15	chr4:9236110	1.66667
FBXO31	chr16:87425713	1.66667
MTX1	chr1:155178489	1.66667
ZNF655	chr7:99156447	1.66667
RGS20	chr8:54793431	1.66667
LOC644656	chr11:9482245	1.66667
SNORD95	chr5:180670376	1.66667
CXCL10	chr4:76944689	1.66667
TM9SF3	chr10:98346809	1.66667
CFAP97	chr4:186125182	1.66667
DHRS4L1	chr14:24476217	1.66667
MAEA	chr4:1283638	1.66667
NPB	chr17:79860071	1.66667
MIR27A	chr19:13947331	1.66667
PPP6R1	chr19:55770038	1.66667
C11ORF31	chr11:57508721	1.66667
INSM2	chr14:36003247	1.66667
AP5B1	chr11:65548062	1.66667
EXD3	chr9:140317714	1.66667
HIF1A	chr14:62162118	1.66667
MLLT10	chr10:21823573	1.66667
HLA-B	chr6:31324989	1.66667
CTSZ	chr20:57582309	1.66667
NFKB2	chr10:104155352	1.66667
ATF1	chr12:51157788	1.66667
MITD1	chr2:99797492	1.66667
GAD2	chr10:26505235	1.66667
CHMP3	chr2:86790620	1.66667
CREM	chr10:35416384	1.66667
NR2F2	chr15:96876568	1.66667
ZNF808	chr19:53030908	1.66667
ADAM17	chr2:9695917	1.66667
PIAS4	chr19:4007595	1.66667
RABL2B	chr22:51222087	1.66667
LINC00612	chr12:9217666	1.66667
BAALC-AS2	chr8:104153570	1.66667
RNF135	chr17:29297955	1.66667
MIR4522	chr17:25621022	1.66667
GUSBP3	chr5:69881629	1.66667
MATN1-AS1	chr1:31191618	1.66667
FAM138D	chr12:67606	1.66667
RBM20	chr10:112404154	1.66667
PNRC1	chr6:89790428	1.66667
EPB41	chr1:29241087	1.66667
SBF2	chr11:10315754	1.66667
SPTLC2	chr14:78083110	1.66667
UBE2E1	chr3:23847383	1.66667
CUL9	chr6:43149921	1.66667
ZNF337	chr20:25677540	1.66667
FAM49B	chr8:130952118	1.66667
ERBB2IP	chr5:65222381	1.5
SCARNA2	chr1:109642814	1.5
LYZL6	chr17:34266560	1.5
TBCCD1	chr3:186288332	1.5
PTPRG	chr3:61547242	1.5
PPP1CB	chr2:28974625	1.5
IER5	chr1:181057637	1.5
DDX21	chr10:70716195	1.5
ADAR	chr1:154580724	1.5
KDM4A-AS1	chr1:44173012	1.5
CDK12	chr17:37617763	1.5
AZIN1-AS1	chr8:103876498	1.5
GAGE12C	chrX:49344551	1.5
PPM1M	chr3:52280185	1.5
ARHGEF35	chr7:143892791	1.5
NPIPB3	chr16:21436658	1.5
ZBTB1	chr14:64971291	1.5
CXCL1	chr4:74735108	1.5
LYL1	chr19:13213974	1.5
SNAI3-AS1	chr16:88729780	1.5
CDC42SE2	chr5:130599701	1.5
TNFSF9	chr19:6531009	1.5
ST7	chr7:116593380	1.5
ERN1	chr17:62207502	1.5
RALGPS1	chr9:129677052	1.5
BLACE	chr7:155160628	1.5
KIAA1841	chr2:61293362	1.5
TTC22	chr1:55266941	1.5
LCP2	chr5:169724822	1.5
LINC01420	chrX:56755717	1.5
LOC101928053	chr11:10830843	1.5
SOX12	chr20:306214	1.5
RHNO1	chr12:2986364	1.5
NR6A1	chr9:127533589	1.5
GAGE12E	chrX:49344551	1.5
TMEM158	chr3:45267814	1.5
MGLL	chr3:127541725	1.5
REEP5	chr5:112258031	1.5
HDAC2	chr6:114291888	1.5
SNRPD3	chr22:24951617	1.5
DDX5	chr17:62502484	1.5
NUTM2B	chr10:81462982	1.5
CCDC66	chr3:56591183	1.5
CORO2A	chr9:100954956	1.5
ZBTB11	chr3:101395988	1.5
MRPS24	chr7:43909145	1.5
LOC220729	chr3:197354752	1.5
SUPT16H	chr14:21852425	1.5
DACT2	chr6:168720434	1.5
RAB6A	chr11:73472201	1.5
DAXX	chr6:33290793	1.5
PTPN6	chr12:7055739	1.5
GRIK3	chr1:37499844	1.5
TP53TG3D	chr16:32264644	1.5
SLC6A18	chr5:1225469	1.5
NAA50	chr3:113465120	1.5
UTP23	chr8:117778741	1.5
SUMO2	chr17:73179098	1.5
SKOR1	chr15:68112041	1.5
CYP27A1	chr2:219646471	1.5
COMMD10	chr5:115420726	1.5
WNK3	chrX:54384438	1.5
JAK1	chr1:65432187	1.5
RAP2C-AS1	chrX:131352534	1.5
LOC100130950	chr17:5095378	1.5
WNT5B	chr12:1726221	1.5
ANLN	chr7:36429411	1.5
MIR769	chr19:46522189	1.5
MCHR2	chr6:100442099	1.5
FFAR2	chr19:35940616	1.5
PARP9	chr3:122283147	1.5
OLIG2	chr21:34398215	1.5
BASP1	chr5:17217669	1.5
ARRDC1-AS1	chr9:140512981	1.5
POM121L1P	chr22:22987012	1.5
C9ORF41	chr9:77643310	1.5
NBPF1	chr1:16940100	1.5
VPS39	chr15:42500524	1.5
NEU3	chr11:74699949	1.5
TBPL1	chr6:134273307	1.5
LOC606724	chr16:30200004	1.5
TMEM254-AS1	chr10:81838949	1.5
PRDM2	chr1:14075875	1.5
LINC01270	chr20:48909256	1.5
IGDCC3	chr15:65670378	1.5
PSMD5-AS1	chr9:123605319	1.5
WDR26	chr1:224622001	1.5
LOC100289361	chr3:142720309	1.5
MAGI1	chr3:66024509	1.5
SLC30A2	chr1:26372629	1.5
CR1	chr1:207669472	1.5
PKD1P1	chr16:16411465	1.5
RFFL	chr17:33416348	1.5
CISD3	chr17:36886509	1.5
FOXD4L3	chr9:70917782	1.5
COL18A1-AS2	chr21:46829980	1.5
SLC25A13	chr7:95951459	1.5
INAFM2	chr15:40616256	1.5
SLC29A2	chr11:66139291	1.5
SNAR-A12	chr19:48448178	1.5
LBX1	chr10:102988717	1.5
DHRS7	chr14:60632211	1.5
MOB4	chr2:198381021	1.5
GAGE12H	chrX:49344551	1.5
RCAN3AS	chr1:24828850	1.5
LINC00441	chr13:48877797	1.5
FLJ37453	chr1:16174642	1.5
SP3	chr2:174830430	1.5
UBTF	chr17:42298250	1.5
LINC01158	chr2:105469641	1.5
ZBTB25	chr14:64970563	1.5
SCARF1	chr17:1549083	1.5
YWHAE	chr17:1303556	1.5
GTF3A	chr13:27998680	1.5
KRAS	chr12:25403865	1.5
SNORA11E	chrX:51806569	1.5
KCTD5	chr16:2732494	1.5
HIST3H2A	chr1:228645560	1.5
SPECC1	chr17:19912648	1.5
ERLEC1	chr2:54014067	1.5
ALDOA	chr16:30075817	1.5
STOML2	chr9:35103192	1.5
LACTB2-AS1	chr8:71520811	1.5
LOC100289333	chr19:12305829	1.5
SLC4A11	chr20:3218835	1.5
IL10RB-AS1	chr21:34638565	1.5
SLC38A7	chr16:58718681	1.5
MIR4466	chr6:157100865	1.5
SHISA5	chr3:48514742	1.5
CMTR2	chr16:71323315	1.5
GFOD2	chr16:67753273	1.5
MED13L	chr12:116714991	1.5
TRAF5	chr1:211500147	1.5
CHST11	chr12:104850691	1.5
ZBTB20	chr3:114866127	1.5
LOC153684	chr5:43042235	1.5
NR1D2	chr3:23986750	1.5
GSK3B	chr3:119813264	1.5
SERPINI1	chr3:167453510	1.5
TBC1D32	chr6:121655646	1.5
SKIL	chr3:170075472	1.5
SNORA11D	chrX:51806569	1.5
HYAL1	chr3:50349812	1.5
PLXNB1	chr3:48471460	1.5
ZBTB16	chr11:113930430	1.5
SNAR-A13	chr19:48448178	1.5
LOC642361	chr10:81585657	1.5
LOC100505938	chr7:8301854	1.5
MIR3621	chr9:140063722	1.5
MATN1	chr1:31196432	1.5
SLC47A2	chr17:19620043	1.5
SOCS2	chr12:93965456	1.5
INSR	chr19:7294011	1.5
ZNF800	chr7:127032778	1.5
NOTCH1	chr9:139440238	1.5
WNK4	chr17:40932648	1.5
PPP1R9B	chr17:48227878	1.5
MX1	chr21:42792484	1.5
MXD1	chr2:70142172	1.5
MRPL30	chr2:99797541	1.5
GCSHP3	chr2:206981296	1.5
C11ORF45	chr11:128775592	1.5
ARF1	chr1:228270850	1.5
PRORSD1P	chr2:55509454	1.5
FAM212B	chr1:112298419	1.5
TBL2	chr7:72993013	1.5
FUT10	chr8:33330664	1.5
LHX6	chr9:124990707	1.5
ZNF569	chr19:37958339	1.5
ITIH1	chr3:52811601	1.5
TRAF3IP2-AS1	chr6:111804674	1.33333
FAT4	chr4:126237566	1.33333
EIF1	chr17:39845126	1.33333
POLG	chr15:89878026	1.33333
NAA38	chr17:7761172	1.33333
CFAP53	chr18:47792865	1.33333
CALCR	chr7:93204042	1.33333
NUDT16L1	chr16:4743693	1.33333
OACYLP	chr18:56702910	1.33333
R3HDM4	chr19:913225	1.33333
MIR3191	chr19:47730276	1.33333
SLC12A5	chr20:44650328	1.33333
WNK1	chr12:862088	1.33333
ULK4P2	chr15:30864757	1.33333
RHOT1	chr17:30469472	1.33333
HLA-DRA	chr6:32407618	1.33333
LOC729737	chr1:140566	1.33333
SPATC1	chr8:145086581	1.33333
ZC3H12C	chr11:109964086	1.33333
NUF2	chr1:163291722	1.33333
AGPAT6	chr8:41435706	1.33333
LINC00657	chr20:34638882	1.33333
INO80	chr15:41408444	1.33333
NME1	chr17:49230919	1.33333
CT45A3	chrX:134883487	1.33333
RGPD6	chr2:111336309	1.33333
ST3GAL1	chr8:134584183	1.33333
PLEKHA1	chr10:124134093	1.33333
PRPF38B	chr1:109234934	1.33333
VPS4A	chr16:69345286	1.33333
EXOC3	chr5:443333	1.33333
C18ORF32	chr18:47013644	1.33333
C22ORF15	chr22:24105207	1.33333
SMIM1	chr1:3689350	1.33333
GPBP1	chr5:56469774	1.33333
ABCD3	chr1:94883932	1.33333
IGHMBP2	chr11:68671318	1.33333
EXD1	chr15:41522955	1.33333
CEP290	chr12:88535993	1.33333
CXCL2	chr4:74964997	1.33333
HERC5	chr4:89378267	1.33333
HS3ST2	chr16:22825859	1.33333
KLHDC9	chr1:161068180	1.33333
KDELR3	chr22:38864066	1.33333
DLL3	chr19:39989556	1.33333
UHRF1BP1	chr6:34759793	1.33333
MIR6747	chr11:62334543	1.33333
CBLN4	chr20:54580528	1.33333
PRELID1	chr5:176730762	1.33333
PIP5KL1	chr9:130693076	1.33333
IZUMO4	chr19:2096867	1.33333
BHMT	chr5:78407603	1.33333
SLC38A10	chr17:79269139	1.33333
SIPA1	chr11:65405577	1.33333
RGPD5	chr2:111336309	1.33333
LOC100129518	chr6:160183364	1.33333
FOXC2	chr16:86600856	1.33333
RGL2	chr6:33267165	1.33333
LOC388692	chr1:149287129	1.33333
CDK11B	chr1:1655859	1.33333
ADAMTSL5	chr19:1513188	1.33333
SNORA57	chr11:62432893	1.33333
SNORD12B	chr20:47896849	1.33333
CTAGE6	chr7:143454843	1.33333
ZNF76	chr6:35227490	1.33333
RNU6-28P	chrX:110664835	1.33333
SLC35E2B	chr1:1624243	1.33333
UQCC2	chr6:33679528	1.33333
MRGPRX3	chr11:18142501	1.33333
KLF10	chr8:103666192	1.33333
SRF	chr6:43139032	1.33333
EVX2	chr2:176948690	1.33333
TMEM42	chr3:44903400	1.33333
DHRS11	chr17:34948225	1.33333
NME1-NME2	chr17:49230896	1.33333
MIR588	chr6:126805776	1.33333
APOA2	chr1:161193418	1.33333
HNRNPK	chr9:86595184	1.33333
KRT9	chr17:39728310	1.33333
MIR6813	chr20:62708363	1.33333
BARHL1	chr9:135457992	1.33333
ADCY4	chr14:24804277	1.33333
MIR5708	chr8:81153623	1.33333
DCUN1D3	chr16:20911561	1.33333
SKOR2	chr18:44775554	1.33333
U2AF1	chr21:44527688	1.33333
SIGIRR	chr11:417397	1.33333
MIR9500	chr2:219687812	1.33333
LOC100507053	chr4:100010007	1.33333
PRDX2	chr19:12912724	1.33333
PRSS16	chr6:27215501	1.33333
CANX	chr5:179125929	1.33333
TRPS1	chr8:116680239	1.33333
DDX11L16	chrY:59360854	1.33333
RPL10	chrX:153626837	1.33333
PAPD4	chr5:78908242	1.33333
HAS3	chr16:69139466	1.33333
USP17L11	chr4:9250355	1.33333
PDXDC1	chr16:15068819	1.33333
LTK	chr15:41806085	1.33333
MIR519E	chr19:54183193	1.33333
RNVU1-20	chr1:149605916	1.33333
FGF11	chr17:7344060	1.33333
FNIP1	chr5:131132756	1.33333
STX11	chr6:144471653	1.33333
BCOR	chrX:39956719	1.33333
ARPC2	chr2:219082119	1.33333
UGDH	chr4:39529218	1.33333
TRAF1	chr9:123691451	1.33333
USP17L17	chr4:9245604	1.33333
RNF13	chr3:149530474	1.33333
NT5C1A	chr1:40137710	1.33333
SLC16A5	chr17:73084035	1.33333
GMFB	chr14:54955744	1.33333
MIR6745	chr11:47201288	1.33333
NAGLU	chr17:40687950	1.33333
POLR2A	chr17:7387697	1.33333
SNHG6	chr8:67837777	1.33333
KLHL5	chr4:39046450	1.33333
GAGE6	chrX:49325479	1.33333
ANKRD35	chr1:145549208	1.33333
BAG1	chr9:33264759	1.33333
CT45A6	chrX:134883487	1.33333
OSGIN2	chr8:90914761	1.33333
ULK4P1	chr15:30864757	1.33333
CHTF8	chr16:69166071	1.33333
FLJ10038	chr15:50647076	1.33333
NEUROG1	chr5:134871639	1.33333
MRPL21	chr11:68671303	1.33333
NAGK	chr2:71295407	1.33333
METTL12	chr11:62432778	1.33333
SLC35E2	chr1:1677438	1.33333
USP17L18	chr4:9250355	1.33333
PLEKHO2	chr15:65134081	1.33333
CSAG1	chrX:151903226	1.33333
DUSP23	chr1:159750758	1.33333
MAML1	chr5:179159850	1.33333
SMAD1	chr4:146402950	1.33333
SGMS1-AS1	chr10:52384710	1.33333
LOC100131303	chr16:68049814	1.33333
CALM1	chr14:90863326	1.33333
KMT2E	chr7:104654636	1.33333
TAF7	chr5:140700351	1.33333
SLC25A32	chr8:104427563	1.33333
SYT15	chr10:46970601	1.33333
SUGT1	chr13:53226830	1.33333
LINGO1	chr15:77924869	1.33333
DHTKD1	chr10:12110915	1.33333
SPDYE6	chr7:101996889	1.33333
MTPAP	chr10:30638267	1.33333
MED4	chr13:48669277	1.33333
PPP4R1L	chr20:56884495	1.33333
MIR3180-2	chr16:18496124	1.33333
MIR4449	chr4:53578848	1.33333
HOXD9	chr2:176987412	1.33333
APBB1IP	chr10:26727265	1.33333
APBB2	chr4:40859172	1
PDCL3	chr2:101179417	1
BOLA3-AS1	chr2:74375107	1
NIFK-AS1	chr2:122407564	1
MIR515-2	chr19:54188262	1
WDR34	chr9:131419129	1
C14ORF80	chr14:105956519	1
STK25	chr2:242447775	1
LOC102546298	chr5:149865555	1
LARP7	chr4:113558611	1
GLUD1P7	chr10:48952591	1
LOC401357	chr7:56880429	1
RNF223	chr1:1009687	1
LOC101060019	chr2:67131567	1
ABR	chr17:1012340	1
FOXE1	chr9:100615536	1
RIMBP3B	chr22:21738039	1
PLEKHG4	chr16:67312059	1
TRAPPC9	chr8:141467861	1
FNDC1	chr6:159590428	1
OGFR-AS1	chr20:61436939	1
EMILIN1	chr2:27301434	1
TP53TG3C	chr16:32687448	1
FUS	chr16:31191430	1
POLR2J	chr7:102119381	1
ADAM23	chr2:207308367	1
TFR2	chr7:100239173	1
IDO2	chr8:39792473	1
LAGE3	chrX:153707596	1
LOC101929464	chr1:33815952	1
ZNF687	chr1:151254030	1
METTL21A	chr2:208489696	1
FUT4	chr11:94277016	1
AGPS	chr2:178257470	1
MIR637	chr19:3961510	1
FKBP4	chr12:2904107	1
CYSTM1	chr5:139554652	1
TTC41P	chr12:104323989	1
KLF4	chr9:110252047	1
FXYD2	chr11:117698807	1
MIR3180-3	chr16:16403731	1
CADPS2	chr7:122526813	1
TAB2	chr6:149639435	1
FAM161A	chr2:62081278	1
PGM1	chr1:64059479	1
PIGG	chr4:492988	1
RNU6-2	chr19:1021520	1
SUSD6	chr14:70078309	1
MIR4444-1	chr2:178077453	1
THOC7	chr3:63849462	1
GGTLC2	chr22:22987090	1
PPID	chr4:159644552	1
LINC01185	chr2:61108449	1
MIR4726	chr17:36875943	1
LOC284412	chr19:37759912	1
GPR157	chr1:9189229	1
OR52A1	chr11:5173599	1
CTAGE4	chr7:143880547	1
SGSM3	chr22:40766565	1
RPL27	chr17:41150445	1
SLC35A1	chr6:88182642	1
CRLF3	chr17:29151778	1
CATSPER2P1	chr15:44038496	1
HMBS	chr11:118955586	1
RFK	chr9:79009444	1
FMNL1	chr17:43299291	1
2007-09-01	chr7:35840595	1
HIST1H4B	chr6:26027480	1
PPP1R15A	chr19:49375648	1
BMF	chr15:40398287	1
LPAR3	chr1:85358896	1
LMNB1	chr5:126112314	1
LOC101927410	chr18:10661929	1
GFOD1	chr6:13408369	1
LOC100996349	chr19:22790817	1
PFKFB2	chr1:207226619	1
LCLAT1	chr2:30670091	1
MDM2	chr12:69201951	1
IPPK	chr9:95432547	1
ANKRD30BP2	chr21:14410486	1
PRKD2	chr19:47220384	1
KCNA3	chr1:111217655	1
KCNG3	chr2:42721237	1
F10	chr13:113777112	1
ACSL1	chr4:185726942	1
FAM110D	chr1:26485510	1
MOBP	chr3:39543556	1
HCG18	chr6:30294933	1
TRIM52-AS1	chr5:180688212	1
KIAA0895	chr7:36406782	1
HBM	chr16:215972	1
EN2	chr7:155250823	1
MIR6846	chr8:145112283	1
IRF2	chr4:185395726	1
TMEM218	chr11:124981604	1
NAB1	chr2:191513847	1
ASIC4	chr2:220378891	1
POLR2J3	chr7:102213068	1
PANK2	chr20:3870462	1
MPHOSPH9	chr12:123717785	1
ADRB3	chr8:37824184	1
NDUFA12	chr12:95397489	1
MIR4793	chr3:48681713	1
STAMBPL1	chr10:90639943	1
SNX8	chr7:2354110	1
FNDC3B	chr3:171758343	1
KDM2B	chr12:122018364	1
CHRM3	chr1:239792372	1
ASF1A	chr6:119215240	1
TOMM40	chr19:45394476	1
IGSF6	chr16:21663987	1
SFMBT1	chr3:53080089	1
MIR5091	chr4:13629488	1
GOLGA8R	chr15:30706463	1
LOC283922	chr16:74402153	1
N4BP2L1	chr13:33002315	1
CT47A1	chrX:120114778	1
ZSCAN20	chr1:33938231	1
FAM3D	chr3:58652561	1
AP2A2	chr11:925808	1
CYR61	chr1:86046443	1
JRKL	chr11:96123157	1
RNASE4	chr14:21152371	1
HIST2H2BE	chr1:149858232	1
NCLN	chr19:3185874	1
MAPK8IP1	chr11:45907046	1
NUDT4P1	chr12:93771745	1
FAM20A	chr17:66597095	1
SLC9A5	chr16:67282854	1
SFPQ	chr1:35658743	1
TIGD6	chr5:149380730	1
ZNF581	chr19:56154985	1
CACNB3	chr12:49208214	1
SKP1	chr5:133512724	1
RNASEK	chr17:6915735	1
SPRN	chr10:135238121	1
MRPL12	chr17:79670399	1
DDAH1	chr1:85930889	1
C12ORF56	chr12:64784345	1
DUSP2	chr2:96811179	1
STMN3	chr20:62284963	1
RIPPLY3	chr21:38378862	1
EFCAB7	chr1:63988971	1
MAL	chr2:95691399	1
C19ORF66	chr19:10196805	1
GAGE12J	chrX:49178508	1
EGR1	chr5:137801180	1
CD58	chr1:117113715	1
ZIC4	chr3:147123307	1
ZSCAN10	chr16:3149318	1
HDGFRP3	chr15:83876770	1
RRAS2	chr11:14380730	1
LEF1	chr4:109087953	1
MYH3	chr17:10560626	1
SULT1A1	chr16:28634907	1
RAB23	chr6:57086259	1
LOC338963	chr15:83382745	1
RBM14-RBM4	chr11:66384052	1
VPS9D1	chr16:89787394	1
CPM	chr12:69326979	1
LAMTOR5-AS1	chr1:110950430	1
ZNF497	chr19:58874214	1
LINC00473	chr6:166401527	1
UGT1A4	chr2:234627437	1
LOC101928495	chrX:125243744	1
RCAN3	chr1:24828840	1
USP17L22	chr4:9259849	1
GPAT2	chr2:96700727	1
NUP50	chr22:45559725	1
ARRDC4	chr15:98503932	1
GLYCTK	chr3:52321835	1
HOXA7	chr7:27196296	1
DIMT1	chr5:61699728	1
ZNF267	chr16:31885078	1
TXNIP	chr1:145438437	1
RAB4B-EGLN2	chr19:41284123	1
IL27	chr16:28518155	1
HMGB2	chr4:174255509	1
FAM200B	chr4:15683351	1
P3H4	chr17:39968451	1
PRDM11	chr11:45115563	1
ASGR2	chr17:7017629	1
BTBD3	chr20:11871370	1
MAPT-IT1	chr17:43973148	1
PTPN1	chr20:49126857	1
CT47A12	chrX:120114778	1
PAPD5	chr16:50186828	1
UBE2S	chr19:55919325	1
ATP6V1B2	chr8:20054703	1
NUS1	chr6:117996616	1
KRBOX1-AS1	chr3:42978277	1
SP1	chr12:53774427	1
TOX4	chr14:21945334	1
LSM5	chr7:32534870	1
UTP3	chr4:71554195	1
MIR135B	chr1:205417526	1
SECISBP2L	chr15:49338760	1
CT45A5	chrX:134866213	1
RBM11	chr21:15588465	1
FCGR2C	chr1:161551128	1
GPSM3	chr6:32163300	1
A1BG	chr19:58864865	1
TNFRSF1B	chr1:12227059	1
WNT2B	chr1:113051369	1
MRPL49	chr11:64889715	1
C7ORF26	chr7:6629651	1
MRPL40	chr22:19420035	1
FEZF2	chr3:62359190	1
MIR6720	chr6:1390646	1
ADAMTS13	chr9:136279458	1
ZMYND12	chr1:42921938	1
SLC41A3	chr3:125803134	1
TSPAN6	chrX:99891729	1
CIB1	chr15:90808991	1
CTNNAL1	chr9:111775874	1
SNORD10	chr17:7480128	1
MYO1F	chr19:8642331	1
HOXB9	chr17:46703835	1
UGP2	chr2:64068097	1
MIRLET7A3	chr22:46508628	1
RSRC2	chr12:123011560	1
ORM2	chr9:117092068	1
RNF130	chr5:179499118	1
MIR6511B2	chr16:2156749	1
LOC100130093	chr1:227916239	1
SETX	chr9:135230372	1
GSDMD	chr8:144635556	1
KRBOX4	chrX:46306623	1
ATP1B3	chr3:141595469	1
TRIM25	chr17:54991409	1
CRKL	chr22:21271713	1
PGD	chr1:10459174	1
TOB2P1	chr6:28186707	1
WAC	chr10:28821516	1
CELF4	chr18:35146000	1
EIF3G	chr19:10230599	1
ARHGAP22	chr10:49701692	1
RASSF1	chr3:50375664	1
HCAR1	chr12:123215129	1
ATF7IP2	chr16:10479911	1
UBE2J2	chr1:1209234	1
TCP10L2	chr6:167584080	1
GNL2	chr1:38061586	1
LOC102724058	chr2:166813927	1
HSPB1	chr7:75931874	1
AMZ2	chr17:66244144	1
RPPH1	chr14:20811570	1
TOP3A	chr17:18218321	1
ARL4A	chr7:12726910	1
RWDD2A	chr6:83903031	1
TMCO3	chr13:114145307	1
DSCC1	chr8:120868170	1
GOLGA3	chr12:133405288	1
GTF2H2	chr5:70363497	1
TRIM41	chr5:180650262	1
CT47A11	chrX:120114778	1
TMEM200A	chr6:130687425	1
ZNF331	chr19:54041539	1
ESRRA	chr11:64073698	1
LINC00330	chr13:45383766	1
KRT37	chr17:39580822	1
SLC35A5	chr3:112280856	1
SLC22A16	chr6:110797844	1
ARL2BP	chr16:57279037	1
PHF1	chr6:33378772	1
OPA1	chr3:193310932	1
TMEM140	chr7:134832765	1
USP4	chr3:49377536	1
S100A3	chr1:153521734	1
PHYKPL	chr5:177659823	1
MEMO1	chr2:32235733	1
ZNF439	chr19:11976843	1
MIR4292	chr9:139725408	1
IGFLR1	chr19:36233351	1
ASPSCR1	chr17:79935425	1
PTGS2	chr1:186649559	1
POP7	chr7:100303675	1
UBE2Q2	chr15:76135626	1
CCNDBP1	chr15:43477465	1
TEX10	chr9:103114853	1
KCNAB1	chr3:155838336	1
P3H2-AS1	chr3:189838752	1
TBC1D3L	chr17:36348623	1
BLOC1S5	chr6:8064647	1
MIR3670-3	chr16:18499619	1
GYG2	chrX:2746862	1
BROX	chr1:222886662	1
MIR662	chr16:820182	1
SSBP2	chr5:81047072	1
NME4	chr16:447741	1
IRF2BPL	chr14:77495042	1
BNC1	chr15:83952209	1
CYTH4	chr22:37678494	1
RPS15AP10	chr1:46112357	1
MIR6791	chr19:6736789	1
MIR134	chr14:101521023	1
GGT1	chr22:24999123	1
RPLP0	chr12:120639014	1
YWHAG	chr7:75988342	1
ALG10B	chr12:38710556	1
SYNE3	chr14:95942173	1
ARX	chrX:25034065	1
EMC2	chr8:109455852	1
LSM14B	chr20:60697516	1
SPPL2A	chr15:51057910	1
HOXD12	chr2:176964529	1
DNM3OS	chr1:172113975	1
LOC101927027	chr2:179278385	1
ARHGEF15	chr17:8214139	1
SRD5A1	chr5:6633499	1
TCEB1	chr8:74884143	1
WDR77	chr1:111991830	1
SLC39A13	chr11:47430045	1
CCNT1	chr12:49110781	1
KCNJ12	chr17:21279698	1
CT47A5	chrX:120114778	1
SUZ12	chr17:30264043	1
MRPS16	chr10:75012451	1
ARPC4	chr3:9834231	1
MZF1	chr19:59084942	1
MAPRE2	chr18:32621613	1
ADIPOR1	chr1:202927700	1
WAC-AS1	chr10:28821283	1
CYB5R2	chr11:7694829	1
GABRB3	chr15:26874325	1
TAF3	chr10:7860466	1
IL4R	chr16:27325229	1
SLC25A30-AS1	chr13:45992296	1
EMILIN2	chr18:2847027	1
VASP	chr19:46010687	1
ERVMER34-1	chr4:53617807	1
TMEM229B	chr14:67982021	1
GUK1	chr1:228327928	1
ADM	chr11:10326526	1
CD47	chr3:107809935	1
IMPDH1	chr7:128050036	1
C1ORF131	chr1:231376933	1
NUDT4	chr12:93771698	1
TSGA13	chr7:130371406	1
SCNN1G	chr16:23194039	1
LINC01135	chr1:59250822	1
SEC24A	chr5:133984474	1
CXORF56	chrX:118699372	1
BHLHE41	chr12:26278003	1
C17ORF70	chr17:79519429	1
FAM212A	chr3:49840686	1
MCTP1	chr5:94620279	1
TRIM68	chr11:4629489	1
AGFG1	chr2:228336887	1
TC2N	chr14:92302870	1
KRT82	chr12:52800176	1
GK	chrX:30671475	1
FGFBP3	chr10:93669258	1
MIR6830	chr5:131553611	1
TMEM86A	chr11:18720281	1
KRTAP4-3	chr17:39324424	1
MIR1263	chr3:163889344	1
LOC101928069	chr11:66247720	1
LOC101926943	chr7:74143256	1
MIR8072	chr12:123849390	1
HIST2H4A	chr1:149804220	1
LOC91450	chr15:78286567	1
LDLRAD4	chr18:13641756	1
TAS1R3	chr1:1266725	1
ARID3A	chr19:926036	1
SPTAN1	chr9:131314836	1
PSMG2	chr18:12702986	1
MYBL2	chr20:42295658	1
RPS8	chr1:45241245	1
AGO4	chr1:36273827	1
THTPA	chr14:24025190	1
CDK6	chr7:92463231	1
SNAP25	chr20:10199476	1
NUDT4P2	chr12:93771701	1
PDE8A	chr15:85523743	1
FN3KRP	chr17:80674581	1
C16ORF13	chr16:686366	1
LOC102724096	chr6:4190263	1
IQCH-AS1	chr15:67814182	1
ACRBP	chr12:6756580	1
SPATA22	chr17:3375041	1
ZNF234	chr19:44645709	1
MIR506	chrX:146312361	1
SLC44A1	chr9:108006893	1
TBC1D3C	chr17:36348649	1
DEFB104B	chr8:7332604	1
ACO1	chr9:32384600	1
OSTM1	chr6:108395941	1
NAPEPLD	chr7:102789569	1
RNU6-57P	chr7:143906966	1
PRMT6	chr1:107599266	1
RNU4ATAC	chr2:122288455	1
NDUFB6	chr9:32573182	1
ERI2	chr16:20817795	1
PTCH1	chr9:98279247	1
FOXD2-AS1	chr1:47900313	1
LONP2	chr16:48278077	1
CHKA	chr11:67888858	1
CCDC151	chr19:11545980	1
PRB3	chr12:11422641	1
PSME4	chr2:54197977	1
ANXA5	chr4:122618147	1
LOC101929181	chr1:11669587	1
DUOX1	chr15:45422191	1
SAP30L-AS1	chr5:153825382	1
C2CD5	chr12:22697480	1
CPA6	chr8:68658620	1
LOC100132352	chr9:68726540	1
PHIP	chr6:79788011	1
DARS-AS1	chr2:136742745	1
LINC00200	chr10:1205707	1
TMEM56-RWDD3	chr1:95583478	1
RAP1B	chr12:69004618	1
P2RY6	chr11:72983186	1
GLTSCR1	chr19:48111452	1
AK4	chr1:65613849	1
CBL	chr11:119076985	1
PPAPDC1A	chr10:122216465	1
WDR25	chr14:100842832	1
PGA3	chr11:60970966	1
MYO19	chr17:34891305	1
SNORD116-20	chr15:25332807	1
PLD4	chr14:105391186	1
ENY2	chr8:110346551	1
DENND3	chr8:142138719	1
GNAQ	chr9:80646365	1
ELOVL6	chr4:111119771	1
ZNF561-AS1	chr19:9732157	1
USP34	chr2:61697849	1
SNORD80	chr1:173834041	1
SPC25	chr2:169746944	1
EIF3C	chr16:28415209	1
TRIM39	chr6:30295007	1
CYP51A1	chr7:91763840	1
SKIDA1	chr10:21814611	1
GNB5	chr15:52472162	1
PGAM4	chrX:77225135	1
COX11	chr17:53046064	1
C10ORF2	chr10:102747292	1
VWA5B2	chr3:183948316	1
UPP1	chr7:48128850	1
LOC101928438	chr9:102582171	1
PRKAB1	chr12:120105760	1
UBP1	chr3:33481870	1
RBM27	chr5:145583162	1
PRDM15	chr21:43283411	1
ADPRHL2	chr1:36554452	1
MIR4285	chr7:101936368	1
MIR3184	chr17:28444178	1
MIR499A	chr20:33578178	1
BCAT1	chr12:25056009	1
ZNF398	chr7:148844559	1
CAPN7	chr3:15247732	1
LOC101928738	chr17:77893155	1
CT45A9	chrX:134866213	1
EXOC3-AS1	chr5:443275	1
GIT2	chr12:110434194	1
CASK	chrX:41782287	1
TIFA	chr4:113207059	1
NANS	chr9:100818958	1
ANO6	chr12:45686465	1
HIPK1	chr1:114471995	1
USP17L21	chr4:9264597	1
BOLA2B	chr16:29466285	1
SMCR8	chr17:18218593	1
DNAJC19	chr3:180707306	1
RNF169	chr11:74459912	1
CT47A9	chrX:120114778	1
MSL1	chr17:38278789	1
HS3ST3A1	chr17:13505259	1
TBC1D3H	chr17:34591996	1
CT45A8	chrX:134866213	1
TP53AIP1	chr11:128813294	1
CAPN10-AS1	chr2:241525733	1
EED	chr11:85955805	1
ALX1	chr12:85674035	1
EDRF1-AS1	chr10:127440629	1
FAM19A4	chr3:68981761	1
MIR200C	chr12:7072861	1
MIR2053	chr8:113655721	1
C21ORF58	chr21:47738134	1
NFIL3	chr9:94186908	1
TM6SF1	chr15:83776323	1
CIITA	chr16:10971054	1
C1ORF94	chr1:34642552	1
ATP6V1C1	chr8:104033247	1
CHEK2P2	chr15:20487996	1
ZMIZ1-AS1	chr10:80827205	1
ZNF709	chr19:12595632	1
BLOC1S5-TXNDC5	chr6:8064647	1
TNRC18	chr7:5463177	1
ERMAP	chr1:43282775	1
MYCBPAP	chr17:48585744	1
LOC101929154	chr5:77254070	1
RPN1	chr3:128369719	1
LOC101927588	chr8:125259639	1
CLPS	chr6:35765121	1
VPS16	chr20:2821342	1
SIGLEC1	chr20:3687775	1
NUB1	chr7:151038846	1
GPRIN2	chr10:46993545	1
TMEM263	chr12:107349543	1
LIPT1	chr2:99771536	1
GRIN2A	chr16:10276611	1
MAN2C1	chr15:75660968	1
MIR7973-2	chr15:51606304	1
CEMP1	chr16:2581409	1
LAMA3	chr18:21269406	1
APOBEC3F	chr22:39436672	1
TBC1D3	chr17:36348621	1
TRIM47	chr17:73874656	1
CC2D1B	chr1:52831877	1
QSOX2	chr9:139137687	1
CITED2	chr6:139695350	1
SLC39A4	chr8:145641917	1
GDPD4	chr11:76998463	1
FAHD2B	chr2:97760582	1
MIR34A	chr1:9211836	1
RXFP4	chr1:155911479	1
API5	chr11:43333504	1
ENPP7P13	chr16:33571843	1
NELFA	chr4:2010962	1
DYNC1LI1	chr3:32612366	1
LHX4	chr1:180199432	1
RAB2B	chr14:21944832	1
LINC00959	chr10:131909081	1
NUDT8	chr11:67397408	1
ZSCAN21	chr7:99647416	1
ABCB9	chr12:123451056	1
LINC00273	chr16:33962503	1
SNORD83B	chr22:39709916	1
HOXC10	chr12:54378945	1
TMC5	chr16:19422056	1
LINC01526	chr6:82523909	1
RPL18A	chr19:17970686	1
APOO	chrX:23926057	1
SNAPC5	chr15:66790146	1
WASH2P	chr2:114341229	1
GPER1	chr7:1126442	1
MYDGF	chr19:4670415	1
TAF11	chr6:34855848	1
LOC100506082	chr11:4208381	1
IFT88	chr13:21141207	1
ZNRD1-AS1	chr6:30028961	1
ZNF263	chr16:3333486	1
TPT1-AS1	chr13:45915479	1
SHPK	chr17:3539616	1
RNH1	chr11:507283	1
MIS12	chr17:5389693	1
SNHG12	chr1:28908366	1
RNMT	chr18:13726703	1
VWA9	chr15:65903486	1
PIGU	chr20:33265089	1
WRNIP1	chr6:2765665	1
SUCLG2	chr3:67705038	1
IFNAR2	chr21:34602199	1
IFRD2	chr3:50330026	1
TSFM	chr12:58176527	1
RMND1	chr6:151773316	1
LOC81691	chr16:20817766	1
COL12A1	chr6:75915623	1
GNB3	chr12:6950017	1
OR10AD1	chr12:48597075	1
ZNF416	chr19:58090243	1
ZDHHC2	chr8:17013835	1
MAATS1	chr3:119421868	1
PTPRE	chr10:129845812	1
PTK2B	chr8:27168998	1
DUSP22	chr6:292056	1
MCRS1	chr12:49960222	1
PKD1	chr16:2185899	1
DIRC2	chr3:122513900	1
PSG8	chr19:43269831	1
CRY2	chr11:45868956	1
PNPLA4	chrX:7895475	1
RFWD2	chr1:176176380	1
MAML2	chr11:96076344	1
B3GNT9	chr16:67184902	1
C20ORF173	chr20:34117481	1
ANKRD10	chr13:111567454	1
TAGLN2	chr1:159893507	1
RBM33	chr7:155437202	1
SYT10	chr12:33592754	1
THYN1	chr11:134123260	1
SOCS2-AS1	chr12:93965174	1
MIR4444-2	chr2:178077453	1
RPL12	chr9:130213711	1
WIZ	chr19:15560762	1
PCP4L1	chr1:161228516	1
TEX261	chr2:71222001	1
PRDX1	chr1:45987610	1
ZNF721	chr4:492960	1
AEBP2	chr12:19593514	1
DCLRE1B	chr1:114447914	1
TP73	chr1:3607235	1
RUNX1	chr21:36260987	1
DYRK2	chr12:68042511	1
PCLO	chr7:82792197	1
LOC102723859	chr17:36348607	1
SLC22A1	chr6:160542862	1
MYBPC3	chr11:47374253	1
MYPN	chr10:69869189	1
EIF2S3	chrX:24073064	1
DGKZ	chr11:46366816	1
SRBD1	chr2:45838433	1
INVS	chr9:102861501	1
RHEBL1	chr12:49463808	1
NPM2	chr8:21881620	1
LOC148413	chr1:1334909	1
HELZ2	chr20:62199107	1
SPHK1	chr17:74380689	1
IFNGR2	chr21:34775201	1
ITPR1	chr3:4535031	1
TBC1D20	chr20:443197	1
RPL19P12	chr7:102782850	1
RBX1	chr22:41347350	1
TSNAX	chr1:231664398	1
LINC01191	chr2:114737145	1
LYPLA2	chr1:24117645	1
GREM1	chr15:33010204	1
SUN2	chr22:39151467	1
DYNLRB1	chr20:33104188	1
HCN3	chr1:155247217	1
FOXD4L4	chr9:70428899	1
MCL1	chr1:150552214	1
PRNP	chr20:4667156	1
FOXA3	chr19:46367517	1
CTGF	chr6:132272518	1
LOC613038	chr16:30218248	1
PTPN7	chr1:202129119	1
LPAR2	chr19:19739039	1
PSME1	chr14:24605366	1
ITGB3BP	chr1:63988944	1
CNEP1R1	chr16:50059116	1
ZNF213	chr16:3185133	1
MIR6888	chr2:160043345	1
TIGD7	chr16:3355439	1
RTN4	chr2:55276326	1
GOLGA8M	chr15:28957567	1
RGS5	chr1:163291581	1
INPP4B	chr4:143767604	1
GMPPB	chr3:49761407	1
GAGE12B	chrX:49306370	1
HIST1H2BG	chr6:26216872	1
AIFM2	chr10:71892690	1
LOC100130691	chr2:178257419	1
BRAT1	chr7:2595392	1
CIC	chr19:42788816	1
LINC00582	chr1:231747836	1
HNRNPDL	chr4:83351378	1
CXCL12	chr10:44880545	1
TFAP2C	chr20:55204357	1
IDI1	chr10:1095061	1
FAR1	chr11:13690205	1
MIR191	chr3:49058142	1
OR11H1	chr22:16449804	1
TUBG1	chr17:40761357	1
DSCAS	chr18:28681550	1
SETDB2	chr13:50018428	1
OPN1LW	chrX:153409697	1
SMIM14	chr4:39640481	1
AKR7A2P1	chr1:113465971	1
MLF2	chr12:6862636	1
ACSF3	chr16:89160216	1
ZFP64	chr20:50808524	1
DDX11L5	chr9:11986	1
ABCA9-AS1	chr17:67000854	1
ITGA11	chr15:68724492	1
MIR409	chr14:101531636	1
LOC100505549	chr18:55297533	1
TCTN2	chr12:124155659	1
ZMIZ1	chr10:80828791	1
MALAT1	chr11:65265232	1
CPSF4	chr7:99036562	1
SNORA59B	chr1:12567299	1
PPIE	chr1:40204516	1
RABL2A	chr2:114384816	1
PLEKHM2	chr1:16010826	1
PPP1R18	chr6:30655093	1
DNAJC24	chr11:31391376	1
JUN	chr1:59249785	1
RBP1	chr3:139258671	1
LOC102723701	chr8:37594944	1
CSAG3	chrX:151883038	1
ARHGEF10	chr8:1772148	1
SCG5	chr15:32933869	1
SMARCE1	chr17:38804103	1
ARHGAP27	chr17:43510282	1
DPYSL3	chr5:146889619	1
MNX1	chr7:156803347	1
KBTBD7	chr13:41768702	1
PTGIS	chr20:48184707	1
PNKD	chr2:219135114	1
DPCD	chr10:103348088	1
NCF1C	chr7:74587802	1
SSC4D	chr7:76039012	1
NSMCE4A	chr10:123734743	1
MIR7110	chr3:122880640	1
TMCC3	chr12:95044338	1
RAB3IP	chr12:70172731	1
TANGO2	chr22:20008591	1
S1PR2	chr19:10341948	1
SSTR2	chr17:71161159	1
DLX2	chr2:172967478	1
ZNF598	chr16:2059822	1
ENOSF1	chr18:712517	1
MIR4647	chr6:44222022	1
ADAM19	chr5:157002831	1
C9ORF41-AS1	chr9:77567880	1
TRIP12	chr2:230786725	1
TP73-AS1	chr1:3663335	1
MIR147B	chr15:45725247	1
POM121L10P	chr22:25055114	1
PAEP	chr9:138453603	1
C17ORF59	chr17:8093564	1
CT47A4	chrX:120114778	1
CT45A2	chrX:134866213	1
MIR29B1	chr7:130562298	1
CFAP58	chr10:106113521	1
NTM	chr11:131780711	1
ASAP1	chr8:131455906	1
TTC30B	chr2:178417524	1
HIATL2	chr9:99775862	1
SLC50A1	chr1:155108287	1
C16ORF62	chr16:19566736	1
RANBP1	chr22:20103460	1
GALNT2	chr1:230202941	1
C1GALT1	chr7:7222245	1
IMPA2	chr18:11981426	1
ATXN2	chr12:112037480	1
CHDH	chr3:53880420	1
MIR6849	chr8:145625739	1
MIR4469	chr8:42751418	1
FLYWCH2	chr16:2933195	1
BCL6	chr3:187463513	1
ARRDC3-AS1	chr5:90676163	1
UBE2L3	chr22:21922018	1
FZD10	chr12:130647003	1
ATP6V1E1	chr22:18111588	1
C1ORF86	chr1:2126214	1
MCTP2	chr15:94841429	1
LMX1A	chr1:165325952	1
TIMP1	chrX:47441689	1
[truncated: 24,284 more rows]
