# Supplementary material for: Modulation of macrophage inflammatory function through selective inhibition of the epigenetic reader protein SP140
Source: BMC Biol. 2022 Aug 19;20:182. doi: 10.1186/s12915-022-01380-6 (PMC9392322; doi:10.1186/s12915-022-01380-6)
Supplement: Supplementary file 14 — Additional file 14: Table S14. Characteristics Table of anti-TNF refractory CD patients. [file 12915_2022_1380_MOESM14_ESM.xlsx]

## Sheet: Supplemental table 14
				Characteristics Table of anti-TNF refractory CD patients (No reponder to anti-TNF)
				Medication: Anti-TNF
				Surgery_Type	Indication	Birth date	Gender	Smoking	Montreal_L	Montreal_B	Montreal_p
			Patient 1	Colectomy	Active disease	1984	Female	yes	3		1
			Patient 2	Colectomy	Active disease	1990	Female	no	3	3	1
			Patient 3	Colectomy	Active disease	1970	Male	no	3	3	1
			Patient 4	Subtotal colectomy	Active disease	1994	Male	no	3	3	1
